# Supplementary material for: nBuLi-promoted anti-Markovnikov selective hydroboration of unactivated alkenes and internal alkynes
Source: Royal Society of Chemistry journal article supplement (doi:10.1039/c9qo00750d), 2019-01-01

# Supporting Information

## **<sup>18</sup>BuLi-Promoted *anti*-Markovnikov Selective Hydroboration of Unactivated Alkenes and Internal Alkynes**

Zi-Chao Wang,<sup>a,b</sup> Min Wang,<sup>b</sup> Jian Gao,<sup>a,b</sup> Shi-Liang Shi,<sup>\*,b</sup> and Youjun Xu<sup>\*,a</sup>

- a. School of Pharmaceutical Engineering, and Key Laboratory of Structure-Based Drug Design & Discovery (Ministry of Education), Shenyang Pharmaceutical University, Shenyang 110016, China.  
E-mail: xuyoujun@syphu.edu.cn
- b. State Key Laboratory of Organometallic Chemistry, Center for Excellence in Molecular Synthesis, Shanghai Institute of Organic Chemistry, Chinese Academy of Sciences, 345 Lingling Road, Shanghai 200032, China.  
E-mail: [shiliangshi@sioc.ac.cn](mailto:shiliangshi@sioc.ac.cn)

### Table of Contents

|                                                                                         |    |
|-----------------------------------------------------------------------------------------|----|
| <b>General Information</b> .....                                                        | 2  |
| <b><sup>18</sup>BuLi-Promoted <i>anti</i>-Markovnikov Selective Hydroboration</b> ..... | 3  |
| <b>Substrate Synthesis</b> .....                                                        | 21 |
| <b>Gram-Scale Reaction and Transformation of Product</b> .....                          | 25 |
| <b>Mechanistic Studies</b> .....                                                        | 27 |
| <b>References</b> .....                                                                 | 29 |
| <b>NMR Spectra</b> .....                                                                | 30 |

## General Information

All the reactions were conducted under an N<sub>2</sub> atmosphere with standard vacuum-line techniques, and the glassware was dried in an oven (140 °C). Pinacolborane (HBpin) was purchased from Energy Chemical Co. Ltd and was stored in the refrigerator, n-Butyllithium (<sup>n</sup>BuLi, 2.5 M in hexane) was purchased from Energy Chemical Co. Ltd and was stored in the refrigerator. All new compounds were characterized by NMR spectroscopy, IR spectroscopy, high-resolution mass spectroscopy. NMR spectra were recorded on an Agilent 400 MHz or 600MHz, Varian 400 MHz or Bruker 400 MHz spectrometers and were calibrated using residual solvent as an internal reference (CDCl<sub>3</sub>: 7.26 ppm for <sup>1</sup>H NMR and 77.16 ppm for <sup>13</sup>C NMR). The carbons directly attached to the boron atoms were not detected in some cases due to quadrupolar relaxation. All IR spectra were taken on a BRUKER TENSOR 27 FT-IR spectrometer. EI-HRMS spectra were obtained on a Waters Micromass G1540N/GCT Premier, and ESI-HRMS spectra were obtained on a Thermo Fisher Scientific LTQ FT Ultra or an Agilent Technologies 6224 TOF LC/MS. GC-MS analyses were performed on a Shimadzu QP2010 SE using a DB-5MS column (30 m, 0.25 mm I.D.).

### <sup>n</sup>BuLi-Promoted *anti*-Markovnikov Selective Hydroboration

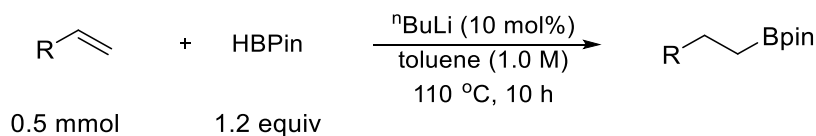

**General procedure A (GPA):** In a nitrogen-purged Schlenk tube containing a magnetic stirring bar, toluene (0.5 mL, 1.0 M), HBpin (87  $\mu$ L, 0.6 mmol, 1.2 equiv) and <sup>n</sup>BuLi (2.5 M in hexane, 20  $\mu$ L, 0.05 mmol, 10 mol %) were added sequentially. Then the mixture was stirred for 5 min at room temperature (rt). The  $\alpha$ -alkene substrate (0.5 mmol) was then added dropwise and the reaction mixture was stirred at 110  $^\circ$ C for 10 h. After completion of the reaction, the reaction mixture was allowed to cool to r.t. and quenched by HCl (1.0 M in EtOAc). Then the reaction mixture was directly filtered through a short pad of silica gel, eluting with EtOAc. The solvent was removed in vacuo. The linear/branched ratios of crude product mixtures were determined at this stage by GC-MS analysis. The product was purified by chromatography on silica gel.

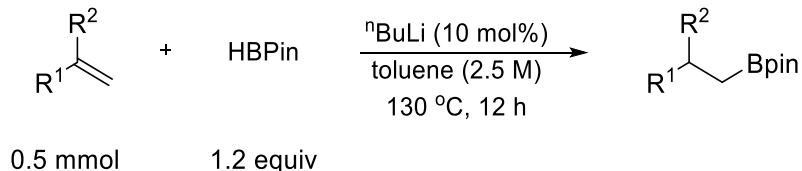

**General procedure B (GPB):** In a nitrogen-purged Schlenk tube containing a magnetic stirring bar, toluene (0.2 mL, 2.5 M), HBpin (87  $\mu$ L, 0.6 mmol, 1.2 equiv) and <sup>n</sup>BuLi (2.5 M in hexane, 20  $\mu$ L, 0.05 mmol, 10 mol %) were added sequentially. Then the mixture was stirred for 5 min at room temperature. The alkene or alkyne substrate (0.5 mmol) was then added dropwise and the reaction mixture was stirred at 130  $^\circ$ C for 12 h. After completion of the reaction, the reaction mixture was allowed to cool to r.t. and quenched by HCl (1.0 M in EtOAc). Then the reaction mixture was directly filtered through a short pad of silica gel, eluting with EtOAc. The solvent was removed in vacuo. The linear/branched ratios of crude product mixtures were determined at this stage by GC-MS analysis. The product was purified by chromatography on silica gel.

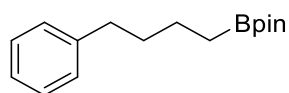

#### 4,4,5,5-tetramethyl-2-(4-phenylbutyl)-1,3,2-dioxaborolane (3a)

Following GPA using but-3-en-1-ylbenzene (66.1 mg, 0.5 mmol, 1.0 equiv), the crude product was purified by column chromatography (0-1% EtOAc in hexanes) to provide the title compound as a colorless liquid in 92% yield<sup>1</sup> (119.6 mg).

<sup>1</sup>H NMR (400 MHz, CDCl<sub>3</sub>) δ 7.2 (m, 2H), 7.1 (m, 3H), 2.5 (t, *J* = 8.0 Hz, 2H), 1.5 (m, 2H), 1.4 (m, 2H), 1.2 (s, 12H), 0.7 (t, *J* = 7.8 Hz, 2H).

<sup>13</sup>C NMR (101 MHz, CDCl<sub>3</sub>) δ 142.9, 128.4, 128.2, 125.5, 82.9, 35.8, 34.3, 24.9, 23.8.

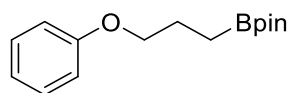

#### 4,4,5,5-tetramethyl-2-(3-phenoxypropyl)-1,3,2-dioxaborolane (3b)

Following GPA using (allyloxy)benzene (77.1 mg, 0.5 mmol, 1.0 equiv), the crude product was purified by column chromatography (0-1% EtOAc in hexanes) to provide the title compound as a colorless liquid in 90% yield<sup>2</sup> (118.0 mg).

<sup>1</sup>H NMR (400 MHz, CDCl<sub>3</sub>) δ 7.3 (m, 2H), 6.9 (m, 3H), 3.9 (t, *J* = 6.7 Hz, 2H), 1.9 (m, 2H), 1.2 (s, 12H), 0.9 (t, *J* = 7.8 Hz, 2H).

<sup>13</sup>C NMR (101 MHz, CDCl<sub>3</sub>) δ 159.3, 129.5, 120.5, 114.7, 83.2, 69.6, 24.9, 23.9.

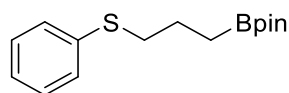

#### 4,4,5,5-tetramethyl-2-(3-(phenylthio)propyl)-1,3,2-dioxaborolane (3c)

Following GPA using allyl(phenyl)sulfane (75.1 mg, 0.5 mmol, 1.0 equiv), the crude product was purified by column chromatography (0-1% EtOAc in hexanes) to provide the title compound as a colorless liquid in 94% yield (130.5 mg).

<sup>1</sup>H NMR (400 MHz, CDCl<sub>3</sub>) δ 7.3 (d, *J* = 7.5 Hz, 2H), 7.3 (m, 2H), 7.1 (m, 1H), 2.9 (t, *J* = 8.0 Hz, 2H), 1.8 (m, 2H), 1.2 (s, 12H), 0.9 (t, *J* = 7.7 Hz, 2H).

<sup>13</sup>C NMR (101 MHz, CDCl<sub>3</sub>) δ 137.2, 128.9, 128.6, 125.5, 83.2, 35.6, 24.9, 24.0.

<sup>11</sup>B NMR (128 MHz, CDCl<sub>3</sub>) δ 34.09 (s).

**IR (neat, cm<sup>-1</sup>)** 1733, 1372, 1237, 1044, 913, 847, 729.

**HRMS (EI)** calculated for C<sub>15</sub>H<sub>23</sub>BO<sub>2</sub>S [M]<sup>+</sup> m/z 277.1543, found 277.1538.

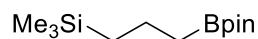

**trimethyl(3-(4,4,5,5-tetramethyl-1,3,2-dioxaborolan-2-yl)propyl)silane (3d)**

Following GPA using allyltrimethylsilane (57.1 mg, 0.5 mmol, 1.0 equiv), the crude product was purified by column chromatography (0-1% EtOAc in hexanes) to provide the title compound as a colorless liquid in 79 % yield<sup>6</sup> (95.6 mg).

**<sup>1</sup>H NMR (400 MHz, CDCl<sub>3</sub>)** δ 1.4 (m, 2H), 1.2 (s, 12H), 0.8 (t, *J* = 7.7 Hz, 2H), 0.5 (m, 2H), -0.1 (s, 9H).

**<sup>13</sup>C NMR (101 MHz, CDCl<sub>3</sub>)** δ 82.9, 25.0, 20.2, 18.7, -1.5.

**IR (neat, cm<sup>-1</sup>)** 2978, 1370, 1311, 1144, 865, 831, 757.

**HRMS (EI)** calculated for C<sub>11</sub>H<sub>24</sub>BO<sub>2</sub>Si [M-CH<sub>3</sub>]<sup>+</sup> m/z 226.1669, found 226.1673.

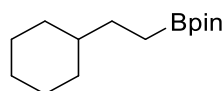

**2-(2-cyclohexylethyl)-4,4,5,5-tetramethyl-1,3,2-dioxaborolane (3e)**

Following GPA using vinylcyclohexane (55.1 mg, 0.5 mmol, 1.0 equiv), the crude product was purified by column chromatography (0-1% EtOAc in hexanes) to provide the title compound as a colorless liquid in 90% yield<sup>3</sup> (107.1 mg).

**<sup>1</sup>H NMR (400 MHz, CDCl<sub>3</sub>)** δ 1.7 (m, 5H), 1.2 (m, 18H), 0.8 (m, 2H), 0.7 (m, 2H).

**<sup>13</sup>C NMR (101 MHz, CDCl<sub>3</sub>)** δ 82.9, 40.1, 33.1, 31.5, 26.9, 26.6, 24.9.

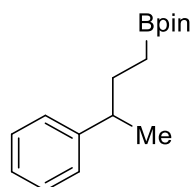

**4,4,5,5-tetramethyl-2-(3-phenylbutyl)-1,3,2-dioxaborolane (3f)**

Following GPA using but-3-en-2-ylbenzene (61.1 mg, 0.5 mmol, 1.0 equiv), the crude product was purified by column chromatography (0-1% EtOAc in hexanes) to provide the title compound as a colorless liquid in 92% yield (119.5 mg).

$^1\text{H NMR}$  (400 MHz,  $\text{CDCl}_3$ )  $\delta$  7.3 (m, 2H), 7.2 (m, 3H), 2.7 (m, 1H), 1.7 (m, 2H), 1.3 (m, 15H), 0.7 (m, 2H).

$^{13}\text{C NMR}$  (101 MHz,  $\text{CDCl}_3$ )  $\delta$  147.5, 128.2, 127.2, 125.7, 82.9, 42.2, 32.7, 24.8, 21.6.

$^{11}\text{B NMR}$  (128 MHz,  $\text{CDCl}_3$ )  $\delta$  34.34 (s).

**IR** (neat,  $\text{cm}^{-1}$ ) 1737, 1371, 1235, 1145, 1044, 846, 701.

**HRMS (ESI)** calculated for  $\text{C}_{16}\text{H}_{29}\text{BNO}_2$   $[\text{M}+\text{NH}_4]^+$   $m/z$  277.2321, found 277.2322.

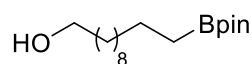

### 11-(4,4,5,5-tetramethyl-1,3,2-dioxaborolan-2-yl)undecan-1-ol (3g)

Following GPA using undec-10-en-1-ol (85.2 mg, 0.5 mmol, 1.0 equiv), the crude product was purified by column chromatography (10-20% EtOAc in hexanes) to provide the title compound as a colorless liquid in 85% yield (126.6 mg).

$^1\text{H NMR}$  (400 MHz,  $\text{CDCl}_3$ )  $\delta$  3.6 (t,  $J = 6.7$  Hz, 2H), 1.9 (s, 1H), 1.5 (m, 2H), 1.2 (m, 16H), 1.2 (s, 12H), 0.7 (t,  $J = 7.7$  Hz, 2H).

$^{13}\text{C NMR}$  (101 MHz,  $\text{CDCl}_3$ )  $\delta$  82.9, 63.0, 32.8, 32.5, 29.7, 29.6, 29.6, 29.5, 29.5, 25.8, 24.9, 24.0.

$^{11}\text{B NMR}$  (128 MHz,  $\text{CDCl}_3$ )  $\delta$  33.93.

**IR** (neat,  $\text{cm}^{-1}$ ) 3380, 2923, 1372, 1316, 1143, 967, 732.

**HRMS (ESI)** calculated for  $\text{C}_{17}\text{H}_{36}\text{BO}_3$   $[\text{M}+\text{H}]^+$   $m/z$  298.2788, found 298.2786.

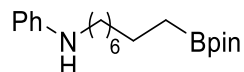

### N-(8-(4,4,5,5-tetramethyl-1,3,2-dioxaborolan-2-yl)octyl)aniline (3h)

Following GPA using N-(oct-7-en-1-yl)aniline (102.7 mg, 0.5 mmol, 1.0 equiv), the crude product was purified by column chromatography (10-20% EtOAc in hexanes) to provide the title compound as a colorless liquid in 77% yield (127.4 mg).

**<sup>1</sup>H NMR (400 MHz, CDCl<sub>3</sub>)** δ 7.2 (m, 2H), 6.7 (t, *J* = 7.3 Hz, 1H), 6.6 (d, *J* = 7.9 Hz, 2H), 3.6 (s, 1H), 3.1 (t, *J* = 7.1 Hz, 2H), 1.6 (m, 2H), 1.4 (m, 10H), 1.3 (s, 12H), 0.8 (t, *J* = 7.7 Hz, 2H).

**<sup>13</sup>C NMR (101 MHz, CDCl<sub>3</sub>)** δ 148.6, 129.2, 117.0, 112.7, 82.9, 44.0, 32.4, 29.6, 29.4, 29.4, 27.2, 24.9, 24.0.

**<sup>11</sup>B NMR (128 MHz, CDCl<sub>3</sub>)** δ 34.02.

**IR (neat, cm<sup>-1</sup>)** 2925, 1735, 1602, 1506, 1372, 1237, 1143, 731.

**HRMS (ESI)** calculated for C<sub>20</sub>H<sub>35</sub>BNO<sub>2</sub> [M+H]<sup>+</sup> *m/z* 331.2792, found 331.2791.

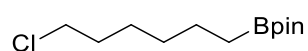

**2-(6-chlorohexyl)-4,4,5,5-tetramethyl-1,3,2-dioxaborolane (3i)**

Following GPA using 6-chlorohex-1-ene (59.3 mg, 0.5 mmol, 1.0 equiv), the crude product was purified by column chromatography (0-1% EtOAc in hexanes) to provide the title compound as a colorless liquid in 81% yield<sup>4</sup> (169.8 mg).

**<sup>1</sup>H NMR (400 MHz, CDCl<sub>3</sub>)** δ 3.5 (t, *J* = 6.8 Hz, 2H), 1.7 (m, 2H), 1.4 (m, 4H), 1.3 (m, 2H), 1.2 (s, 12H), 0.7 (t, *J* = 7.6 Hz, 2H).

**<sup>13</sup>C NMR (101 MHz, CDCl<sub>3</sub>)** δ 83.0, 45.2, 32.6, 31.6, 26.7, 24.9, 23.9.

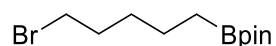

**2-(5-bromopentyl)-4,4,5,5-tetramethyl-1,3,2-dioxaborolane (3j)**

Following GPA using 5-bromopent-1-ene (78.5 mg, 0.5 mmol, 1.0 equiv), the crude product was purified by column chromatography (0-1% EtOAc in hexanes) to provide the title compound as a colorless liquid in 88% yield<sup>5</sup> (121.5 mg).

**<sup>1</sup>H NMR (400 MHz, CDCl<sub>3</sub>)** δ 3.4 (t, *J* = 6.9 Hz, 2H), 1.8 (m, 2H), 1.4 (m, 4H), 1.2 (s, 12H), 0.8 (t, *J* = 7.3 Hz, 2H).

**<sup>13</sup>C NMR (101 MHz, CDCl<sub>3</sub>)** δ 83.0, 34.1, 32.7, 30.9, 24.9, 23.3.

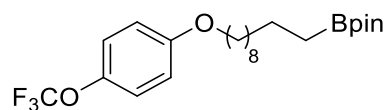

**4,4,5,5-tetramethyl-2-(10-(4-(trifluoromethoxy)phenoxy)decyl)-1,3,2-dioxaborolane (3k)**

Following GPA using 1-(dec-9-en-1-yloxy)-4-(trifluoromethoxy)benzene (158.2 mg, 0.5 mmol, 1.0 equiv), the crude product was purified by column chromatography (0-1% EtOAc in hexanes) to provide the title compound as a colorless liquid in 87% yield (193.1 mg).

<sup>1</sup>H NMR (400 MHz, CDCl<sub>3</sub>) δ 7.1 (d, *J* = 8.8 Hz, 2H), 6.9 (d, *J* = 9.1 Hz, 2H), 3.9 (t, *J* = 6.5 Hz, 2H), 1.8 (m, 2H), 1.3 (m, 14H), 1.2 (s, 12H), 0.8 (t, *J* = 7.7 Hz, 2H).

<sup>13</sup>C NMR (101 MHz, CDCl<sub>3</sub>) δ 157.6, 142.4, 122.3, 120.6 (q, *J* = 256.5 Hz), 115.1, 82.8, 68.4, 32.4, 29.5, 29.5, 29.3, 29.3, 29.2, 26.0, 24.7, 24.0.

<sup>19</sup>F NMR (377 MHz, CDCl<sub>3</sub>) δ -58.4.

<sup>11</sup>B NMR (128 MHz, CDCl<sub>3</sub>) δ 34.0.

IR (neat, cm<sup>-1</sup>) 1736, 1507, 1373, 1239, 1045, 913, 730.

HRMS (ESI) calculated for C<sub>23</sub>H<sub>40</sub>BF<sub>3</sub>NO<sub>4</sub> [M+NH<sub>4</sub>]<sup>+</sup> m/z 461.3033, found 461.3020.

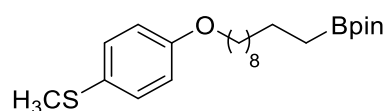

**4,4,5,5-tetramethyl-2-(10-(4-(trifluoromethoxy)phenoxy)decyl)-1,3,2-dioxaborolane (3l)**

Following GPA using (4-(dec-9-en-1-yloxy)phenyl)(methyl)sulfane (189.2 mg, 0.5 mmol, 1.0 equiv), the crude product was purified by column chromatography (0-1% EtOAc in hexanes) to provide the title compound as a colorless liquid in 94% yield (190.8 mg).

<sup>1</sup>H NMR (400 MHz, CDCl<sub>3</sub>) δ 7.2 (d, *J* = 8.7 Hz, 2H), 6.8 (d, *J* = 8.7 Hz, 2H), 3.9 (t, *J* = 6.6 Hz, 2H), 2.4 (s, 3H), 1.8 (m, 2H), 1.3 (m, 14H), 1.2 (s, 12H), 0.8 (t, *J* = 7.7 Hz, 2H).

<sup>13</sup>C NMR (101 MHz, CDCl<sub>3</sub>) δ 157.8, 130.2, 128.4, 115.2, 82.9, 68.1, 32.5, 29.6, 29.6, 29.4, 29.3, 26.1, 24.9, 24.1, 18.2.

<sup>11</sup>B NMR (128 MHz, CDCl<sub>3</sub>) δ 33.95.

IR (neat, cm<sup>-1</sup>) 1732, 1493, 1238, 1044, 910, 847, 728.



**HRMS (ESI)** calculated for C<sub>23</sub>H<sub>43</sub>BNO<sub>3</sub>S [M+NH<sub>4</sub>]<sup>+</sup> m/z 423.3088, found 423.3068.

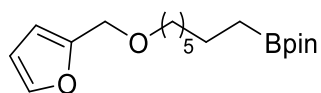

**2-(7-(furan-2-ylmethoxy)heptyl)-4,4,5,5-tetramethyl-1,3,2-dioxaborolane (3m)**

Following **GPA** using 2-((hept-6-en-1-yloxy)methyl)furan (97.2 mg, 0.5 mmol, 1.0 equiv), the crude product was purified by column chromatography (5-10% EtOAc in hexanes) to provide the title compound as a yellow liquid in 70% yield (112.7 mg).

**<sup>1</sup>H NMR (400 MHz, CDCl<sub>3</sub>)** δ 7.4 (dd, *J* = 1.7, 0.8 Hz, 1H), 6.3 (m, 2H), 4.4 (s, 2H), 3.4 (t, *J* = 6.8 Hz, 2H), 1.6 (m, 2H), 1.3 (m, 8H), 1.2 (s, 12H), 0.7 (t, *J* = 7.7 Hz, 2H).

**<sup>13</sup>C NMR (101 MHz, CDCl<sub>3</sub>)** δ 152.1, 142.6, 110.1, 108.9, 82.8, 70.4, 64.7, 32.3, 29.6, 29.2, 26.0, 24.8, 23.9.

**<sup>11</sup>B NMR (128 MHz, CDCl<sub>3</sub>)** δ 35.27.

**IR (neat, cm<sup>-1</sup>)** 2928, 1736, 1464, 1372, 1239, 1145, 731.

**HRMS (ESI)** calculated for C<sub>18</sub>H<sub>35</sub>BNO<sub>4</sub> [M+NH<sub>4</sub>]<sup>+</sup> m/z 339.2690, found 339.2690.

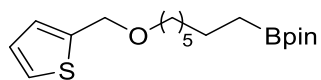

**4,4,5,5-tetramethyl-2-(7-(thiophen-2-ylmethoxy)heptyl)-1,3,2-dioxaborolane (3n)**

Following **GPA** using 2-((hept-6-en-1-yloxy)methyl)thiophene (105.2 mg, 0.5 mmol, 1.0 equiv), the crude product was purified by column chromatography (5-10% EtOAc in hexanes) to provide the title compound as a colorless liquid in 75% yield (126.5 mg).

**<sup>1</sup>H NMR (400 MHz, CDCl<sub>3</sub>)** δ 7.2 (dd, *J* = 4.9, 1.2 Hz, 1H), 7.0 (m, 2H), 4.6 (s, 2H), 3.4 (t, *J* = 6.7 Hz, 2H), 1.6 (p, *J* = 6.7 Hz, 2H), 1.3 (m, 8H), 1.2 (s, 12H), 0.7 (t, *J* = 7.7 Hz, 2H).

**<sup>13</sup>C NMR (101 MHz, CDCl<sub>3</sub>)** δ 141.5, 126.5, 126.1, 125.6, 82.8, 70.2, 67.3, 32.3, 29.6, 29.2, 26.0, 24.8, 23.9.

**<sup>11</sup>B NMR (128 MHz, CDCl<sub>3</sub>)** δ 34.56.

**IR (neat, cm<sup>-1</sup>)** 1732, 1446, 1238, 1044, 911, 728.

**HRMS (ESI)** calculated for C<sub>18</sub>H<sub>35</sub>BNO<sub>3</sub>S [M+NH<sub>4</sub>]<sup>+</sup> m/z 355.2462, found 355.2463.

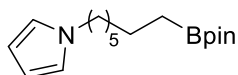

**1-(7-(4,4,5,5-tetramethyl-1,3,2-dioxaborolan-2-yl)heptyl)-1H-pyrrole (3o)**

Following GPA using 1-(hept-6-en-1-yl)-1H-pyrrole (82.0 mg, 0.5 mmol, 1.0 equiv), the crude product was purified by column chromatography (10-20% EtOAc in hexanes) to provide the title compound as a yellow liquid in 80% yield (116.4 mg).

**<sup>1</sup>H NMR (400 MHz, CDCl<sub>3</sub>)** δ 6.6 (t, *J* = 2.1 Hz, 2H), 6.1 (t, *J* = 2.1 Hz, 2H), 3.9 (t, *J* = 7.2 Hz, 2H), 1.8 (m, 2H), 1.4 (t, *J* = 6.8 Hz, 2H), 1.3 (m, 18H), 0.8 (t, *J* = 7.7 Hz, 2H).

**<sup>13</sup>C NMR (101 MHz, CDCl<sub>3</sub>)** δ 120.4, 107.7, 82.9, 49.6, 32.2, 31.6, 28.9, 26.7, 24.8, 23.9.

**<sup>11</sup>B NMR (128 MHz, CDCl<sub>3</sub>)** δ 34.54.

**IR (neat, cm<sup>-1</sup>)** 2929, 1736, 1372, 1237, 1044, 914, 727.

**HRMS (ESI)** calculated for C<sub>17</sub>H<sub>31</sub>BNO<sub>2</sub> [M+H]<sup>+</sup> *m/z* 291.2479, found 291.2480.

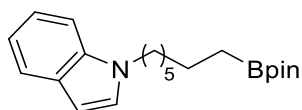

**1-(7-(4,4,5,5-tetramethyl-1,3,2-dioxaborolan-2-yl)heptyl)-1H-indole (3p)**

Following GPA using 1-(hept-6-en-1-yl)-1H-indole (106.6 mg, 0.5 mmol, 1.0 equiv), the crude product was purified by column chromatography (10-20% EtOAc in hexanes) to provide the title compound as a yellow liquid in 80% yield (136.4 mg).

**<sup>1</sup>H NMR (400 MHz, CDCl<sub>3</sub>)** δ 7.7 (d, *J* = 7.9 Hz, 1H), 7.4 (d, *J* = 8.2 Hz, 1H), 7.3 (m, 1H), 7.1 (m, 2H), 6.5 (m, 1H), 4.1 (t, *J* = 7.2 Hz, 2H), 1.9 (m, 2H), 1.4 (m, 2H), 1.3 (s, 18H), 0.8 (t, *J* = 7.7 Hz, 2H).

**<sup>13</sup>C NMR (101 MHz, CDCl<sub>3</sub>)** δ 135.9, 128.6, 127.8, 121.3, 120.9, 119.1, 109.4, 100.8, 82.9, 46.4, 32.3, 30.3, 29.1, 27.0, 24.9, 24.0.

**<sup>11</sup>B NMR (128 MHz, CDCl<sub>3</sub>)** δ 34.61.

**IR (neat, cm<sup>-1</sup>)** 2982, 1734, 1372, 1238, 1044, 910, 729.

**HRMS (ESI)** calculated for C<sub>21</sub>H<sub>33</sub>BNO<sub>2</sub> [M+H]<sup>+</sup> *m/z* 341.2635, found 341.2633.

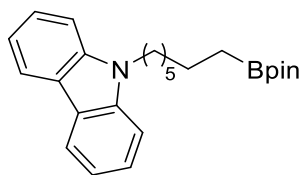

**9-(7-(4,4,5,5-tetramethyl-1,3,2-dioxaborolan-2-yl)heptyl)-9H-carbazole (3q)**

Following GPA using 9-(hept-6-en-1-yl)-9H-carbazole (132.2 mg, 0.5 mmol, 1.0 equiv), the crude product was purified by column chromatography (10-20% EtOAc in hexanes) to provide the title compound as a purple liquid in 72% yield (140.5 mg).

**<sup>1</sup>H NMR (400 MHz, CDCl<sub>3</sub>)** δ 8.2 (d, *J* = 7.7 Hz, 2H), 7.5 (m, 2H), 7.4 (d, *J* = 8.2 Hz, 2H), 7.3 (m, 2H), 4.3 (t, *J* = 7.3 Hz, 2H), 1.9 (m, 2H), 1.4 (m, 8H), 1.3 (s, 12H), 0.8 (t, *J* = 7.8 Hz, 2H).

**<sup>13</sup>C NMR (101 MHz, CDCl<sub>3</sub>)** δ 140.4, 125.6, 122.8, 120.4, 118.7, 108.7, 82.9, 43.1, 32.4, 29.2, 29.0, 27.3, 24.9, 24.0.

**<sup>11</sup>B NMR (128 MHz, CDCl<sub>3</sub>)** δ 34.48.

**IR (neat, cm<sup>-1</sup>)** 2976, 1737, 1484, 1372, 1348, 1144, 749.

**HRMS (ESI)** calculated for C<sub>25</sub>H<sub>35</sub>BN<sub>2</sub>O<sub>2</sub> [M+H]<sup>+</sup> *m/z* 391.2792, found 391.2793.

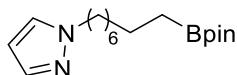

**1-(8-(4,4,5,5-tetramethyl-1,3,2-dioxaborolan-2-yl)octyl)-1H-pyrazole (3r)**

Following GPA using 1-(oct-7-en-1-yl)-1H-pyrazole (89.0 mg, 0.5 mmol, 1.0 equiv), the crude product was purified by column chromatography (10-20% EtOAc in hexanes) to provide the title compound as a colorless liquid in 83% yield (127.0 mg).

**<sup>1</sup>H NMR (400 MHz, CDCl<sub>3</sub>)** δ 7.4 (d, *J* = 1.7 Hz, 1H), 7.3 (d, *J* = 2.1 Hz, 1H), 6.2 (d, *J* = 2.0 Hz, 1H), 4.1 (t, *J* = 7.2 Hz, 2H), 1.8 (m, 2H), 1.3 (m, 10H), 1.2 (s, 12H), 0.7 (t, *J* = 7.7 Hz, 2H).

**<sup>13</sup>C NMR (101 MHz, CDCl<sub>3</sub>)** δ 139.0, 128.8, 105.1, 82.9, 52.2, 32.3, 30.5, 29.2, 29.1, 26.6, 24.8, 23.9.

**<sup>11</sup>B NMR (128 MHz, CDCl<sub>3</sub>)** δ 33.94.

**IR (neat, cm<sup>-1</sup>)** 2925, 1513, 1373, 1317, 1144, 967, 747.

**HRMS (ESI)** calculated for C<sub>17</sub>H<sub>32</sub>BN<sub>2</sub>O<sub>2</sub> [M+H]<sup>+</sup> *m/z* 306.2588, found 306.2588.

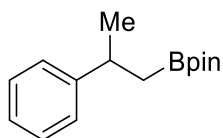

#### 4,4,5,5-tetramethyl-2-(2-phenylpropyl)-1,3,2-dioxaborolane (5a)

Following **GPB** using prop-1-en-2-ylbenzene (59.2 mg, 0.5 mmol, 1.0 equiv), the crude product was purified by column chromatography (0-10% EtOAc in hexanes) to provide the title compound as a colorless liquid in 93% yield<sup>7</sup> (114.4 mg).

<sup>1</sup>H NMR (400 MHz, CDCl<sub>3</sub>) δ 7.2 (m, 4H), 7.1 (m, 1H), 3.0 (m, 1H), 1.3 (d, *J* = 6.9 Hz, 3H), 1.2 (m, 14H).

<sup>13</sup>C NMR (101 MHz, CDCl<sub>3</sub>) δ 149.2, 128.2, 126.6, 125.7, 83.0, 35.8, 24.9, 24.8, 24.7.

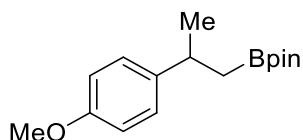

#### 2-(2-(4-methoxyphenyl)propyl)-4,4,5,5-tetramethyl-1,3,2-dioxaborolane (5b)

Following **GPB** using 1-methoxy-4-(prop-1-en-2-yl)benzene (74.1 mg, 0.5 mmol, 1.0 equiv), the crude product was purified by column chromatography (0-10% EtOAc in hexanes) to provide the title compound as a colorless liquid in 64% yield<sup>8</sup> (88.3 mg).

<sup>1</sup>H NMR (400 MHz, CDCl<sub>3</sub>) δ 7.2 (d, *J* = 8.6 Hz, 2H), 6.8 (d, *J* = 8.5 Hz, 2H), 3.8 (s, 3H), 3.0 (m, 1H), 1.3 (d, *J* = 6.9 Hz, 3H), 1.2 (s, 12H), 1.1 (m, 2H).

<sup>13</sup>C NMR (101 MHz, CDCl<sub>3</sub>) δ 157.7, 141.5, 127.5, 113.6, 83.0, 55.3, 35.1, 25.3, 24.9, 24.8.

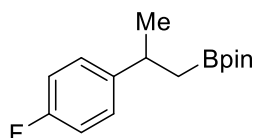

#### 2-(2-(4-fluorophenyl)propyl)-4,4,5,5-tetramethyl-1,3,2-dioxaborolane (5c)

Following **GPB** using 1-fluoro-4-(prop-1-en-2-yl)benzene (68.2 mg, 0.5 mmol, 1.0 equiv), the crude product was purified by column chromatography (0-10% EtOAc in hexanes) to provide the title compound as a colorless liquid in 88% yield<sup>9</sup> (116.1 mg).

**<sup>1</sup>H NMR (400 MHz, CDCl<sub>3</sub>)** δ 7.2 (m, 2H), 6.9 (t, *J* = 8.7 Hz, 2H), 3.0 (m, 1H), 1.2 (d, *J* = 6.9 Hz, 3H), 1.1 (m, 14H).

**<sup>13</sup>C NMR (101 MHz, CDCl<sub>3</sub>)** δ 161.2 (d, *J* = 244.4 Hz), 144.9 (d, *J* = 3.0 Hz), 128.1 (d, *J* = 8.1 Hz), 114.9 (d, *J* = 21.2 Hz), 83.2, 35.3, 25.3, 24.9, 24.8.

**<sup>19</sup>F NMR (376 MHz, CDCl<sub>3</sub>)** δ -118.2.

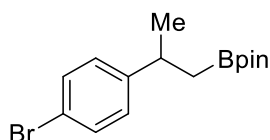

#### **2-(2-(4-bromophenyl)propyl)-4,4,5,5-tetramethyl-1,3,2-dioxaborolane (5d)**

Following **GPB** using 1-bromo-4-(prop-1-en-2-yl)benzene (98.5 mg, 0.5 mmol, 1.0 equiv), the crude product was purified by column chromatography (0-10% EtOAc in hexanes) to provide the title compound as a colorless liquid in 79% yield<sup>10</sup> (128.0 mg).

**<sup>1</sup>H NMR (400 MHz, CDCl<sub>3</sub>)** δ 7.4 (d, *J* = 8.2 Hz, 2H), 7.1 (d, *J* = 8.1 Hz, 2H), 3.0 (m, 1H), 1.2 (d, *J* = 6.9 Hz, 3H), 1.2 (s, 12H), 1.1 (d, *J* = 7.8 Hz, 2H).

**<sup>13</sup>C NMR (101 MHz, CDCl<sub>3</sub>)** δ 148.2, 131.2, 128.5, 119.2, 83.1, 35.3, 24.8, 24.7, 24.7.

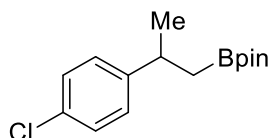

#### **2-(2-(4-chlorophenyl)propyl)-4,4,5,5-tetramethyl-1,3,2-dioxaborolane (5e)**

Following **GPB** using 1-chloro-4-(prop-1-en-2-yl)benzene (76.3 mg, 0.5 mmol, 1.0 equiv), the crude product was purified by column chromatography (0-10% EtOAc in hexanes) to provide the title compound as a colorless liquid in 88% yield<sup>10</sup> (123.0 mg).

**<sup>1</sup>H NMR (400 MHz, CDCl<sub>3</sub>)** δ 7.2 (d, *J* = 8.5 Hz, 2H), 7.2 (d, *J* = 8.4 Hz, 2H), 3.0 (m, 1H), 1.2 (d, *J* = 6.9 Hz, 3H), 1.2 (s, 12H), 1.1 (d, *J* = 7.8 Hz, 2H).

**<sup>13</sup>C NMR (101 MHz, CDCl<sub>3</sub>)** δ 147.8, 131.3, 128.3, 128.1, 83.2, 35.4, 25.0, 24.9, 24.8.

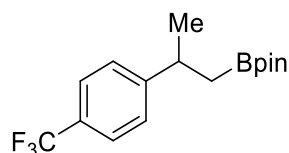

**4,4,5,5-tetramethyl-2-(2-(4-(trifluoromethyl)phenyl)propyl)-1,3,2-dioxaborolane (5f)**

Following **GPB** using 1-(prop-1-en-2-yl)-4-(trifluoromethyl)benzene (93.1 mg, 0.5 mmol, 1.0 equiv), the crude product was purified by column chromatography (0-10% EtOAc in hexanes) to provide the title compound as a colorless liquid in 80% yield<sup>8</sup> (125.5 mg).

**<sup>1</sup>H NMR (400 MHz, CDCl<sub>3</sub>)**  $\delta$  7.5 (m, 2H), 7.3 (m, 2H), 3.1 (m, 1H), 1.3 (d,  $J = 6.9$  Hz, 3H), 1.2 (m, 14H).

**<sup>13</sup>C NMR (101 MHz, CDCl<sub>3</sub>)**  $\delta$  153.4, 128.2 (q,  $J = 32.3$  Hz), 127.1, 125.3 (q,  $J = 4.0$  Hz), 124.6 (q,  $J = 272.7$  Hz), 83.3, 35.9, 24.9, 24.8, 24.7.

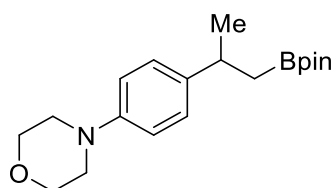

**4-(4-(1-(4,4,5,5-tetramethyl-1,3,2-dioxaborolan-2-yl)propyl)phenyl)morpholine (5g)**

Following **GPB** using 4-(4-(prop-1-en-2-yl)phenyl)morpholine (101.6 mg, 0.5 mmol, 1.0 equiv), the crude product was purified by column chromatography (10-20% EtOAc in hexanes) to provide the title compound as a yellow liquid in 70% yield (115.8 mg).

**<sup>1</sup>H NMR (400 MHz, CDCl<sub>3</sub>)**  $\delta$  7.2 (d,  $J = 8.5$  Hz, 2H), 6.8 (d,  $J = 8.6$  Hz, 2H), 3.8 (m, 4H), 3.1 (m, 4H), 3.0 (m, 1H), 1.2 (d,  $J = 6.9$  Hz, 3H), 1.2 (s, 12H), 1.1 (m, 2H).

**<sup>13</sup>C NMR (101 MHz, CDCl<sub>3</sub>)**  $\delta$  149.3, 141.1, 127.2, 115.8, 82.9, 67.0, 49.8, 34.9, 24.9, 24.8, 24.7.

**<sup>11</sup>B NMR (128 MHz, CDCl<sub>3</sub>)**  $\delta$  34.50.

**IR (neat, cm<sup>-1</sup>)** 1611, 1514, 1365, 1143, 1119, 968, 729.

**HRMS (ESI)** calculated for C<sub>19</sub>H<sub>31</sub>BNO<sub>3</sub> [M+H]<sup>+</sup> m/z 331.2428, found 331.2428.

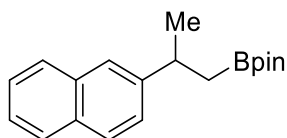

**4,4,5,5-tetramethyl-2-(2-(naphthalen-2-yl)propyl)-1,3,2-dioxaborolane (5h)**

Following **GPB** using 2-(prop-1-en-2-yl)naphthalene (84.1 mg, 0.5 mmol, 1.0 equiv), the crude product was purified by column chromatography (0-10% EtOAc in hexanes) to provide the title compound as a white solid in 91% yield<sup>11</sup> (134.5 mg).

**<sup>1</sup>H NMR (400 MHz, CDCl<sub>3</sub>)** δ 7.8 (m, 3H), 7.7 (s, 1H), 7.4 (m, 3H), 3.3 (m, 1H), 1.4 (d, *J* = 6.9 Hz, 3H), 1.3 (m, 2H), 1.2 (s, 12H).

**<sup>13</sup>C NMR (101 MHz, CDCl<sub>3</sub>)** δ 146.8, 133.7, 132.2, 127.8, 127.7, 127.6, 125.9, 125.8, 125.0, 124.5, 83.1, 36.0, 24.9, 24.8.

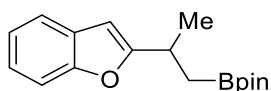

**2-(2-(benzofuran-2-yl)propyl)-4,4,5,5-tetramethyl-1,3,2-dioxaborolane (5i)**

Following **GPB** using 2-(prop-1-en-2-yl)benzofuran (79.1 mg, 0.5 mmol, 1.0 equiv), the crude product was purified by column chromatography (0-10% EtOAc in hexanes) to provide the title compound as a colorless liquid in 60% yield<sup>15</sup> (86.0 mg).

**<sup>1</sup>H NMR (400 MHz, CDCl<sub>3</sub>)** δ 7.5 (m, 1H), 7.4 (d, *J* = 7.6 Hz, 1H), 7.2 (m, 2H), 6.4 (s, 1H), 3.2 (m, 1H), 1.4 (d, *J* = 6.9 Hz, 3H), 1.3 (m, 1H), 1.2 (s, 12H), 1.1 (m, 1H).

**<sup>13</sup>C NMR (101 MHz, CDCl<sub>3</sub>)** δ 165.4, 154.6, 129.1, 123.1, 122.3, 120.4, 110.8, 99.9, 83.3, 29.7, 25.0, 24.9, 21.5.

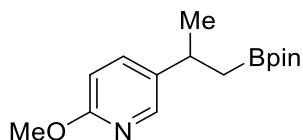

**2-methoxy-5-(1-(4,4,5,5-tetramethyl-1,3,2-dioxaborolan-2-yl)propan-2-yl)pyridine (5j)**

Following **GPB** using 2-methoxy-5-(prop-1-en-2-yl)pyridine (74.6 mg, 0.5 mmol, 1.0 equiv), the crude product was purified by column chromatography (5-10% EtOAc in hexanes) to provide the title compound as a colorless liquid in 82% yield (113.5 mg).

**<sup>1</sup>H NMR (400 MHz, CDCl<sub>3</sub>)** δ 8.0 (s, 1H), 7.4 (d, *J* = 8.5, 1H), 6.6 (d, *J* = 8.5 Hz, 1H), 3.9 (s, 3H), 3.0 (m, 1H), 1.2 (d, *J* = 6.9 Hz, 3H), 1.1 (s, 12H), 1.1 (d, *J* = 7.8 Hz, 2H).

**<sup>13</sup>C NMR (101 MHz, CDCl<sub>3</sub>)** δ 162.6, 144.9, 137.2, 137.0, 110.4, 83.2, 53.4, 32.6, 24.9, 24.9, 24.8.

**<sup>11</sup>B NMR (128 MHz, CDCl<sub>3</sub>)** δ 33.93.

**IR (neat, cm<sup>-1</sup>)** 2976, 1606, 1492, 1366, 1281, 1144, 1030.

**HRMS (ESI)** calculated for C<sub>15</sub>H<sub>25</sub>BNO<sub>3</sub> [M+H]<sup>+</sup> *m/z* 277.1958, found 277.1960.

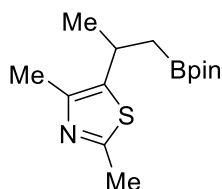

**2,4-dimethyl-5-(1-(4,4,5,5-tetramethyl-1,3,2-dioxaborolan-2-yl)propan-2-yl)thiazole (5k)**

Following **GPB** using 2,4-dimethyl-5-(prop-1-en-2-yl)thiazole (76.6 mg, 0.5 mmol, 1.0 equiv), the crude product was purified by column chromatography (5-10% EtOAc in hexanes) to provide the title compound as a colorless liquid in 59% yield (82.0 mg).

**<sup>1</sup>H NMR (400 MHz, CDCl<sub>3</sub>)** δ 3.3 (m, 1H), 2.6 (s, 3H), 2.3 (s, 3H), 1.2 (d, *J* = 6.9 Hz, 3H), 1.2 (s, 12H), 1.1 (d, *J* = 7.7 Hz, 2H).

**<sup>13</sup>C NMR (101 MHz, CDCl<sub>3</sub>)** δ 161.4, 145.1, 140.2, 28.8, 26.0, 24.9, 24.7, 19.2, 15.1.

**<sup>11</sup>B NMR (128 MHz, CDCl<sub>3</sub>)** δ 33.61.

**IR (neat, cm<sup>-1</sup>)** 1734, 1372, 1097, 1044, 913, 847, 729.

**HRMS (ESI)** calculated for C<sub>14</sub>H<sub>25</sub>BNO<sub>2</sub>S [M+H]<sup>+</sup> *m/z* 281.1730, found 281.1732.

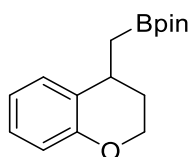

**2-(chroman-4-ylmethyl)-4,4,5,5-tetramethyl-1,3,2-dioxaborolane (5l)**



Following **GPB** using 4-methylenechromane (73.1 mg, 0.5 mmol, 1.0 equiv), the crude product was purified by column chromatography (0-10% EtOAc in hexanes) to provide the title compound as a colorless liquid in 72% yield<sup>14</sup> (99.0 mg).

**<sup>1</sup>H NMR (400 MHz, CDCl<sub>3</sub>)** δ 7.2 (d, *J* = 7.6, 1H), 7.1 (t, *J* = 7.7, 1H), 6.8 (t, *J* = 7.4, 1H), 6.8 (d, *J* = 8.2, 1H), 4.2 (m, 1H), 4.2 (m, 1H), 3.1 (m, 1H), 2.1 (m, 1H), 1.8 (m, 1H), 1.4 (m, 1H), 1.3 (d, *J* = 9.8 Hz, 12H), 1.1 (m, 1H).

**<sup>13</sup>C NMR (101 MHz, CDCl<sub>3</sub>)** δ 154.3, 128.9, 128.4, 127.2, 120.2, 116.7, 83.4, 64.1, 30.1, 29.9, 25.1, 24.8.

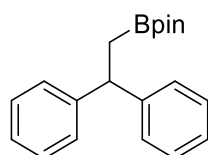

#### **2-(2,2-diphenylethyl)-4,4,5,5-tetramethyl-1,3,2-dioxaborolane (5m)**

Following **GPB** using ethene-1,1-diylidibenzene (90.2 mg, 0.5 mmol, 1.0 equiv), the crude product was purified by column chromatography (0-10% EtOAc in hexanes) to provide the title compound as a colorless liquid in 98% yield<sup>12</sup> (150.0 mg).

**<sup>1</sup>H NMR (400 MHz, CDCl<sub>3</sub>)** δ 7.3 (m, 8H), 7.1 (m, 2H), 4.3 (t, *J* = 8.5 Hz, 1H), 1.6 (d, *J* = 8.5 Hz, 2H), 1.0 (s, 12H).

**<sup>13</sup>C NMR (101 MHz, CDCl<sub>3</sub>)** δ 146.6, 128.3, 127.7, 125.9, 83.1, 46.6, 24.6.

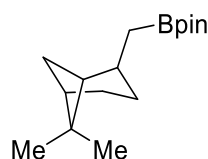

#### **2-((6,6-dimethylbicyclo[3.1.1]heptan-2-yl)methyl)-4,4,5,5-tetramethyl-1,3,2-dioxaborolane (5n)**

Following **GPB** using 6,6-dimethyl-2-methylenebicyclo[3.1.1]heptane (68.1 mg, 0.5 mmol, 1.0 equiv), the crude product was purified by column chromatography (0-10% EtOAc in hexanes) to provide the title compound as a colorless liquid in 84% yield (110.5 mg).

**<sup>1</sup>H NMR (400 MHz, CDCl<sub>3</sub>)** δ 2.2 (m, 1H), 2.0 (m, 1H), 1.8 (m, 1H), 1.7 (m, 3H), 1.6 (m, 1H), 1.3 (d, *J* = 9.9 Hz, 1H), 1.2 (s, 14H), 1.2 (s, 3H), 0.8 (s, 3H), 0.7 (m, 1H).

**<sup>13</sup>C NMR (101 MHz, CDCl<sub>3</sub>)** δ 82.8, 48.6, 40.7, 39.6, 31.2, 26.9, 24.8, 24.7, 24.3, 23.1, 20.2.

**<sup>11</sup>B NMR (128 MHz, CDCl<sub>3</sub>)** δ 34.11.

**IR (neat, cm<sup>-1</sup>)** 2981, 1735, 1464, 1372, 1234, 913, 730.

**HRMS (EI)** calculated for C<sub>16</sub>H<sub>29</sub>BO<sub>2</sub> [M]<sup>+</sup> *m/z* 263.2291, found 263.2286.

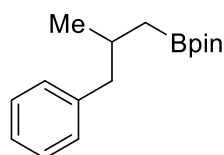

#### **4,4,5,5-tetramethyl-2-(2-methyl-3-phenylpropyl)-1,3,2-dioxaborolane (5o)**

Following GPB using (2-methylallyl)benzene (61.1 mg, 0.5 mmol, 1.0 equiv), the crude product was purified by column chromatography (0-10% EtOAc in hexanes) to provide the title compound as a colorless liquid in 78% yield<sup>13</sup> (101.0mg).

**<sup>1</sup>H NMR (400 MHz, CDCl<sub>3</sub>)** δ 7.3 (m, 2H), 7.2 (m, 3H), 2.6 (m, 1H), 2.4 (m, 1H), 2.0 (m, 1H), 1.2 (s, 12H), 0.9 (m, 4H), 0.7 (m, 1H).

**<sup>13</sup>C NMR (101 MHz, CDCl<sub>3</sub>)** δ 141.8, 129.4, 128.1, 125.7, 83.0, 46.2, 31.9, 25.0, 24.9, 22.1.

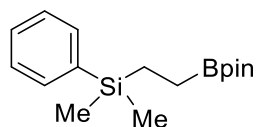

#### **dimethyl(phenyl)(2-(4,4,5,5-tetramethyl-1,3,2-dioxaborolan-2-yl)ethyl)silane (5p)**

Following GPB using dimethyl(phenyl)(vinyl)silane (81.2 mg, 0.5 mmol, 1.0 equiv), the crude product was purified by column chromatography (0-10% EtOAc in hexanes) to provide the title compound as a colorless liquid in 85% yield<sup>16</sup> (123.0 mg).

**<sup>1</sup>H NMR (400 MHz, CDCl<sub>3</sub>)** δ 7.5 (m, 2H), 7.3 (m, 3H), 1.2 (s, 12H), 0.8 (m, 4H), 0.2 (s, 6H).

**<sup>13</sup>C NMR (101 MHz, CDCl<sub>3</sub>)** δ 139.4, 133.7, 128.7, 127.6, 83.0, 24.8, 8.5, -3.5.

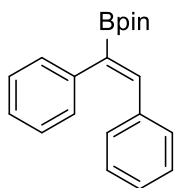

**(Z)-2-(1,2-diphenylvinyl)-4,4,5,5-tetramethyl-1,3,2-dioxaborolane (7a)**

Following **GPB** using 1,2-diphenylethyne (89.0 mg, 0.5 mmol, 1.0 equiv), the crude product was purified by column chromatography (0-5% EtOAc in hexanes) to provide the title compound as a yellow solid in 85% yield<sup>17</sup> (130 mg).

<sup>1</sup>H NMR (400 MHz, CDCl<sub>3</sub>) δ 7.4 (s, 1H), 7.2 (m, 2H), 7.2 (m, 3H), 7.1 (m, 5H), 1.3 (s, 12H).

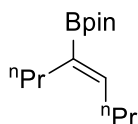

**(Z)-4,4,5,5-tetramethyl-2-(oct-4-en-4-yl)-1,3,2-dioxaborolane (7b)**

(4.8: 1 mixture of E/Z isomer)

Following **GPB** using oct-4-yne (55.0 mg, 0.5 mmol, 1.0 equiv), the crude product was purified by column chromatography (0-5% EtOAc in hexanes) to provide the title compound as a colorless liquid in 92% yield<sup>18</sup> (108 mg).

<sup>1</sup>H NMR (400 MHz, CDCl<sub>3</sub>) δ 6.3 (t, *J* = 7.1 Hz, 1H), 2.1 (m, 4H), 1.4 (m, 4H), 1.2 (s, 12H), 0.9 (m, 6H).

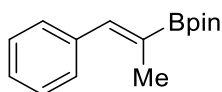

**(Z)-4,4,5,5-tetramethyl-2-(1-phenylprop-1-en-1-yl)-1,3,2-dioxaborolane (7c)**

(2: 1 mixture of regioisomer)

Following **GPB** using prop-1-yn-1-ylbenzene (58.0 mg, 0.5 mmol, 1.0 equiv), the crude product was purified by column chromatography (0-5% EtOAc in hexanes) to provide the title compound as a colorless liquid in 81% yield<sup>19</sup> (99 mg).

<sup>1</sup>H NMR (400 MHz, CDCl<sub>3</sub>) δ 7.4 (m, 4H), 7.2 (m, 2H), 2.0 (d, *J* = 1.8 Hz, 3H), 1.3 (s, 12H).

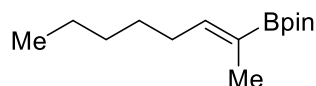

**(Z)-4,4,5,5-tetramethyl-2-(oct-2-en-3-yl)-1,3,2-dioxaborolane (7d)**

(3.7: 1 mixture of regioisomer)

Following **GPB** using oct-2-yne (55.0 mg, 0.5 mmol, 1.0 equiv), the crude product was purified by column chromatography (0-5% EtOAc in hexanes) to provide the title compound as a colorless liquid in 90% yield<sup>20</sup> (107 mg).

<sup>1</sup>H NMR (400 MHz, CDCl<sub>3</sub>) δ 6.3 (m, 1H), 2.1 (m, 2H), 1.7 (s, 3H), 1.3 (m, 6H), 1.3 (s, 12H), 0.9 (m, 3H).

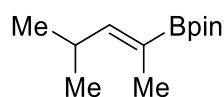

**(Z)-4,4,5,5-tetramethyl-2-(4-methylpent-2-en-3-yl)-1,3,2-dioxaborolane (7e)**

(16.6: 1 mixture of regioisomer)

Following **GPB** using 4-methylpent-2-yne (41.0 mg, 0.5 mmol, 1.0 equiv), the crude product was purified by column chromatography (0-5% EtOAc in hexanes) to provide the title compound as a colorless liquid in 60% yield<sup>21</sup> (63 mg).

<sup>1</sup>H NMR (400 MHz, CDCl<sub>3</sub>) δ 6.1 (dd, *J* = 9.1, 1.8 Hz, 1H), 2.7 (m, 1H), 1.7 (d, *J* = 1.7 Hz, 3H), 1.3 (s, 12H), 1.0 (d, *J* = 6.7 Hz, 6H).

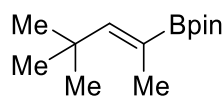

**(Z)-2-(4,4-dimethylpent-2-en-3-yl)-4,4,5,5-tetramethyl-1,3,2-dioxaborolane (7f)**

(50: 1 mixture of regioisomer)

Following **GPB** using 4,4-dimethylpent-2-yne (48.0 mg, 0.5 mmol, 1.0 equiv), the crude product was purified by column chromatography (0-5% EtOAc in hexanes) to provide the title compound as a colorless liquid in 77% yield<sup>22</sup> (86 mg).

<sup>1</sup>H NMR (400 MHz, CDCl<sub>3</sub>) δ 6.3 (s, 1H), 1.8 (s, 3H), 1.2 (s, 12H), 1.1 (s, 9H).

## Substrate Synthesis

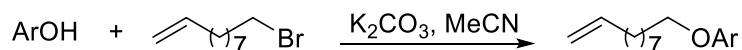

**General procedure C (GPC):** A 100 mL round-bottom flask was charged with substituted phenol (5.0 mmol, 1.0 equiv), 10-bromo-1-decene (1.3 g, 6.0 mmol, 1.2 equiv),  $\text{K}_2\text{CO}_3$  (818.0 mg, 6.0 mmol, 1.2 equiv) and acetonitrile (20.0 mL). The reaction was stirred under reflux for 12 h. After cooling to r.t., saturated  $\text{NH}_4\text{Cl}$  (aq.) was added to quench the reaction. The mixture was extracted with ethyl acetate and dried over anhydrous  $\text{Na}_2\text{SO}_4$ . The solvent was concentrated in vacuo, and the residue was purified by column chromatography to afford the pure product.

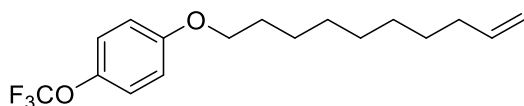

### 1-(dec-9-en-1-yloxy)-4-(trifluoromethoxy)benzene

Following GPC using 4-(trifluoromethoxy)phenol (890.0 mg, 5.0 mmol, 1.0 equiv), the crude product was purified by column chromatography (0-1% EtOAc in hexanes) to provide the title compound as a colorless liquid in 80% yield (1.26 g).

$^1\text{H NMR}$  (400 MHz,  $\text{CDCl}_3$ )  $\delta$  7.1 (d,  $J = 8.7$  Hz, 2H), 6.9 (m, 2H), 5.8 (m, 1H), 5.0 (m, 2H), 3.9 (t,  $J = 6.5$  Hz, 2H), 2.0 (m, 2H), 1.8 (m, 2H), 1.3 (m, 10H).

$^{13}\text{C NMR}$  (101 MHz,  $\text{CDCl}_3$ )  $\delta$  157.8, 142.6, 139.3, 122.5, 120.7 (q,  $J = 256.5$  Hz), 115.2, 114.3, 68.5, 34.0, 29.6, 29.5, 29.3, 29.2, 29.0, 26.1.

**IR** (neat,  $\text{cm}^{-1}$ ) 2927, 1506, 1241, 1195, 1159, 910, 838.

**HRMS (EI)** calculated for  $\text{C}_{17}\text{H}_{23}\text{F}_3\text{O}_2$   $[\text{M}]^+$   $m/z$  316.1645, found 316.1642.

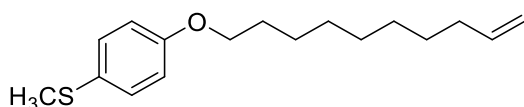

### (4-(dec-9-en-1-yloxy)phenyl)(methyl)sulfane

Following GPC using 4-(methylthio)phenol (700.0 mg, 5.0 mmol, 1.0 equiv), the crude product was purified by column chromatography (0-1% EtOAc in hexanes) to provide the title compound as a colorless liquid in 85% yield (1.17 g).

**<sup>1</sup>H NMR (400 MHz, CDCl<sub>3</sub>)** δ 7.3 (d, *J* = 8.7 Hz, 2H), 6.8 (d, *J* = 8.7 Hz, 2H), 5.8 (m, 1H), 5.0 (m, 2H), 3.9 (t, *J* = 6.6 Hz, 2H), 2.4 (s, 3H), 2.1 (m, 2H), 1.8 (m, 2H), 1.4 (m, 10H).

**<sup>13</sup>C NMR (101 MHz, CDCl<sub>3</sub>)** δ 157.8, 139.3, 130.3, 128.5, 115.3, 114.3, 68.2, 33.9, 29.5, 29.5, 29.3, 29.2, 29.0, 26.1, 18.2.

**IR (neat, cm<sup>-1</sup>)** 2923, 1595, 1493, 1297, 1241, 909, 821.

**HRMS (EI)** calculated for C<sub>17</sub>H<sub>26</sub>OS [M]<sup>+</sup> *m/z* 278.1699, found 278.1701.

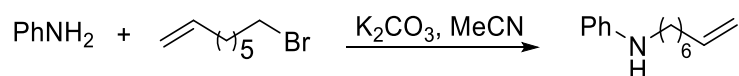

### **N-(oct-7-en-1-yl)aniline**

A 100 mL round-bottom flask was charged with aniline (465.0 mg, 5.0 mmol, 1.0 equiv), 8-bromo-1-octene (1.14 g, 6.0 mmol, 1.2 equiv), K<sub>2</sub>CO<sub>3</sub> (818.0 mg, 6.0 mmol, 1.2 equiv) and acetonitrile (20.0 mL). The reaction was stirred under reflux for 12 h. After cooling to r.t., saturated NH<sub>4</sub>Cl (aq.) was added to quench the reaction. The mixture was extracted with ethyl acetate and dried over anhydrous Na<sub>2</sub>SO<sub>4</sub>. The solvent was concentrated in vacuo and the residue was purified by column chromatography to afford the pure product as a colorless liquid in 70% yield (710.0 mg).

**<sup>1</sup>H NMR (400 MHz, CDCl<sub>3</sub>)** δ 7.2 (m, 2H), 6.7 (m, 1H), 6.6 (m, 2H), 5.8 (m, 1H), 5.0 (m, 2H), 3.6 (s, 1H), 3.1 (t, *J* = 7.1 Hz, 2H), 2.0 (m, 2H), 1.6 (m, 2H), 1.4 (m, 6H).

**<sup>13</sup>C NMR (101 MHz, CDCl<sub>3</sub>)** δ 148.6, 139.1, 129.3, 117.1, 114.4, 112.7, 44.0, 33.8, 29.6, 29.0, 28.9, 27.1.

**IR (neat, cm<sup>-1</sup>)** 2925, 1601, 1504, 1318, 1259, 908, 746.

**HRMS (ESI)** calculated for C<sub>14</sub>H<sub>22</sub>N [M+H]<sup>+</sup> *m/z* 204.1747, found 204.1744.

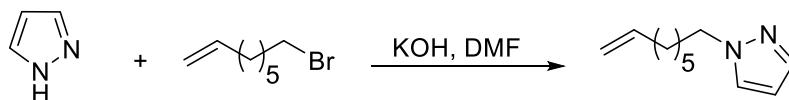

### **1-(oct-7-en-1-yl)-1H-pyrazole**

To a solution of 1H-pyrazole (340.0 mg, 5.0 mmol, 1.0 equiv) in DMF (8.0 mL), was added 8-bromo-1-octene (1.2 g, 6.0 mmol, 1.2 equiv) and KOH (336.0 mg, 6.0 mmol,

1.2 equiv). The mixture was heated to 70 °C and stirred for 3 h. The solution was allowed to cool to r.t. and water (20.0 mL) was added to the solution. Then the solution was extracted with ethyl acetate. The organic phase was washed with water and dried over Na<sub>2</sub>SO<sub>4</sub>. The solvent was concentrated in vacuo, and the residue was purified by column chromatography to afford the pure product as a yellow liquid in 90% yield (802 mg).

**<sup>1</sup>H NMR (400 MHz, CDCl<sub>3</sub>)** δ 7.5 (d, *J* = 1.8 Hz, 1H), 7.3 (d, *J* = 2.2 Hz, 1H), 6.2 (t, *J* = 2.0 Hz, 1H), 5.7 (m, 1H), 4.9 (m, 2H), 4.1 (t, *J* = 7.2 Hz, 2H), 2.0 (m, 2H), 1.8 (m, 2H), 1.3 (m, 6H).

**<sup>13</sup>C NMR (101 MHz, CDCl<sub>3</sub>)** δ 139.0, 138.8, 128.7, 114.3, 105.1, 52.0, 33.6, 30.4, 28.6, 28.5, 26.4.

**IR (neat, cm<sup>-1</sup>)** 2729, 1604, 1512, 1395, 1090, 910, 746.

**HRMS (ESI)** calculated for C<sub>11</sub>H<sub>19</sub>N<sub>2</sub> [M+H]<sup>+</sup> *m/z* 179.1543, found 179.1542.

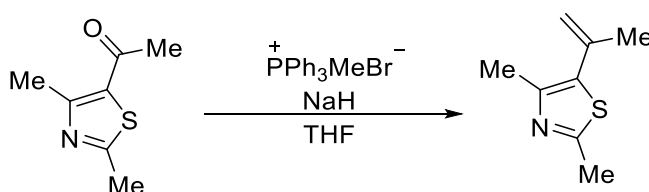

### 2,4-dimethyl-5-(prop-1-en-2-yl)thiazole

A solution of methyl triphenylphosphoniumbromide (2.2 g, 6.0 mmol, 1.2 equiv) in anhydrous THF (10.0 mL) was cooled to 0 °C under argon, followed by addition of <sup>n</sup>BuLi (2.5 M in hexane, 2.4 mL, 6.0 mmol, 1.2 equiv). The reaction mixture was stirred at 0 °C for 1 h, and then a solution of 1-(2,4-dimethylthiazol-5-yl)ethan-1-one (776.0 mg, 5.0 mmol, 1.0 equiv) in anhydrous THF (4.0 mL) was added dropwise. The resulting mixture was warmed to r.t. and kept stirring for 12 h. reaction mixture was concentrated under reduced pressure to yield a residue which was further purified over silica gel flash column chromatography to afford the product as a yellow liquid in 80% yield (613 mg).

**<sup>1</sup>H NMR (400 MHz, CDCl<sub>3</sub>)** δ 5.1 (s, 1H), 5.0 (s, 1H), 2.6 (s, 3H), 2.4 (s, 3H), 2.0 (t, *J* = 1.2 Hz, 3H).

**<sup>13</sup>C NMR (101 MHz, CDCl<sub>3</sub>)** δ 162.1, 147.2, 135.8, 133.1, 115.9, 25.1, 19.0, 16.8.

**IR (neat, cm<sup>-1</sup>)** 1608, 1531, 1438, 1375, 1182, 889.

**HRMS (ESI)** calculated for C<sub>8</sub>H<sub>12</sub>NS [M+H]<sup>+</sup> *m/z* 154.0685, found 154.0684.



## Gram-Scale Reaction and Transformation of Product

### Procedure for gram-scale reaction

In a nitrogen-purged Schlenk tube containing a magnetic stirring bar, toluene (5.0 mL, 1.0 M), HBpin (870  $\mu$ L, 6.0 mmol, 1.2 equiv) and <sup>n</sup>BuLi (2.5 M in hexane, 100  $\mu$ L, 0.025 mmol, 5 mol %) were added sequentially. Then the mixture was stirred for 5 min at room temperature. The 4-phenyl-1-butene (751.1  $\mu$ L, 5.0 mmol) was then added dropwise, and the reaction mixture was stirred at 110 °C for 18 h. After completion of the reaction, the reaction mixture was allowed to cool to r.t. and quenched by HCl (1.0 M in EtOAc). Then the reaction mixture was directly filtered through a short pad of silica gel, eluting with EtOAc. The solvent was removed in vacuo. The linear/branched ratios of crude product mixtures were determined at this stage by GC-MS analysis. The product was purified by chromatography on silica gel as a colorless liquid in 89% yield (1.15 g).

### Transformation of 3a

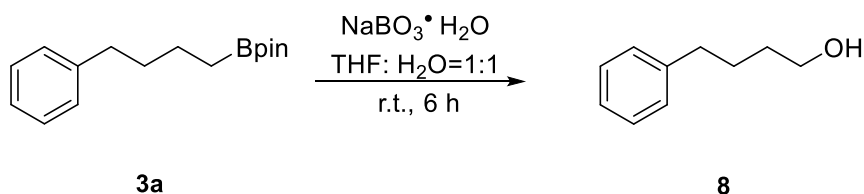

To a solution of **3a** (52.0 mg, 0.2 mmol, 1.0 equiv) in THF: H<sub>2</sub>O (2.0 mL, 1:1(v/v)) was added sodium perborate (59.9 mg, 0.6 mmol, 3.0 equiv). The reaction mixture was stirred for 6 h at room temperature. The reaction was quenched with water and extracted with ethyl acetate. The combined organic layers were dried over Na<sub>2</sub>SO<sub>4</sub> and concentrated in vacuo. The residue was purified by silica gel chromatography to get the product in 95% yield<sup>23</sup> (28 mg).

<sup>1</sup>H NMR (400 MHz, CDCl<sub>3</sub>)  $\delta$  7.3 (m, 2H), 7.2 (m, 3H), 3.6 (t,  $J$  = 6.4 Hz, 2H), 2.6 (t,  $J$  = 7.5 Hz, 2H), 1.7 (m, 2H), 1.6 (m, 2H).

<sup>13</sup>C NMR (101 MHz, CDCl<sub>3</sub>)  $\delta$  142.4, 128.5, 128.4, 125.9, 62.9, 35.7, 32.4, 27.7.

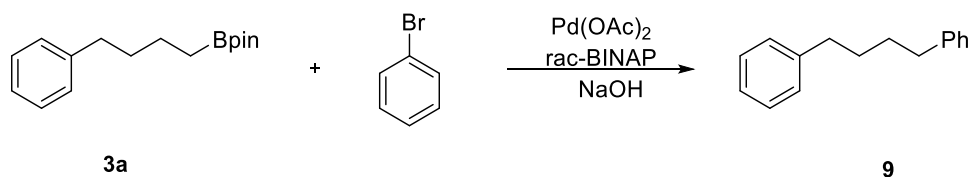

To a nitrogen-purged Schlenk tube containing a magnetic stirring bar, Pd(OAc)<sub>2</sub> (4.5 mg, 0.02 mmol, 0.1 equiv), *rac*-BINAP (14.9 mg, 0.024 mmol, 0.12 equiv) and NaOH (120.0 mg, 3.0 mmol, 15.0 equiv) and THF (1.0 mL) were added. The reaction mixture was stirred at r.t. for 30 min. **3a** (52.0 mg, 0.2 mmol, 1.0 equiv), bromobenzene (47.1 mg, 0.3 mmol, 1.5 equiv) and H<sub>2</sub>O (0.2 mL) were then added. The reaction mixture was stirred for 16 h at 100 °C. Then the mixture was quenched with water and extracted with ethyl acetate. The solvent was concentrated in vacuo. The residue was purified by silica gel chromatography to give the product in 55% yield<sup>24</sup> (23 mg).

<sup>1</sup>H NMR (400 MHz, CDCl<sub>3</sub>) δ 7.3 (m, 4H), 7.2 (m, 6H), 2.6 (m, 4H), 1.7 (m, 4H).

<sup>13</sup>C NMR (101 MHz, CDCl<sub>3</sub>) δ 142.7, 128.5, 128.4, 125.8, 35.9, 31.2.

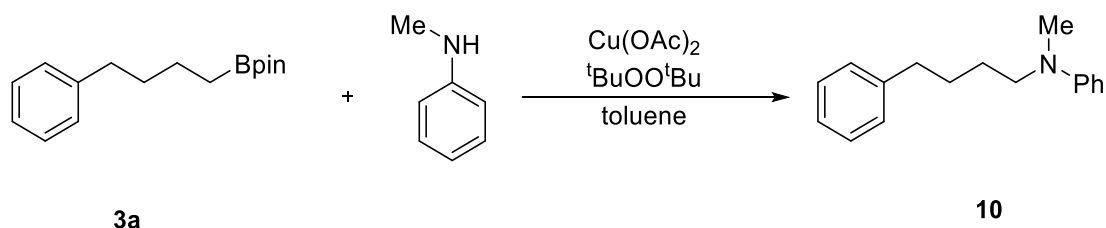

In a nitrogen-purged Schlenk tube containing a magnetic stirring bar, **3a** (52.0 mg, 0.2 mmol, 1.0 equiv), N-methylaniline (32.1 mg, 0.3 mmol, 1.5 equiv), Cu(OAc)<sub>2</sub> (1.8 mg, 0.01 mmol, 5.0 mol%), toluene (1.0 ml) and tBuOOtBu (58.5 mg, 0.4 mmol, 2.0 equiv) were added. The reaction mixture was allowed to stir at 80 °C for 48 h, after cooling to r.t., saturated Na<sub>2</sub>S<sub>2</sub>O<sub>3</sub> solution was added. The mixture was extracted with ethyl acetate twice, dried over Na<sub>2</sub>SO<sub>4</sub> and concentrate. The residue was purified by column chromatography on silica gel to afford the product in 60% yield<sup>25</sup> (28.7 mg).

<sup>1</sup>H NMR (400 MHz, CDCl<sub>3</sub>) δ 7.3 (m, 3H), 7.2 (m, 4H), 6.7 (m, 3H), 3.3 (t, *J* = 6.8 Hz, 2H), 2.9 (s, 3H), 2.6 (t, *J* = 7.0 Hz, 2H), 1.6 (m, 4H).

<sup>13</sup>C NMR (101 MHz, CDCl<sub>3</sub>) δ 149.5, 142.5, 129.3, 128.5, 128.5, 125.9, 116.0, 112.2, 52.8, 38.5, 36.0, 29.2, 26.6.

### Mechanistic Studies

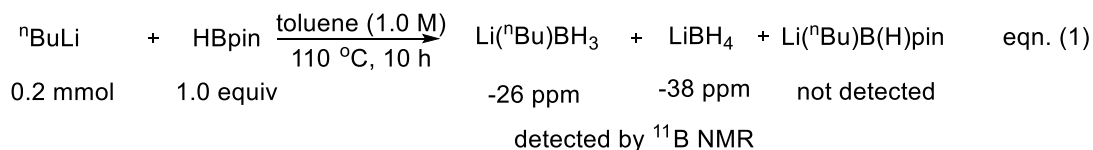

In a nitrogen-purged Schlenk tube containing a magnetic stirring bar, toluene (0.2 mL, 1.0 M), HBpin (29.0  $\mu\text{L}$ , 0.2 mmol, 1.0 equiv) and  ${}^n\text{BuLi}$  (2.5 M in hexane, 80.0  $\mu\text{L}$ , 0.2 mmol, 1.0 equiv) were added sequentially. Then the reaction mixture was stirred at 110  $^\circ\text{C}$  for 10 h. After cooling to room temperature, the crude reaction mixture was used for  ${}^{11}\text{B}$  NMR analysis.

$\text{Li}({}^n\text{Bu})\text{BH}_3$  (-26 ppm) and  $\text{LiBH}_4$  (-38 ppm) were detected by  ${}^{11}\text{B}$  NMR analysis.

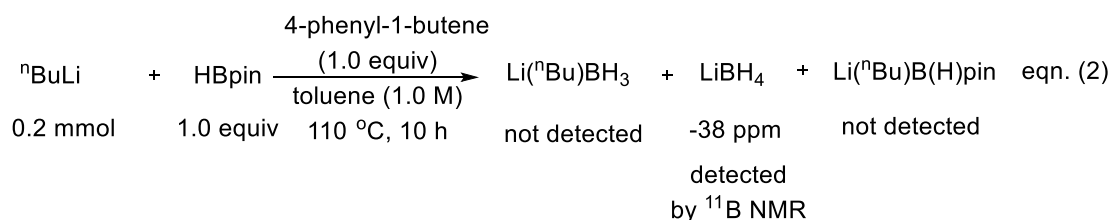

In a nitrogen-purged Schlenk tube containing a magnetic stirring bar, toluene (0.2 mL, 1.0 M), HBpin (29.0  $\mu\text{L}$ , 0.2 mmol, 1.0 equiv),  ${}^n\text{BuLi}$  (2.5 M in hexane, 80.0  $\mu\text{L}$ , 0.2 mmol, 1.0 equiv) and 4-phenyl-1-butene (30.0  $\mu\text{L}$ , 0.2 mmol, 1.0 equiv) were added sequentially. Then the reaction mixture was stirred at 110  $^\circ\text{C}$  for 10 h. After cooling to room temperature, the crude reaction mixture was used for  ${}^{11}\text{B}$  NMR analysis.

We observed that the peak for  $\text{LiBH}_4$  by  ${}^{11}\text{B}$  NMR analysis, but the peak for  $\text{Li}({}^n\text{Bu})\text{BH}_3$  was not detected. Since  $\text{LiBH}_4$  is less reactive towards 1-alkene as reported in the literature (Tetrahedron Lett. 2003, 44, 8077), we prefer that  $\text{Li}({}^n\text{Bu})\text{BH}_3$  to be the active species but not exclude the possibility of other boron-hydride species. The role of  ${}^n\text{BuLi}$  supposed to activate HBpin to form a mixture of boron-hydride species as real catalysts. Based on these findings, we proposed a possible mechanism, as shown below.

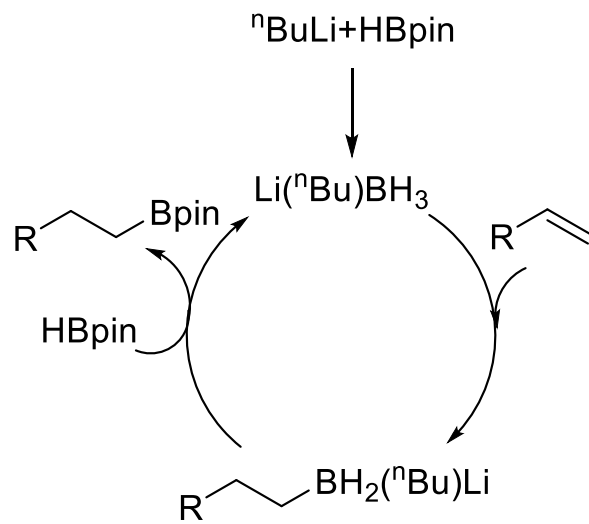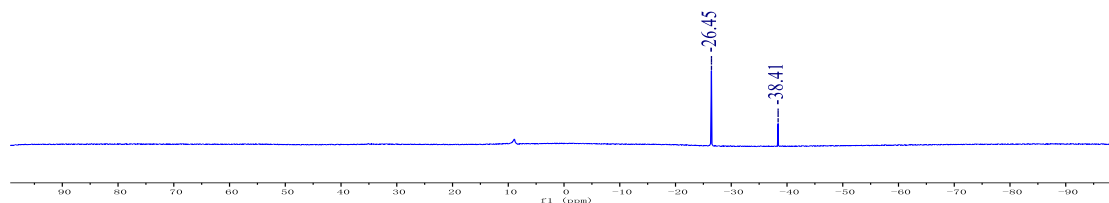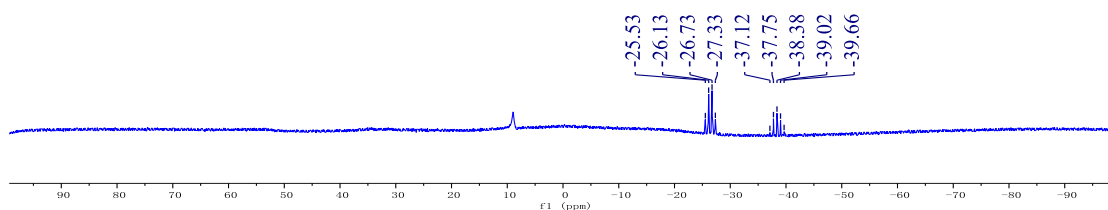

## References

1. M. D. Greenhalgh and S. P. Thomas, *Chem. Commun.*, 2013, **49**, 11230.
2. Q. Yin, S. Kemper, H. F. T. Klare and M. Oestreich, *Chem. Eur. J.*, 2016, **22**, 13840.
3. A. Joshi-Pangu, X. Ma, M. Diane, S. Iqbal, R. J. Kribs, R. Huang, C. Wang, and M. Biscoe, *J. Org. Chem.*, 2012, **77**, 6629.
4. Y. Cheng, C. Mück-Lichtenfeld and A. Studer, *Angew. Chem. Int. Ed.*, 2018, **57**, 16832.
5. J. M. Jégo, B. Carboni and M. Vaultier, *Bulletin de la Societe Chimique de France*, 1992, **129**, 554.
6. L. Zhang, D. Peng, X. Leng and Z. Huang, *Angew. Chem. Int. Ed.*, 2013, **52**, 3676.
7. J. V. Obligation and P. J. Chirik, *Org. Lett.*, 2013, **15**, 2680.
8. B. Chen, P. Cao, Y. Liao, M. Wang and J. Liao, *Org. Lett.*, 2018, **20**, 1346.
9. Y. Wen, J. Xie,; C. Deng and C. Li, *J. Org. Chem.*, 2015, **80**, 4142.
10. M. Clement and G. David, *Chem. Commun.*, 2011, **47**, 298.
11. Y. Liu, Y. Zhou, H. Wang and J. Qu, *RSC Adv.*, 2015, **5**, 73705.
12. K. Yang and Q. Song, *Green. Chem.*, 2016, **18**, 932.
13. Di Wang, Xue, K. N. Houk and Z. Shi, *Angew. Chem. Int. Ed.*, 2018, **57**, 16861.
14. R. Corberan, N. W. Mszar and A. H. Hoveyda, *Angew. Chem. Int. Ed.*, 2011, **50**, 7079.
15. R. Corberan, N. W. Mszar and A. H. Hoveyda, *Angew. Chem. Int. Ed.*, 2011, **50**, 7079.
16. J. Myhill, L. Zhang, G. Lovinger and J. P. Morken, *Angew. Chem. Int. Ed.*, 2018, **57**, 12799.
17. B. Alessandro, T. Stephen P and C. Michael, *Angew. Chem. Int. Ed.*, 2016, **55**, 15356.
18. M. Souvik, V. P. Kumar and Geetharani, *Chem. Commun.*, 2018, **54**, 13690.
19. F. Meng, B. Jung, F. Haeffner, A. Hoveyda, *Org. Lett.*, 2013, **6**, 1414.
20. K. Srinivas, C. Babu and G. Prabusankar, *Dalton Trans.*, 2015, **44**, 15636
21. W. Guan, A. Michael, M. McIntosh, L. Koren-Selfridge, J. Scott, T. Clark, *J. Org. Chem.* 2014, **79**, 7199
22. O. Ken; M. Shigeru; G. Ryosuke; I. Masayuki, *Angew. Chem. Int. Ed.*, 2010, **49**, 329
23. S. Michal, S. Malcolm, E. J. Andrew and P. J. David, *J. Am. Chem. Soc.*, 2014, **136**, 2268.
24. M. Prinsell, D. Everson and D. Weix, *Chem. Commun.*, 2010, **46**, 5743.
25. J. Chen; J. Lin and J. Xiao, *Chem. Commun.*, 2018, **54**, 7034.

# NMR Spectra

3a

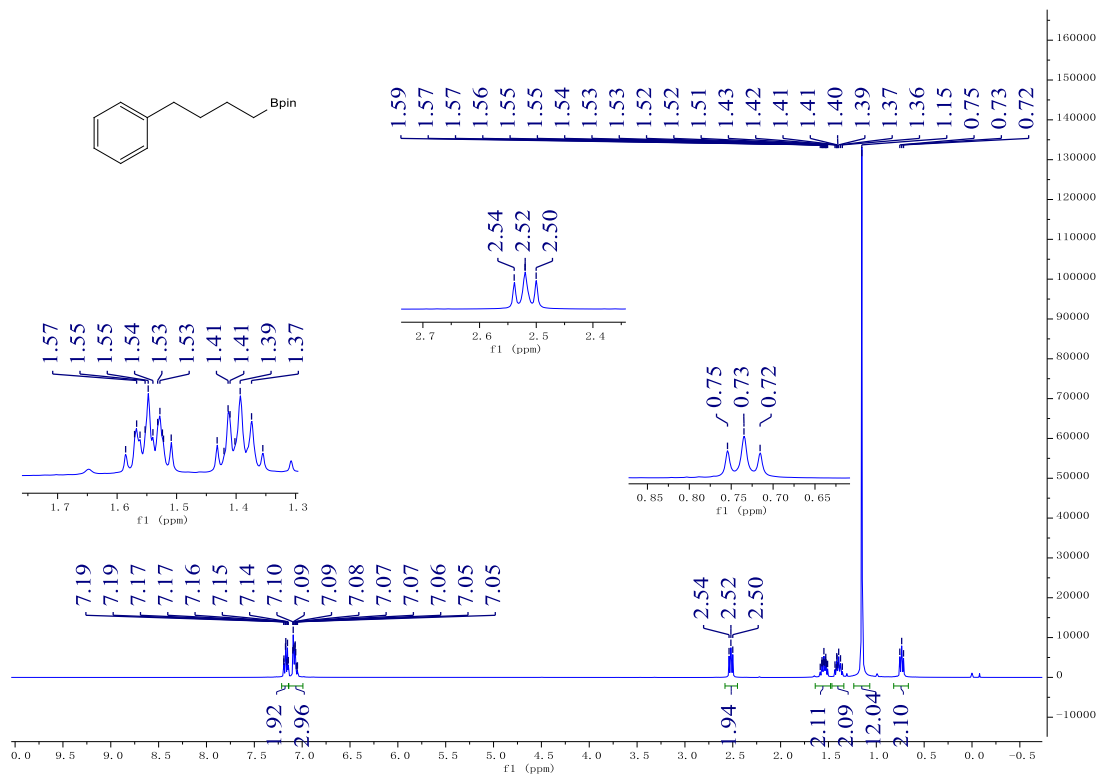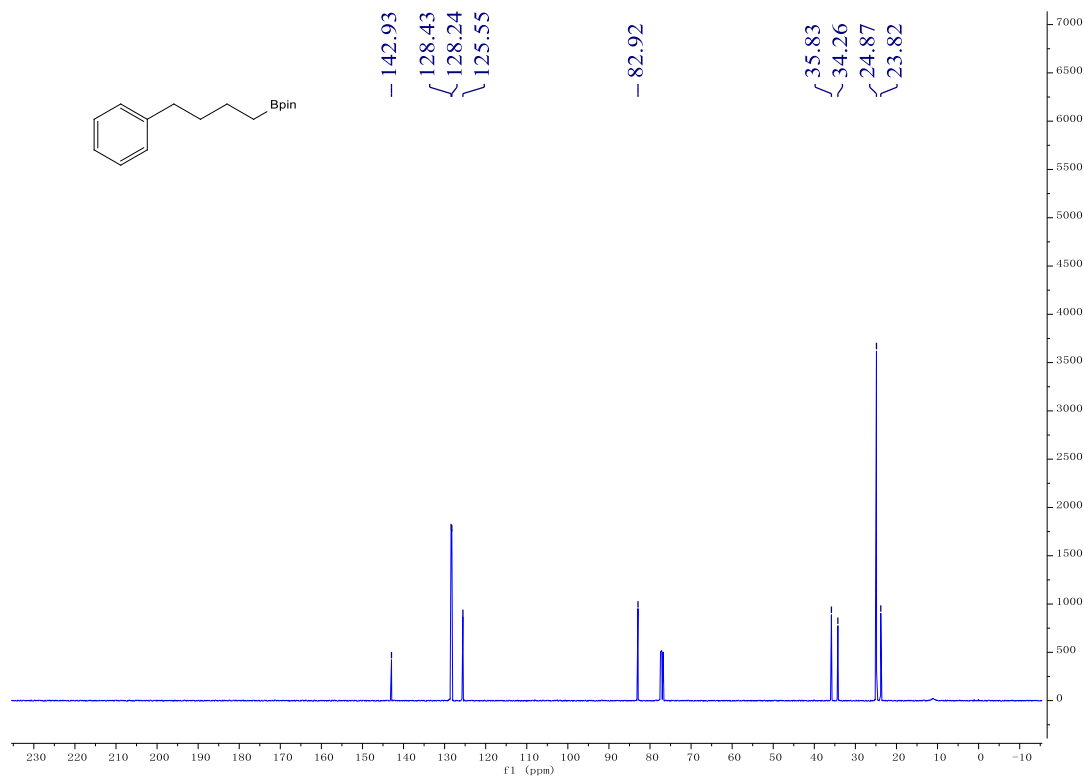

3b

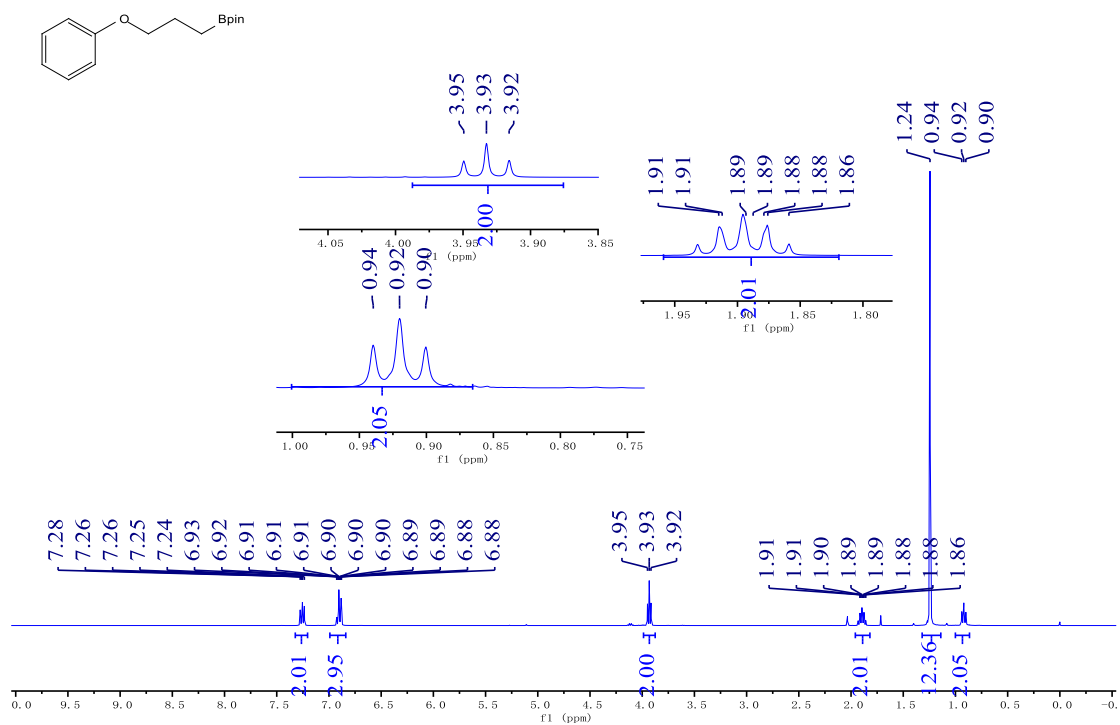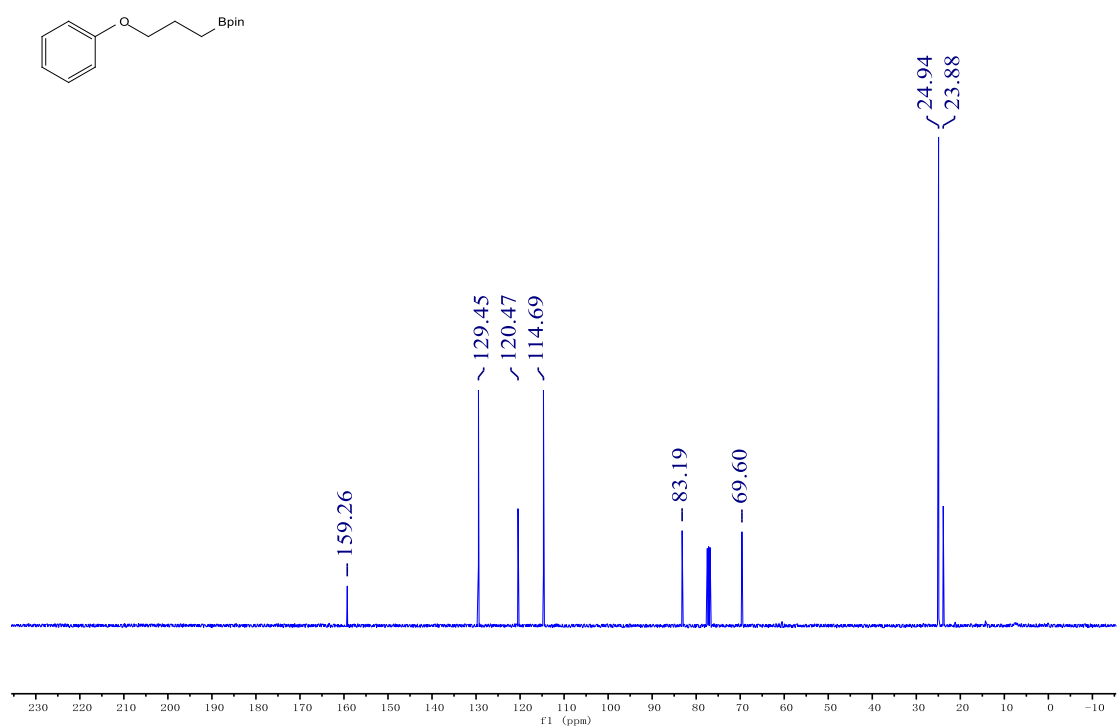

3c

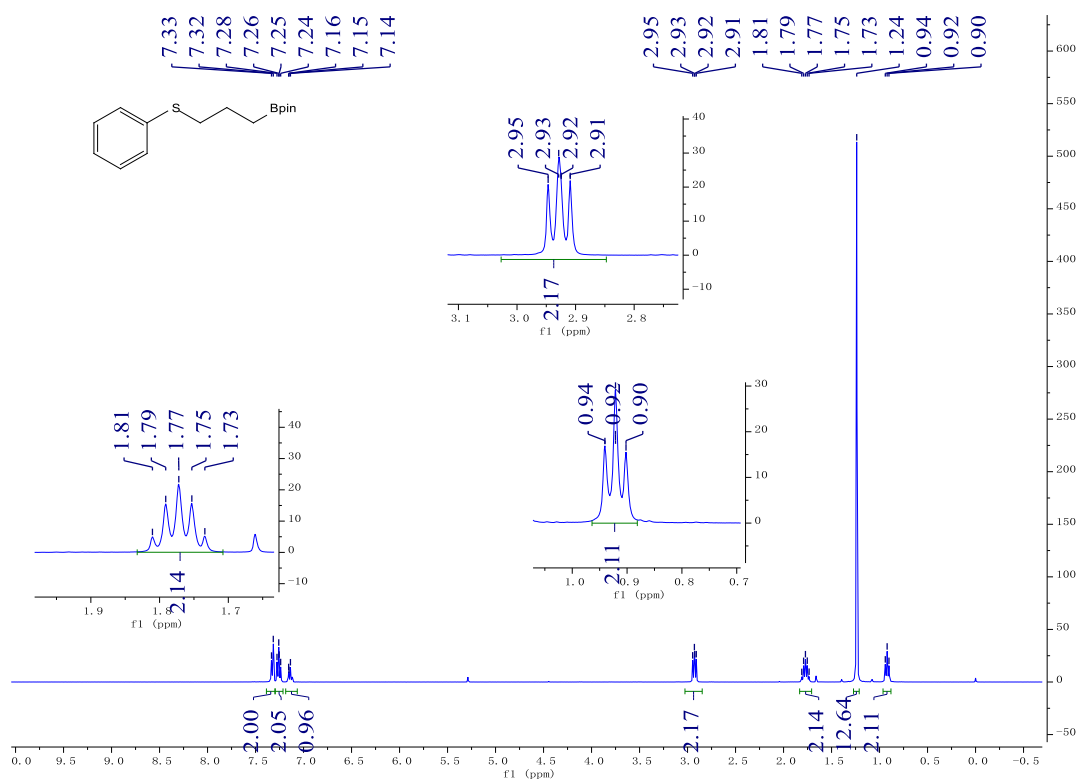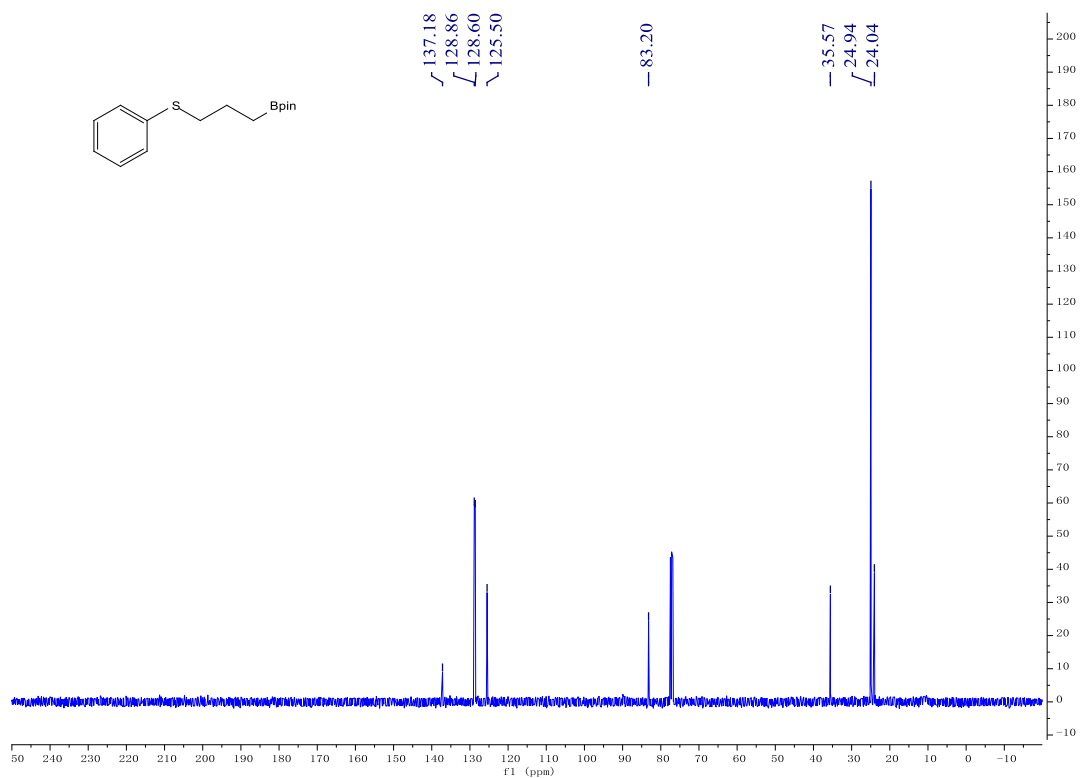



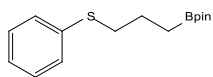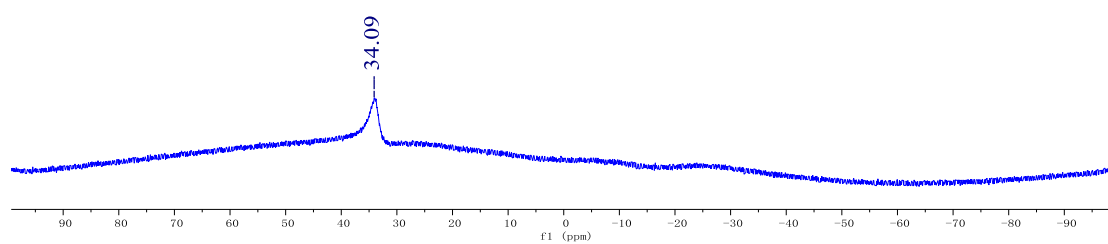

3d

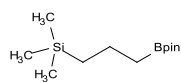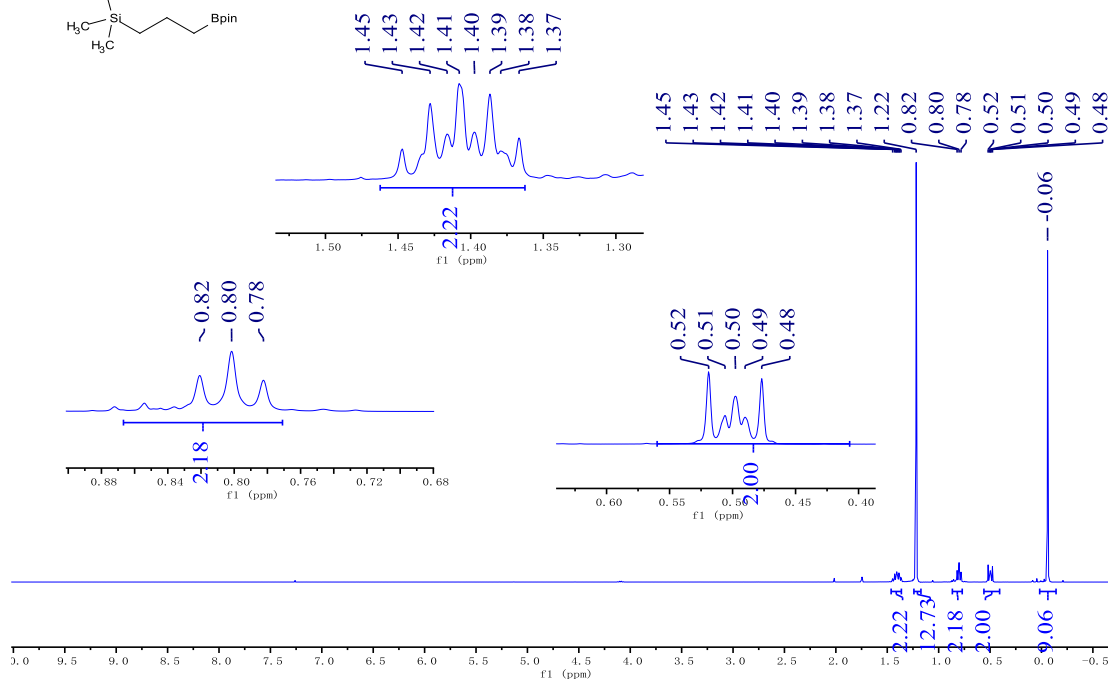

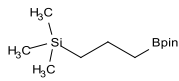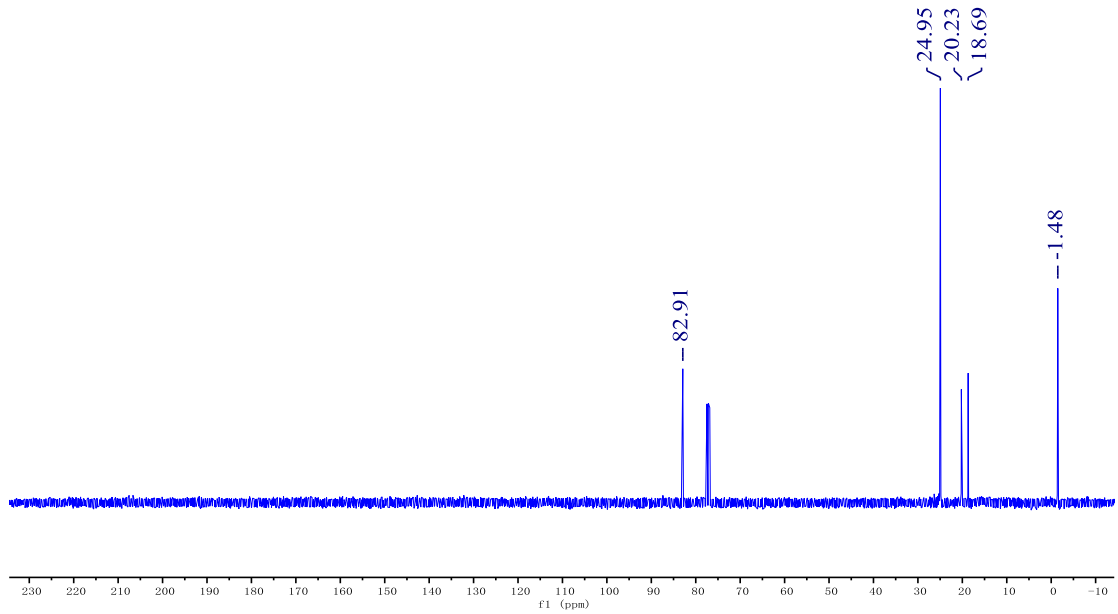

3e

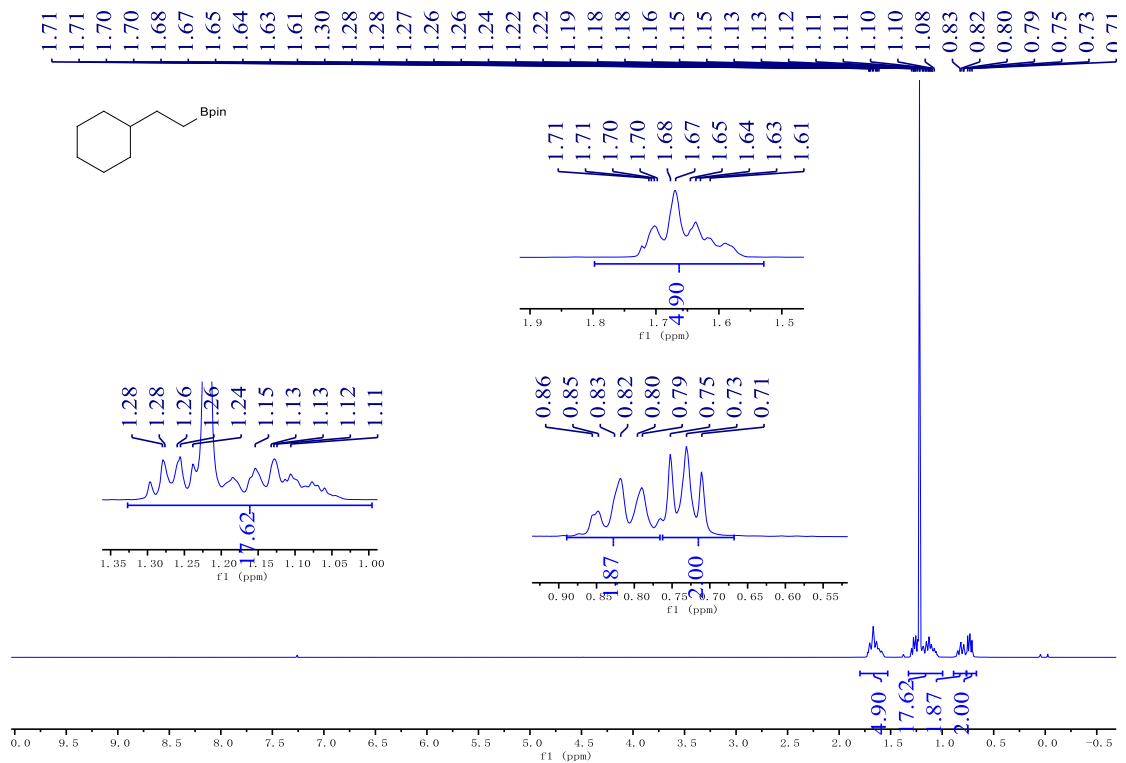

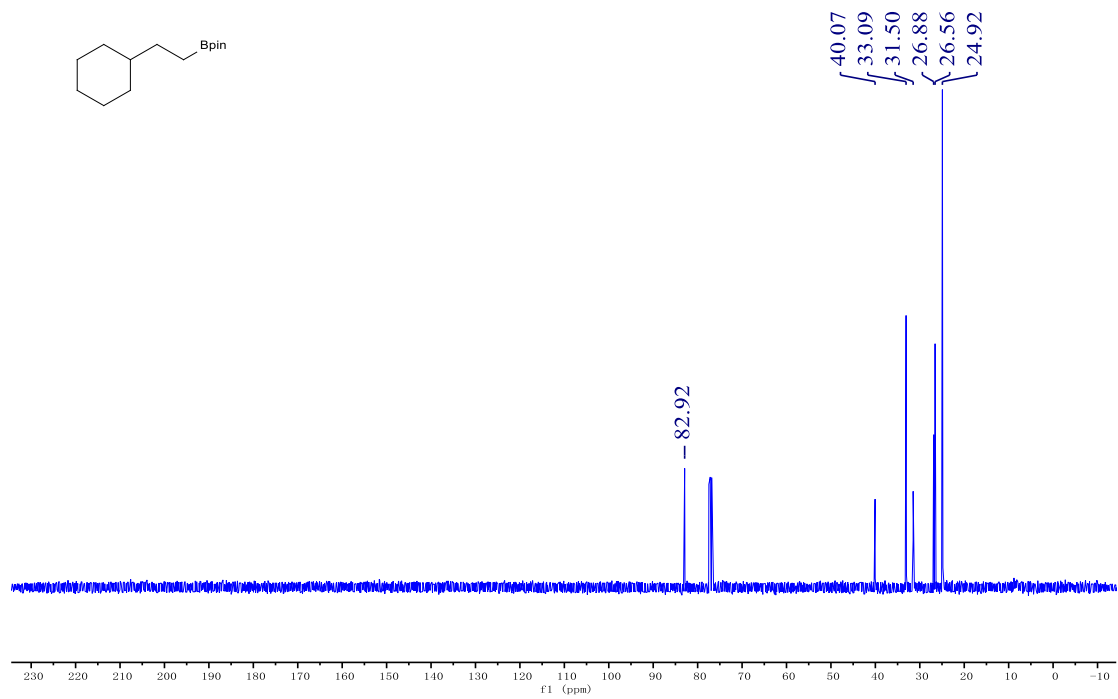

3f

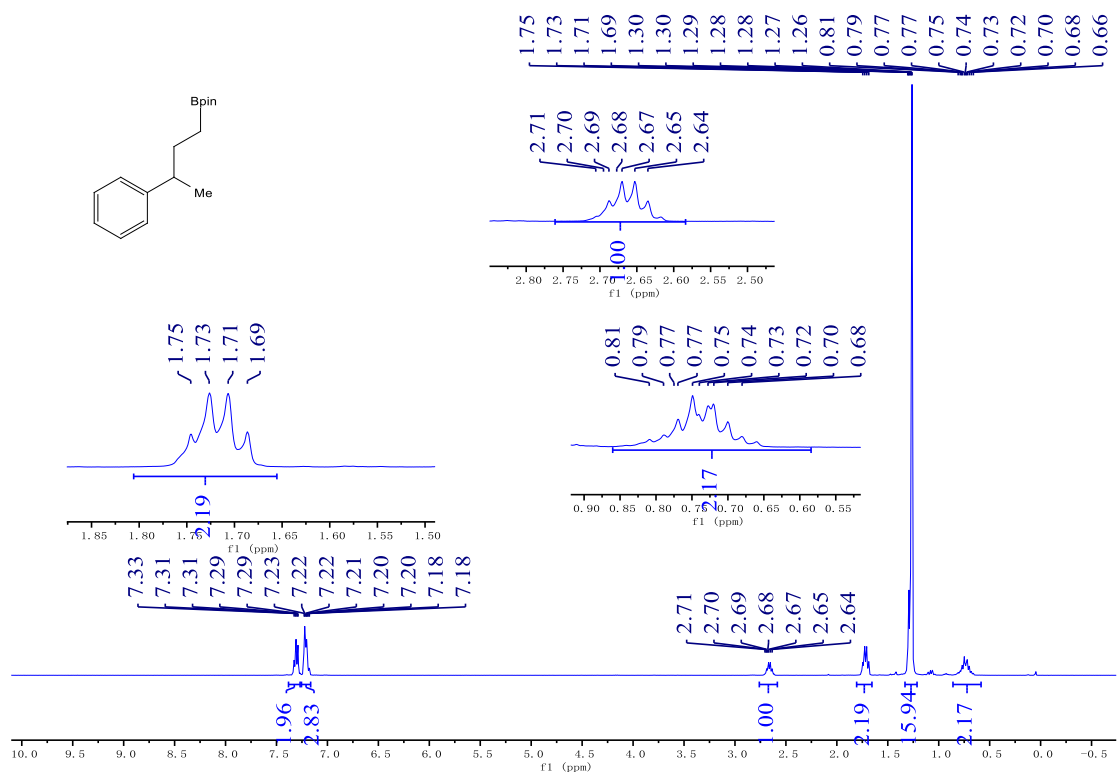

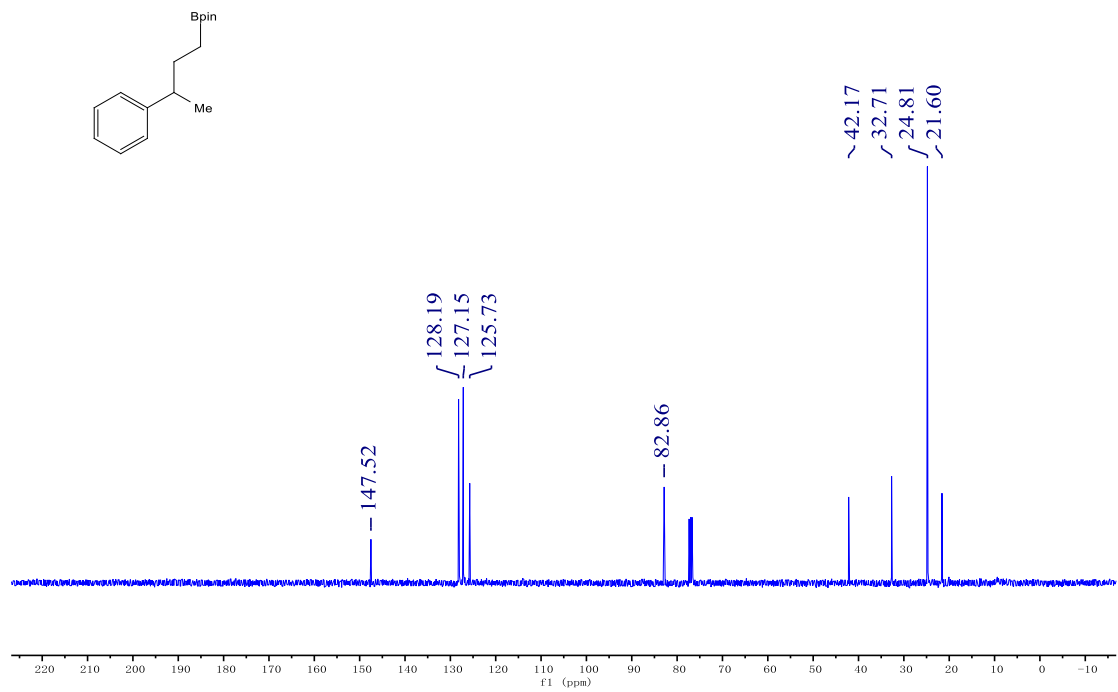

3g

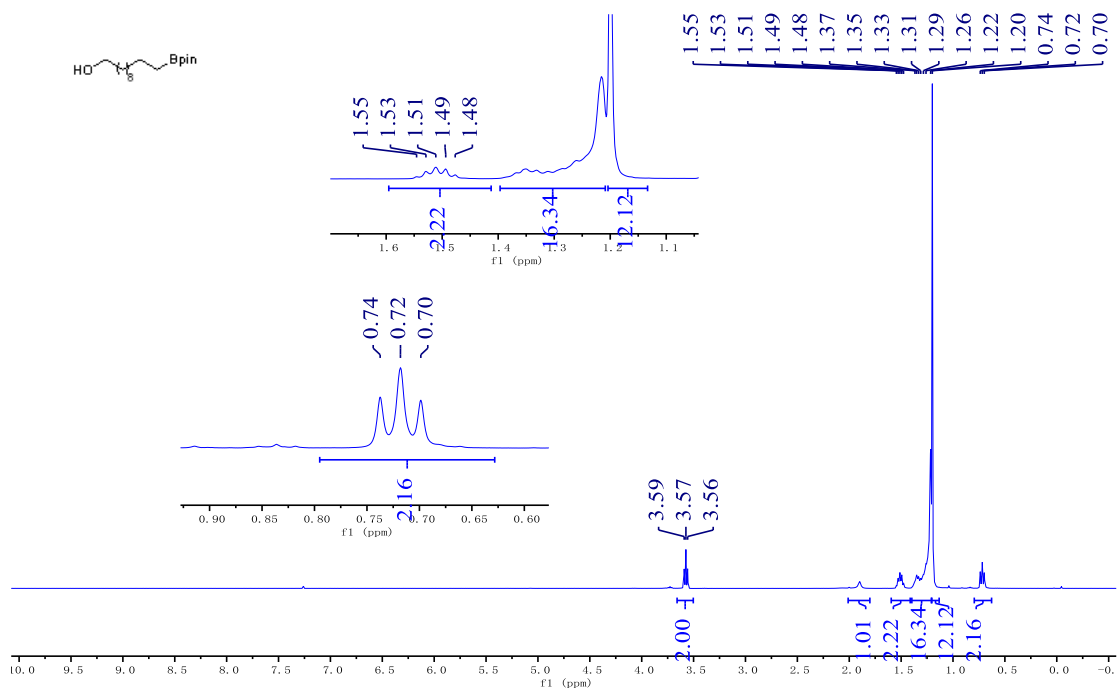

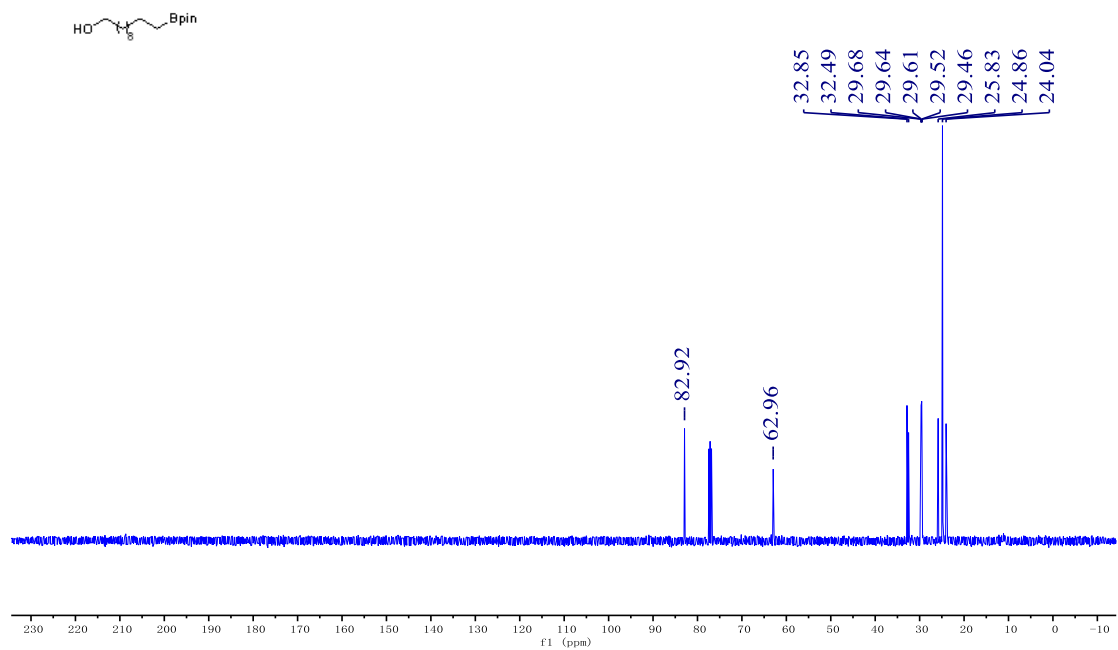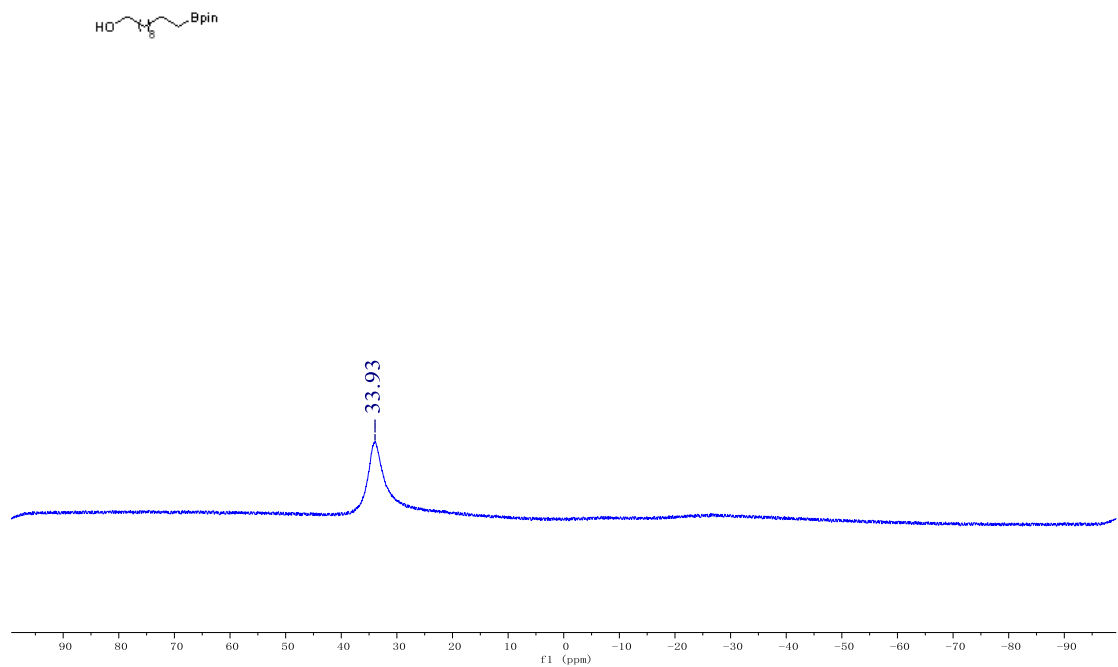

**3h**

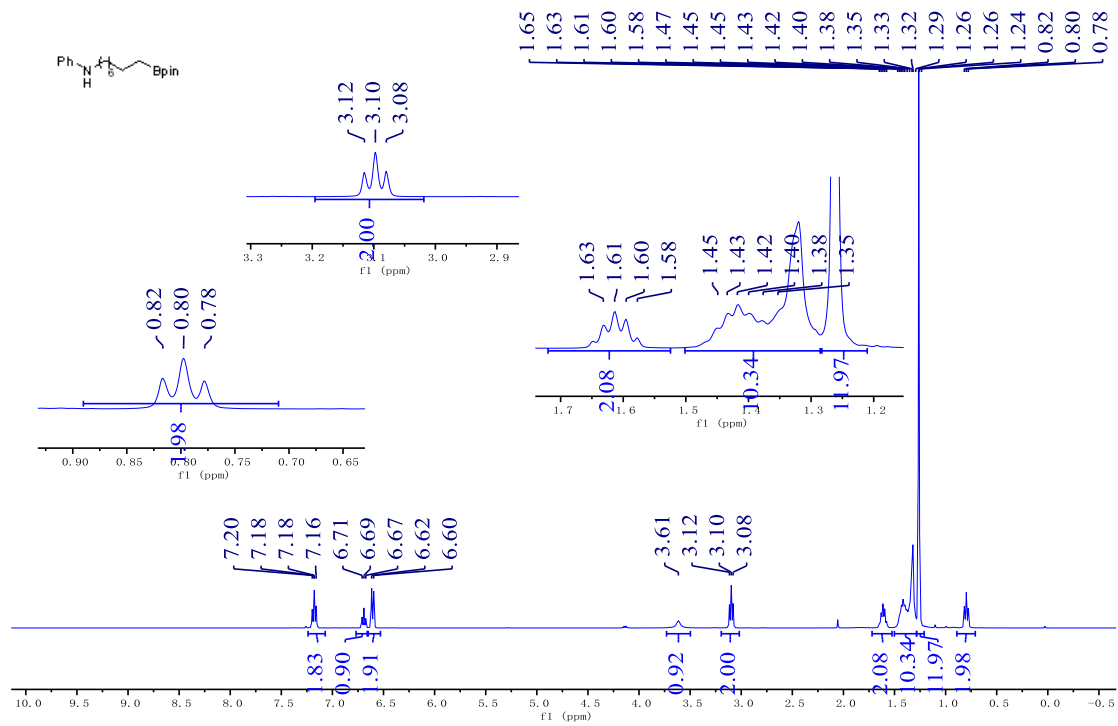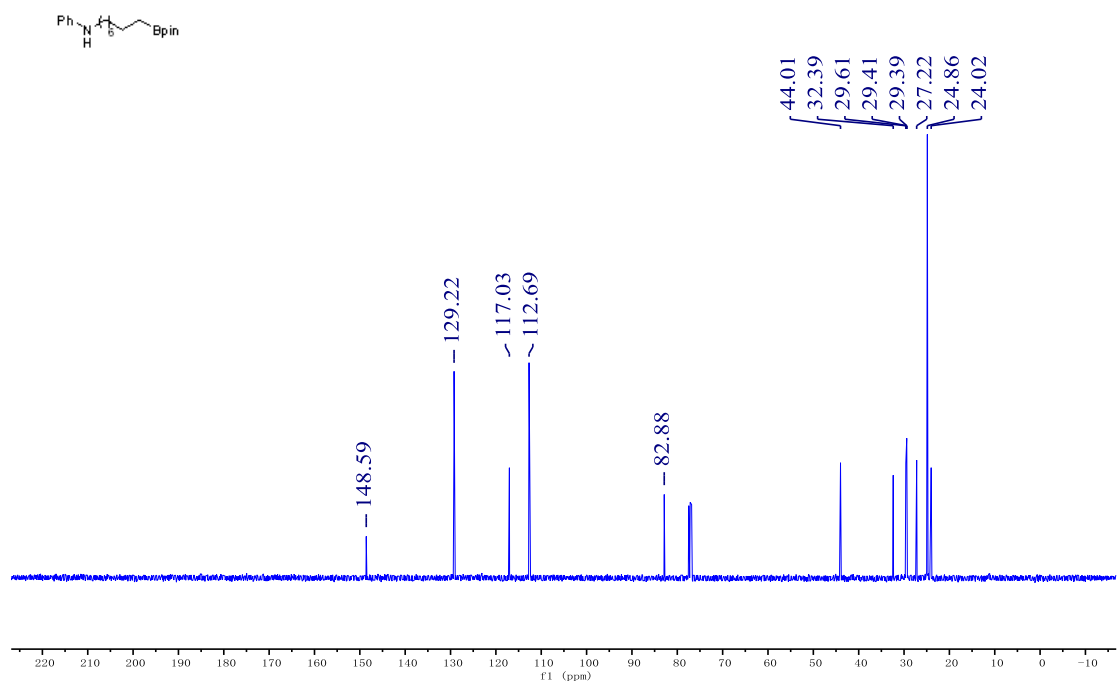

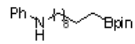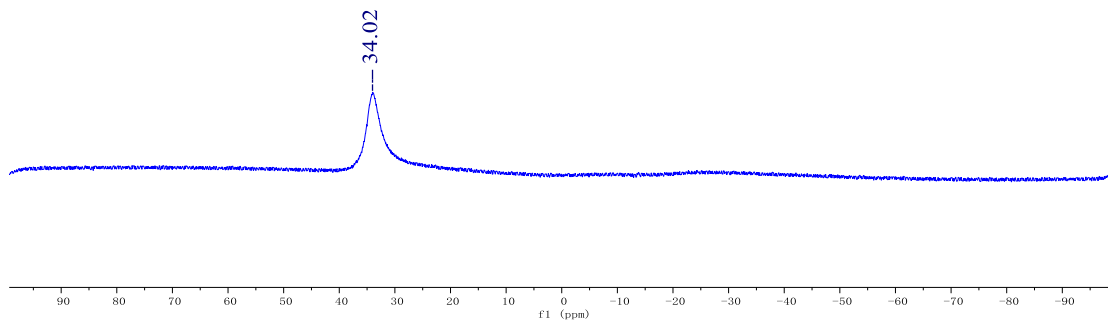

3i

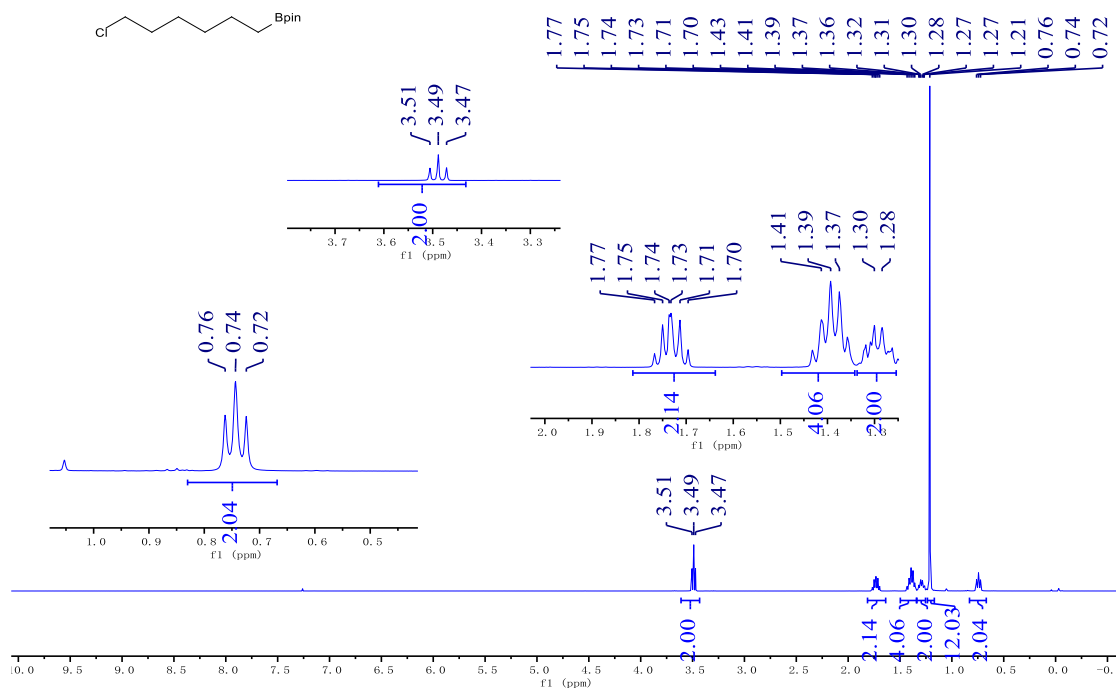

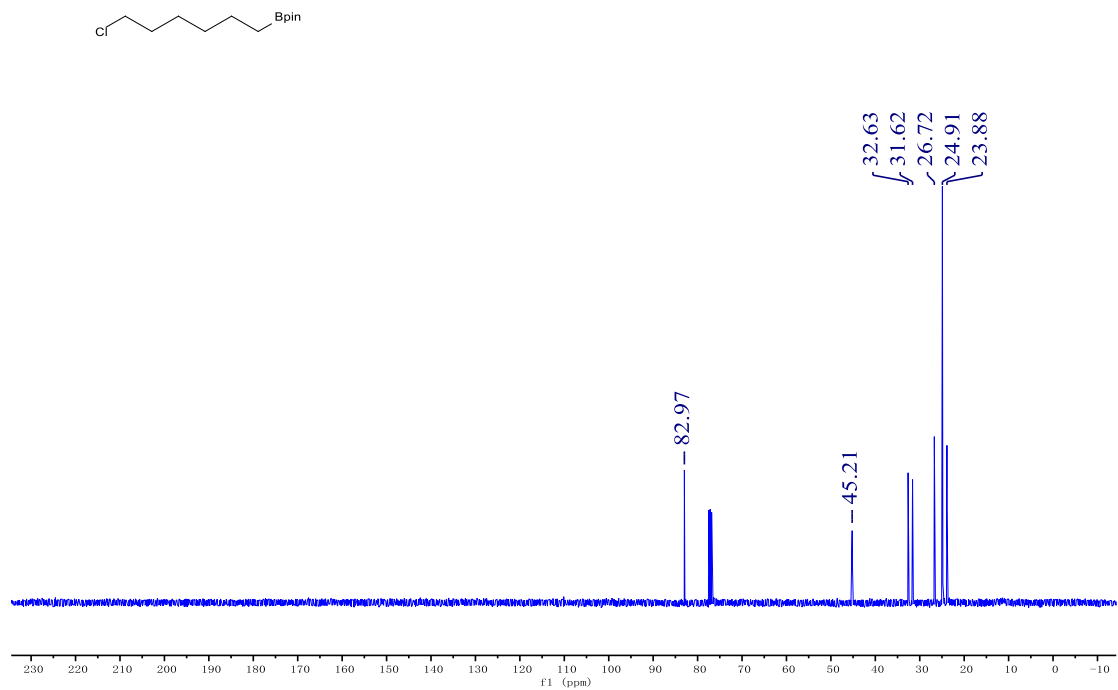

3j

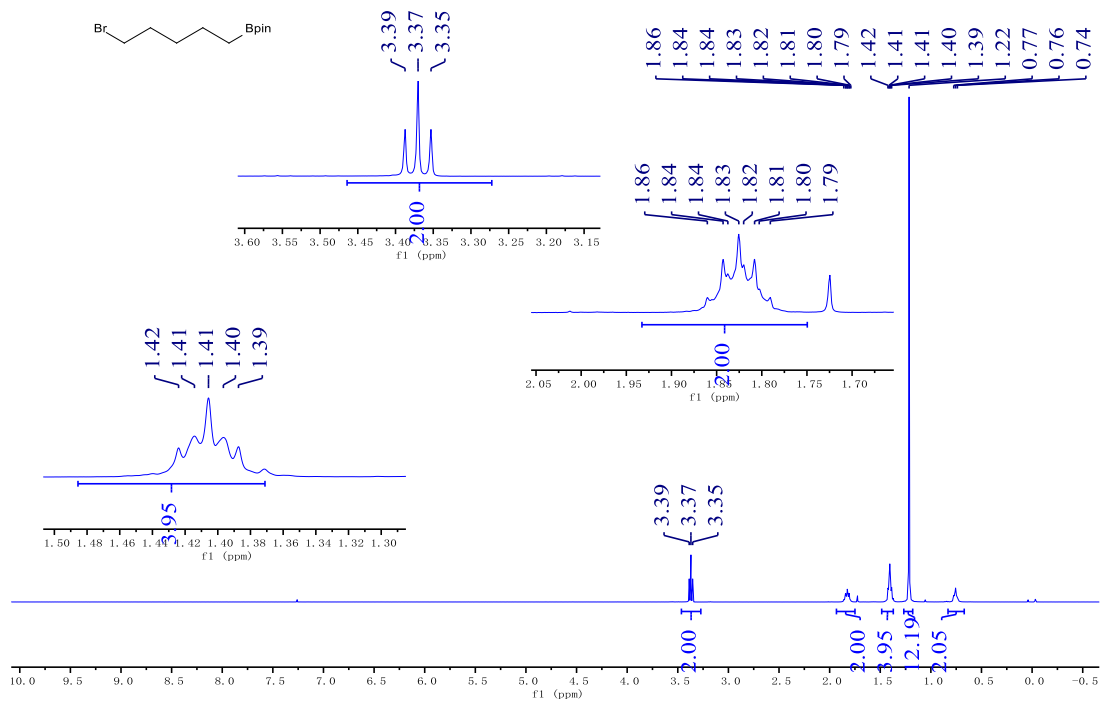



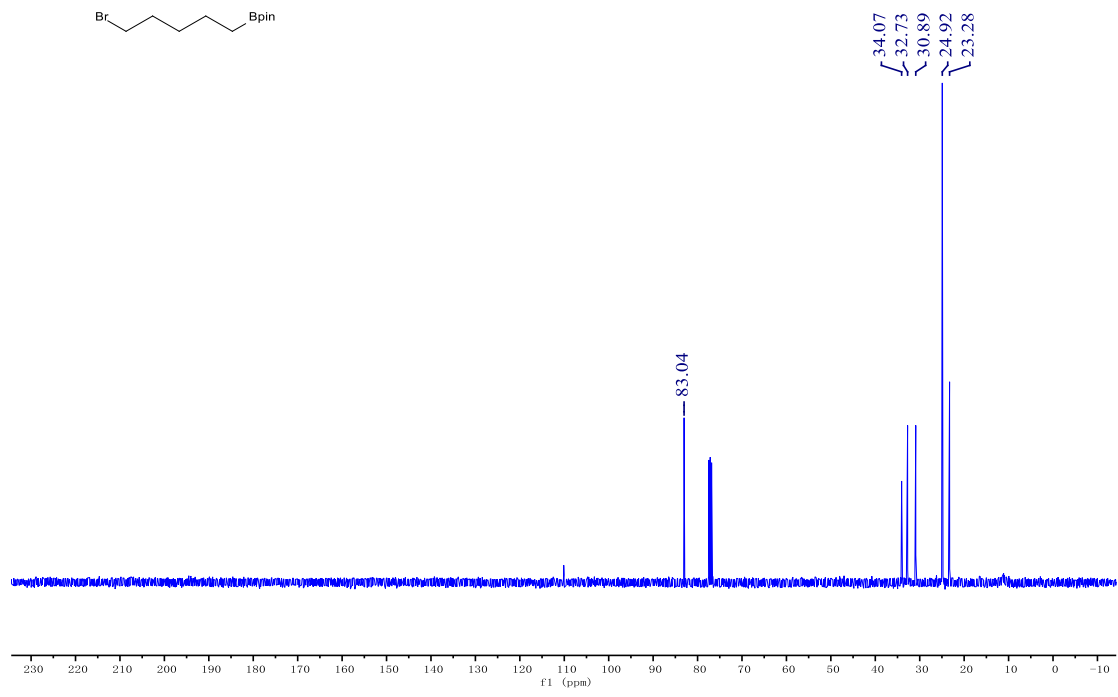

3k

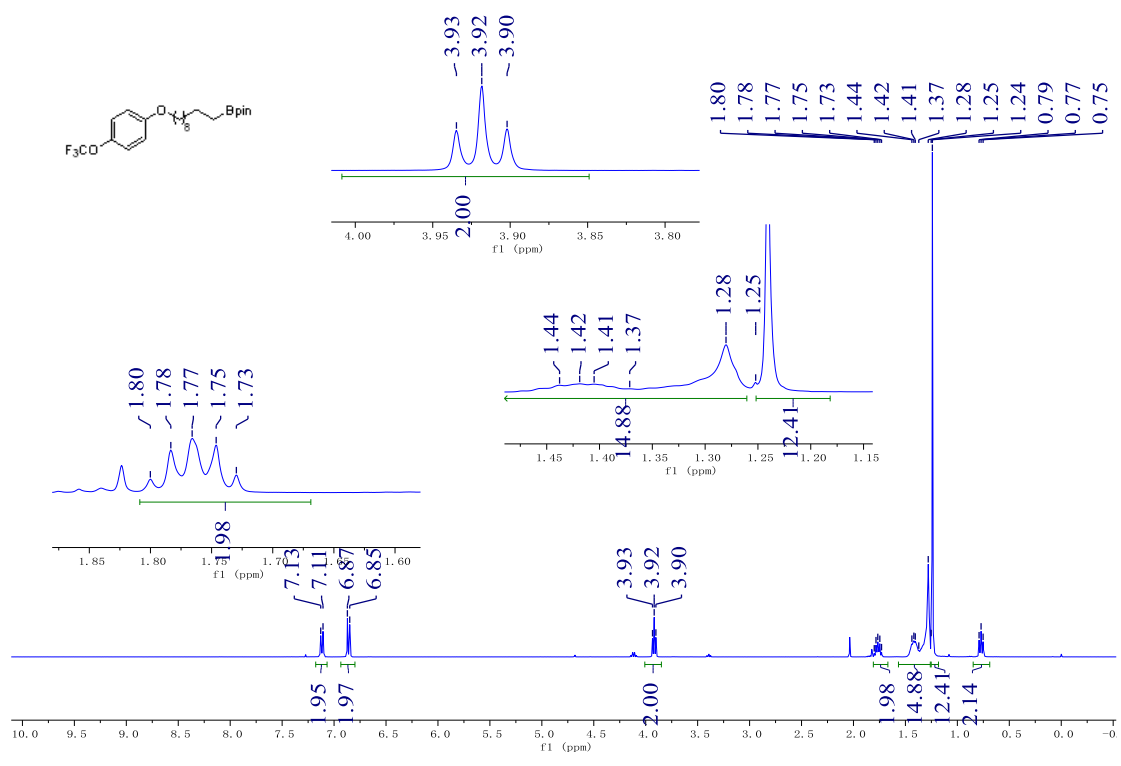

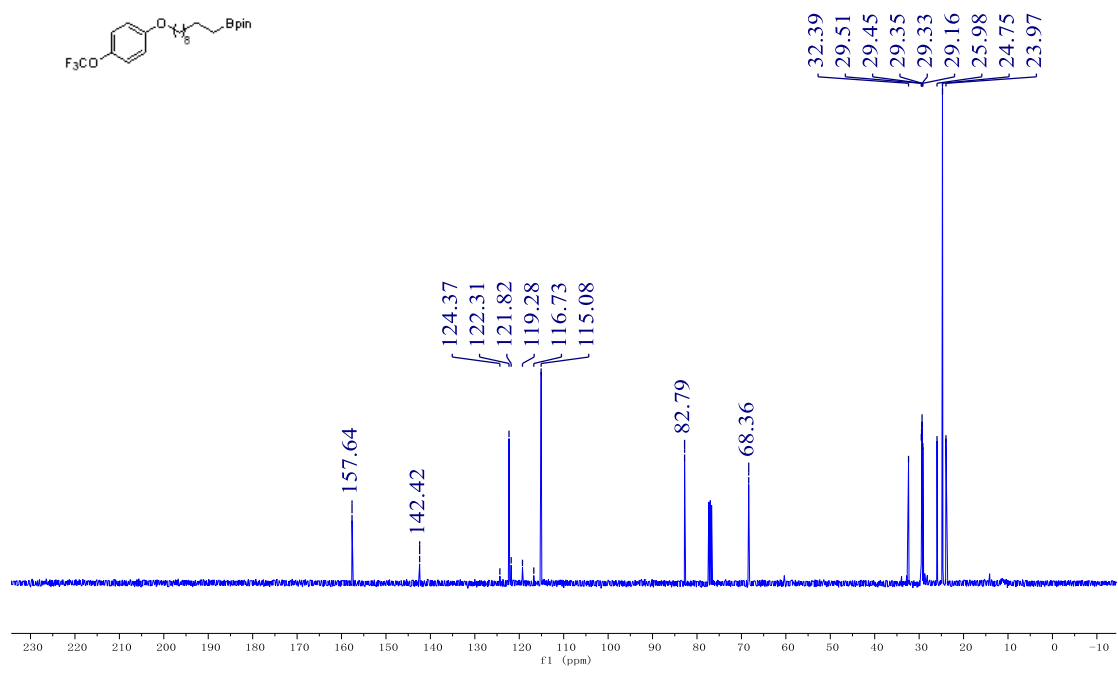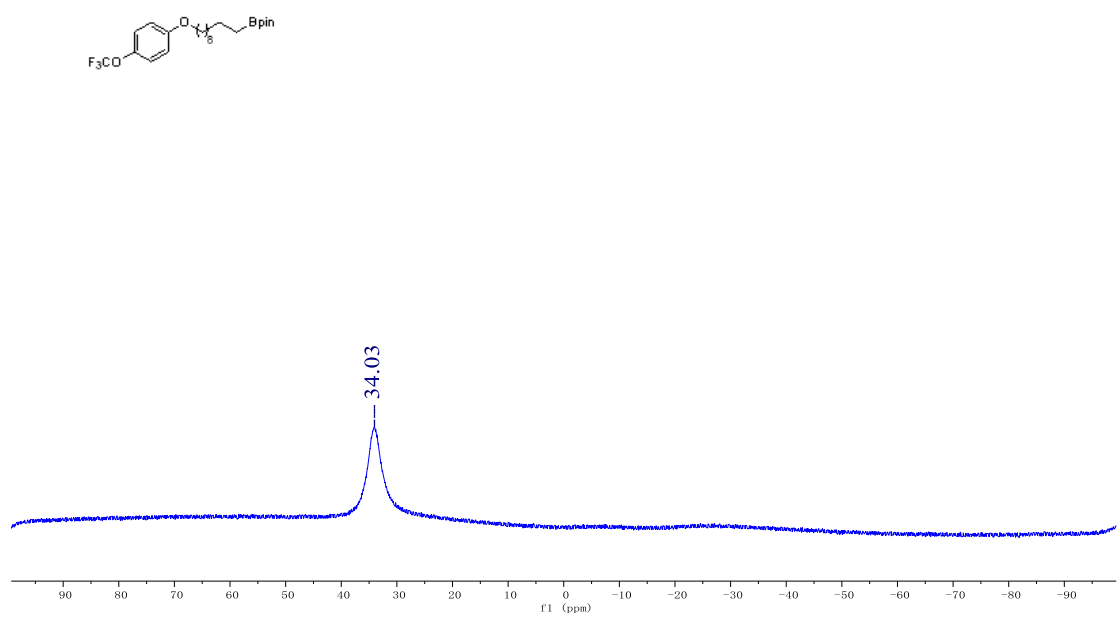

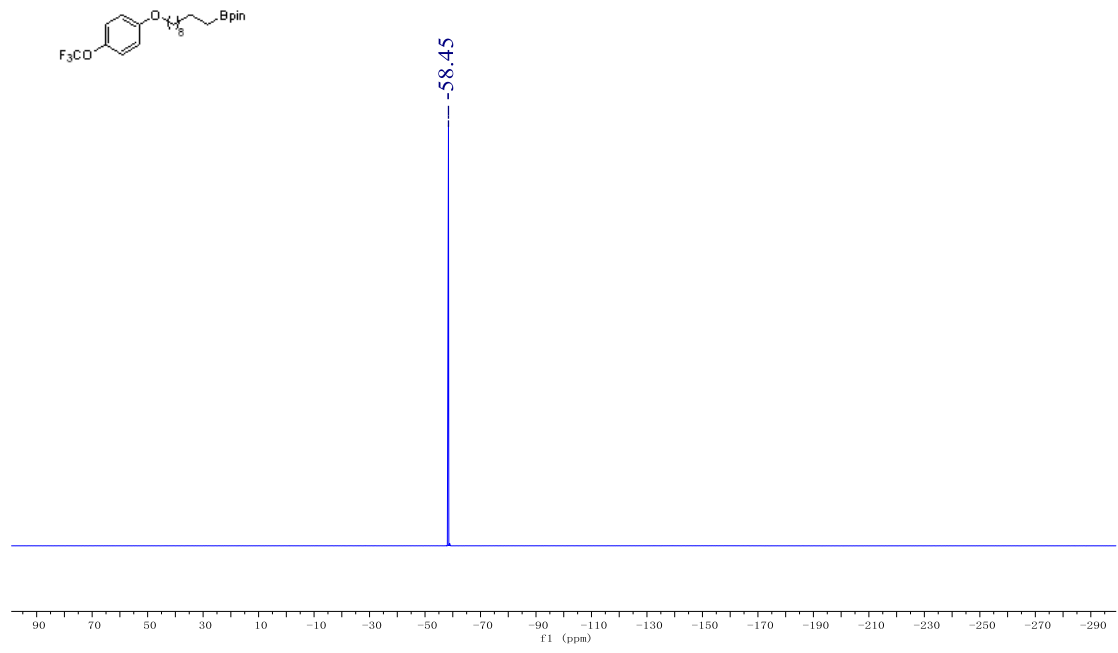

31

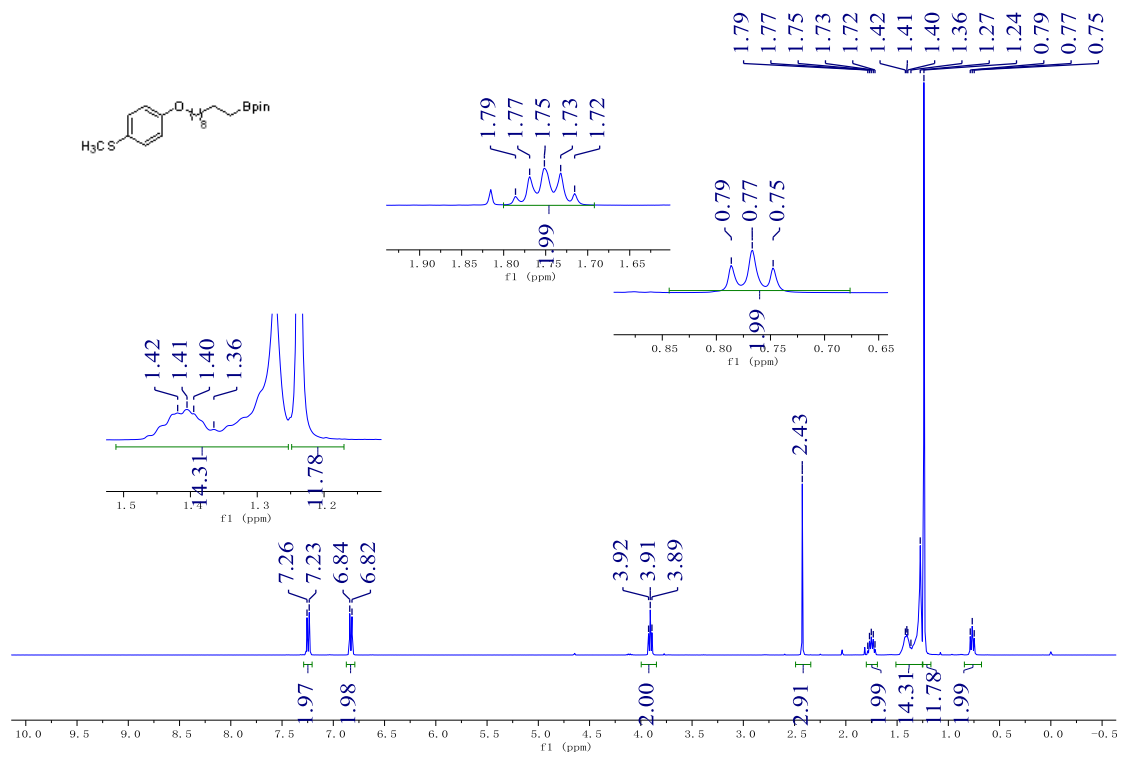

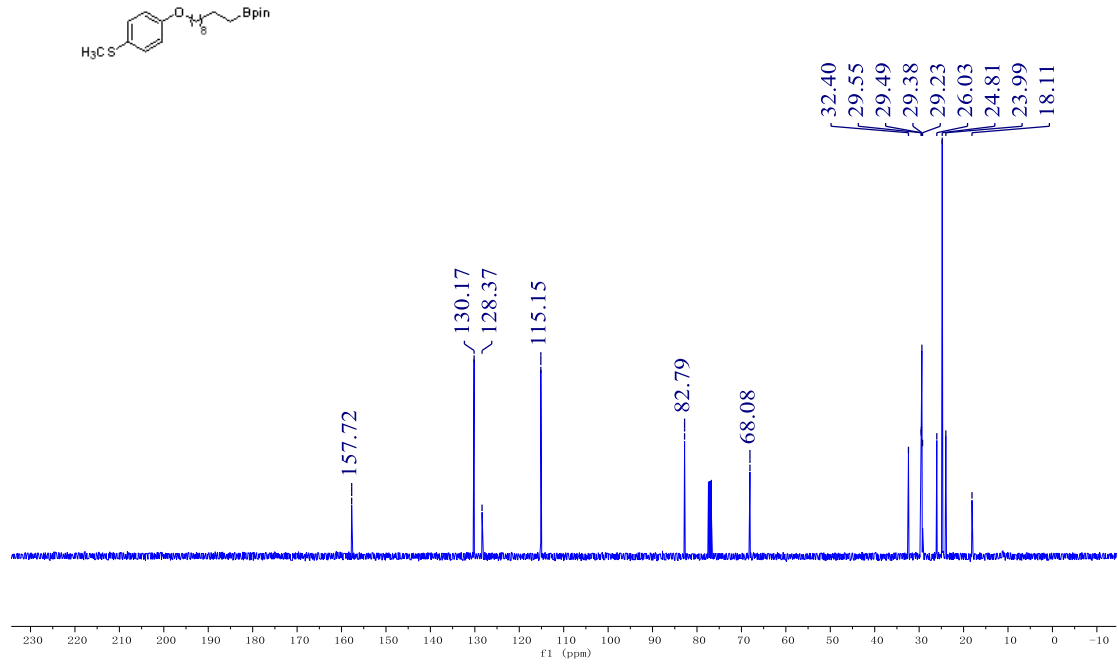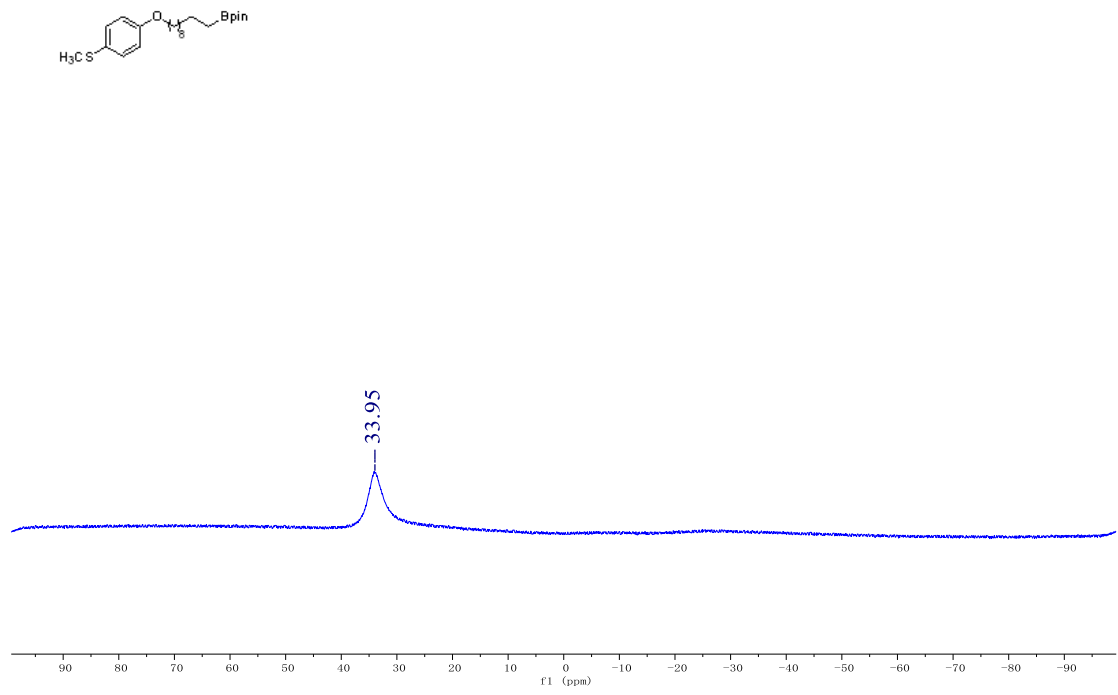

3m

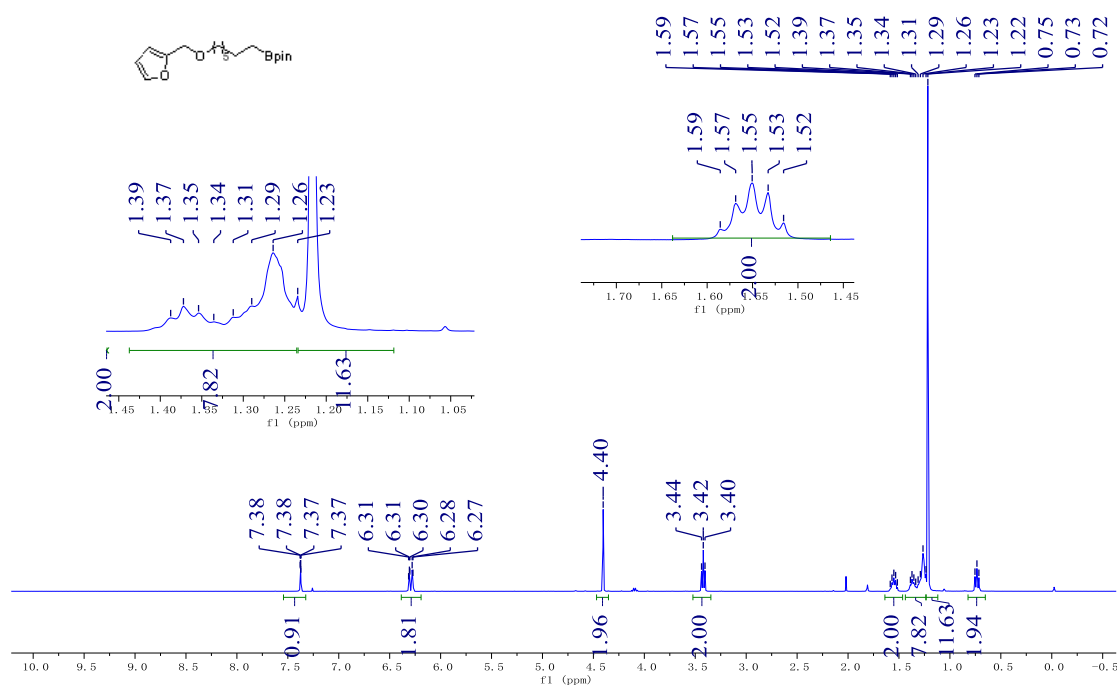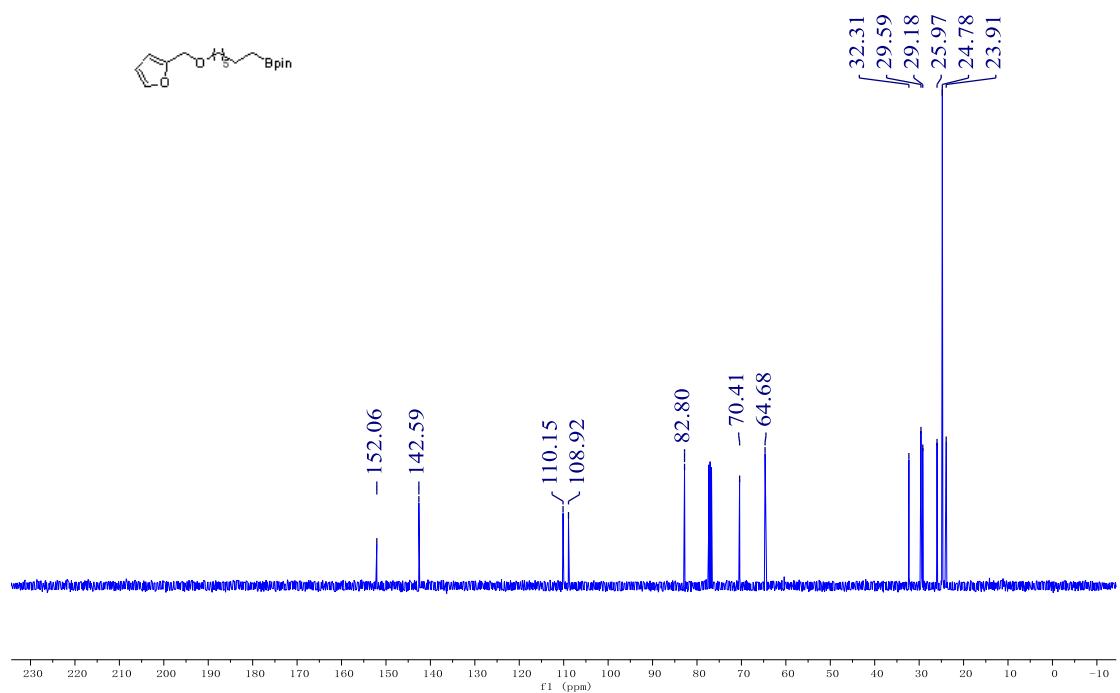

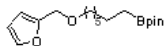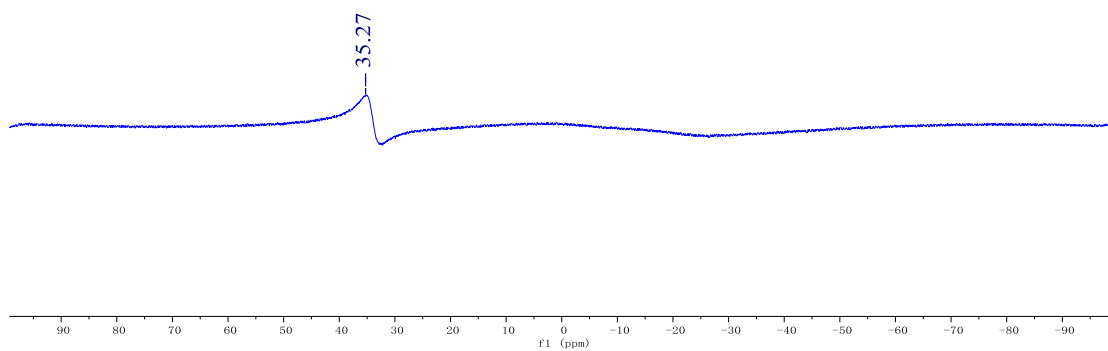

3n

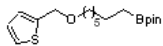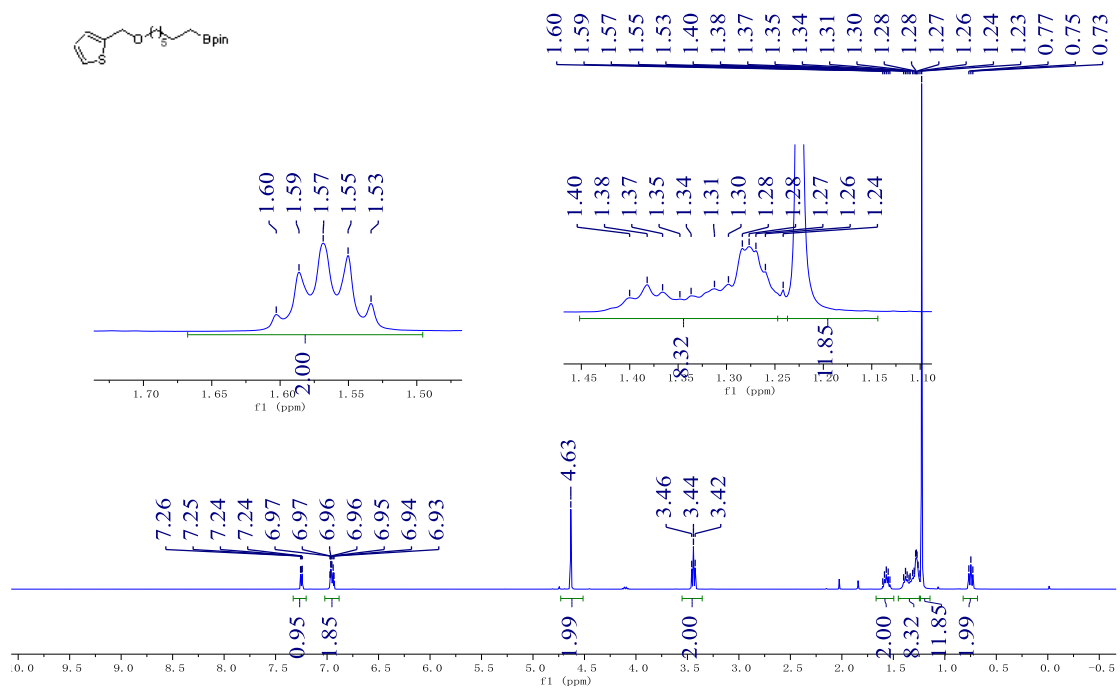

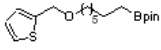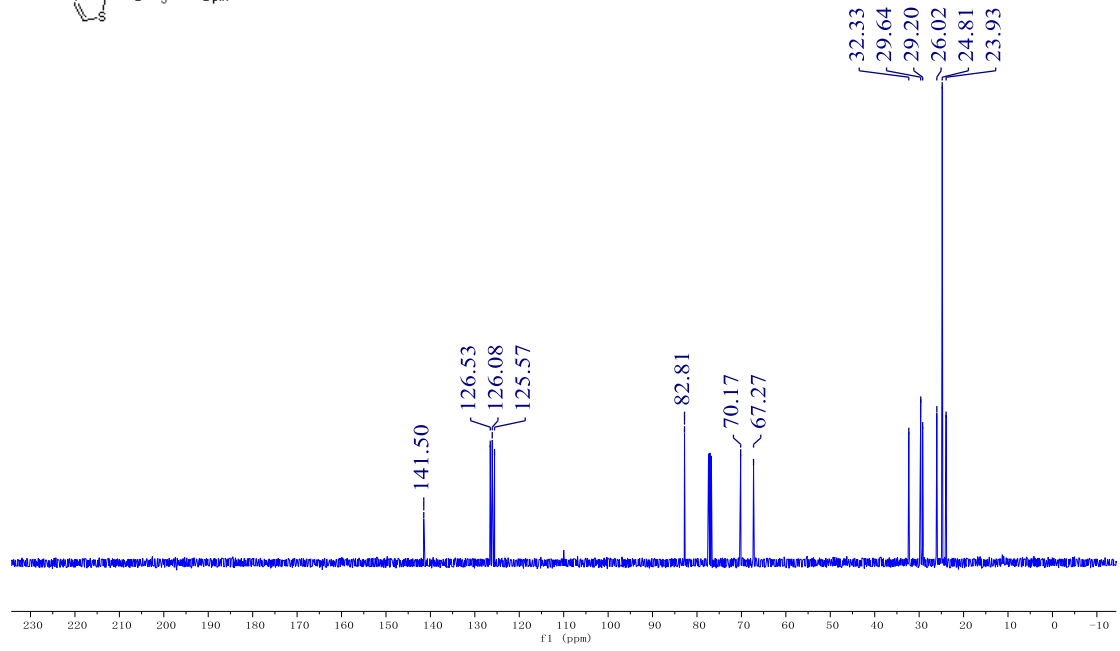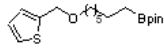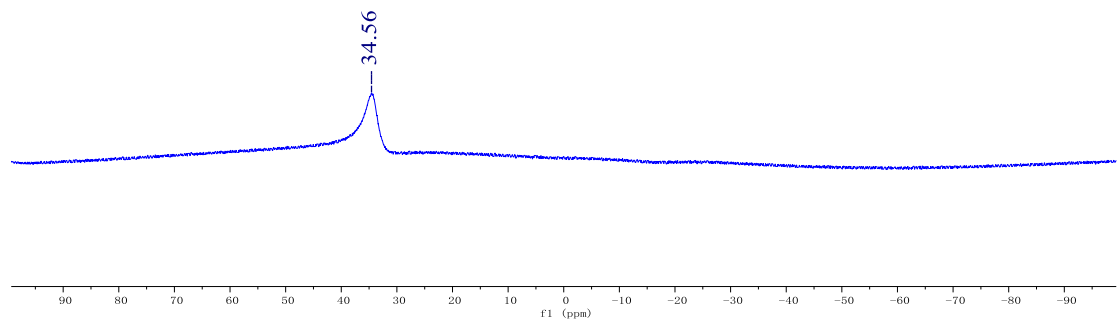

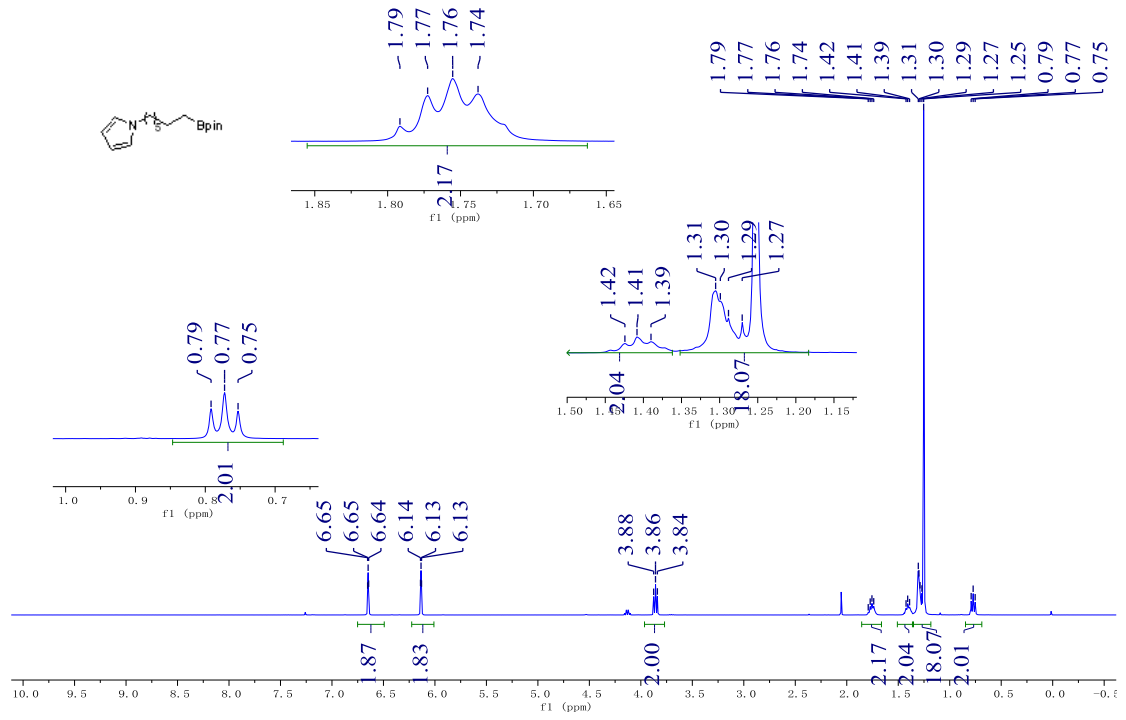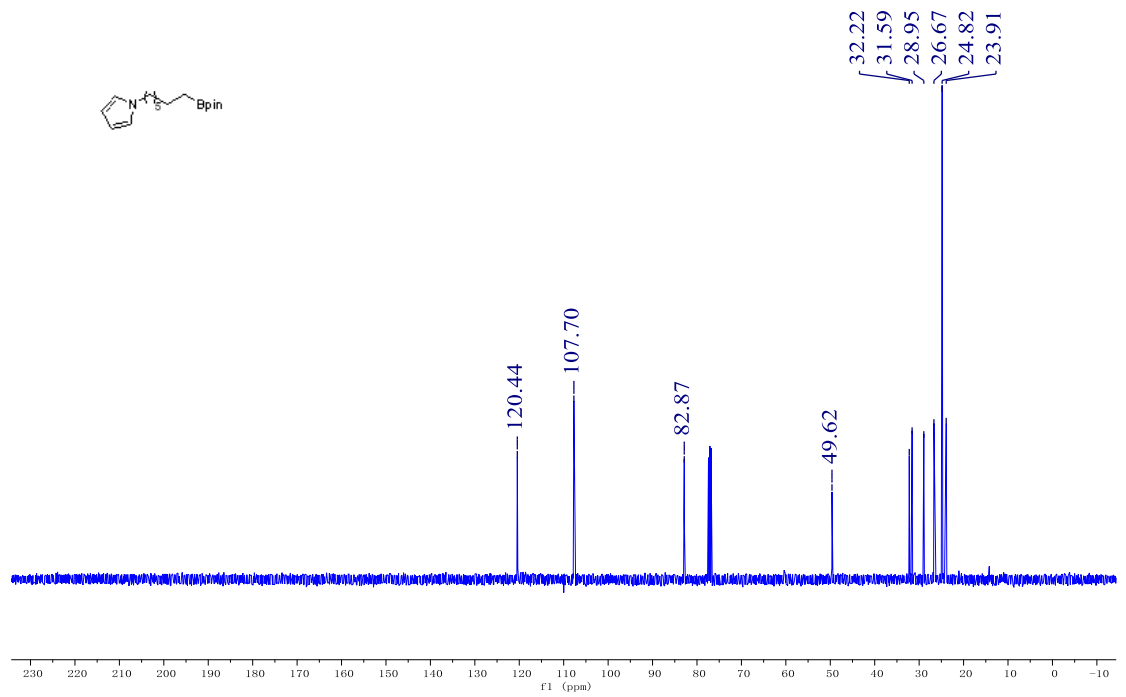



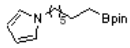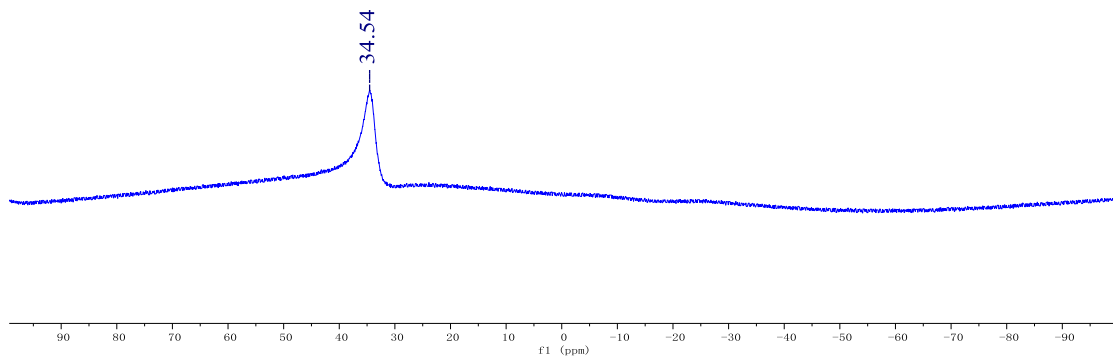

3p

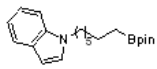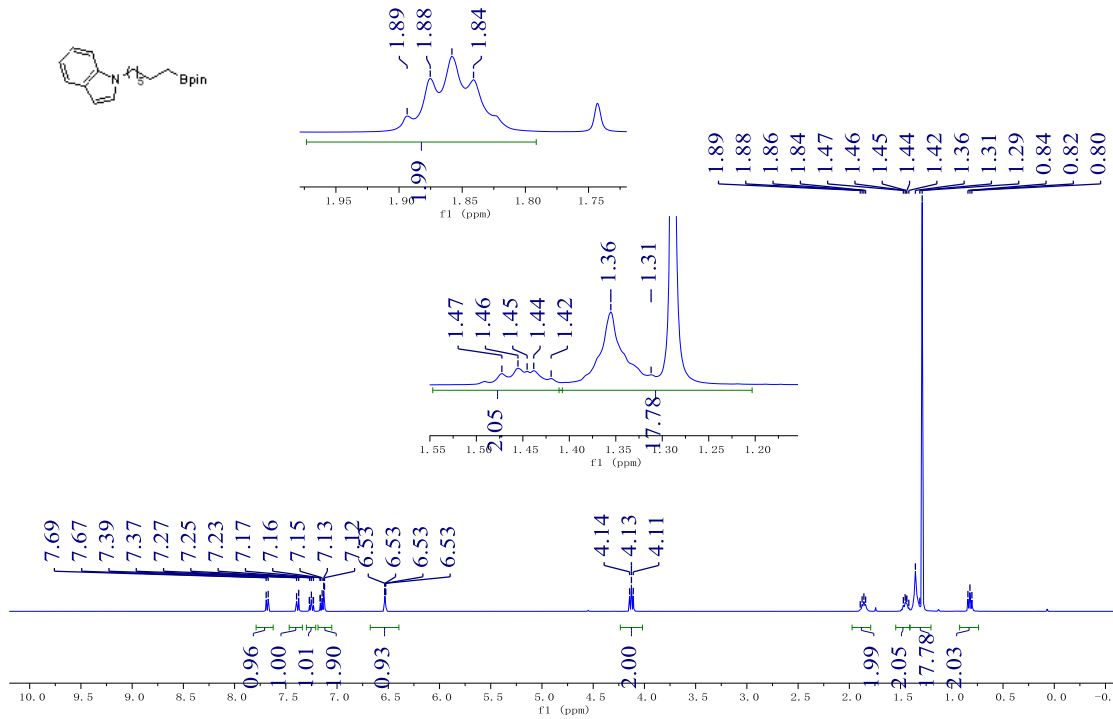

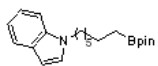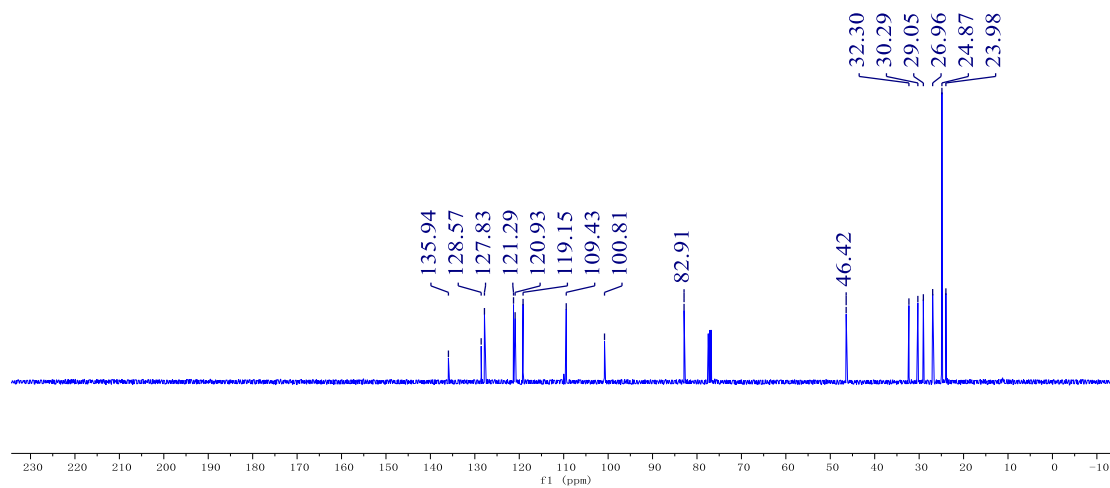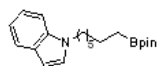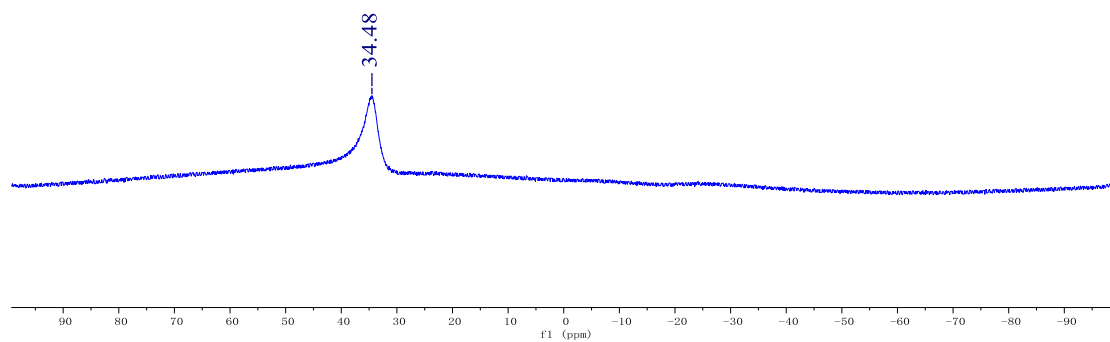

3q

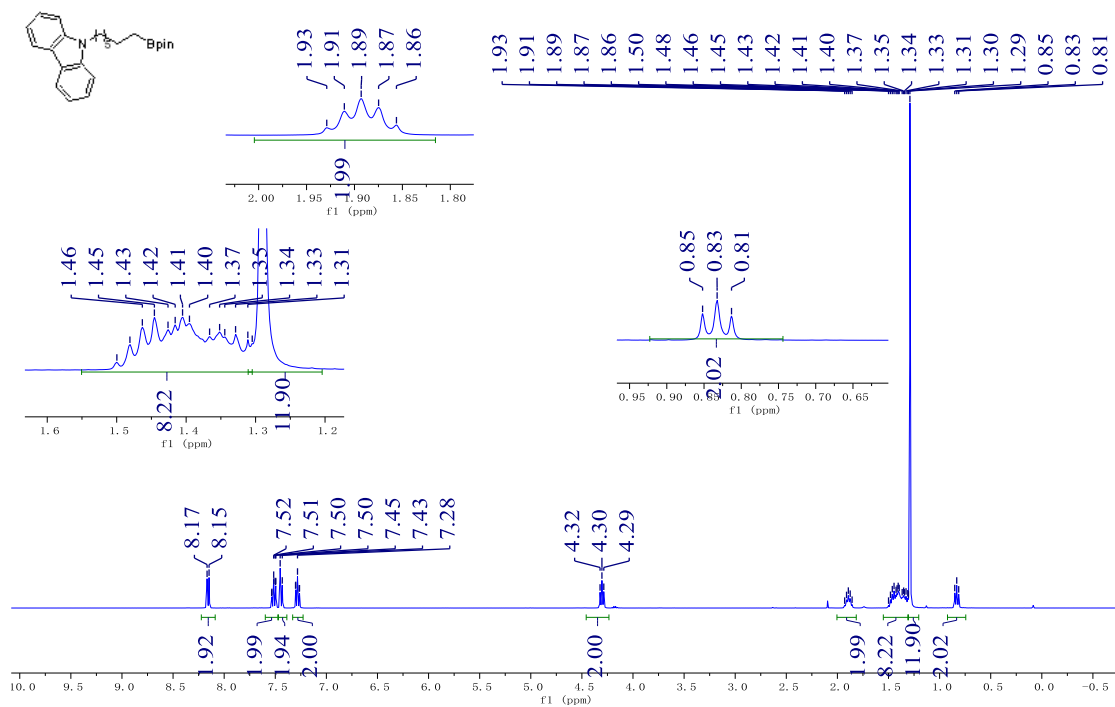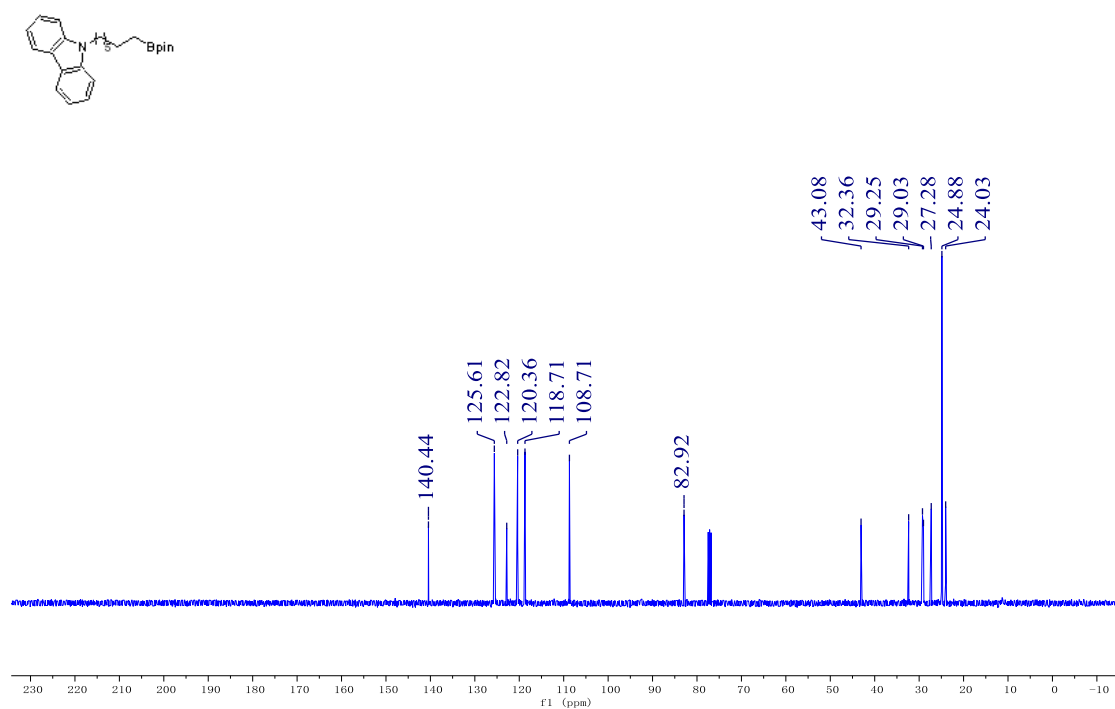

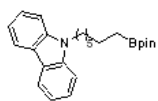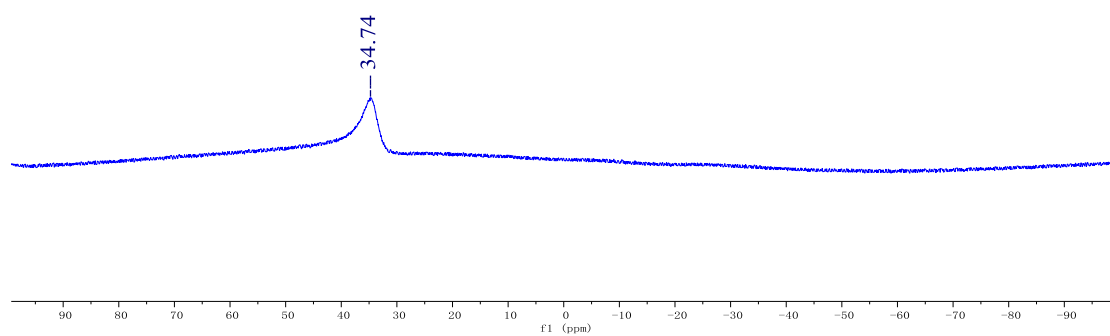

3r

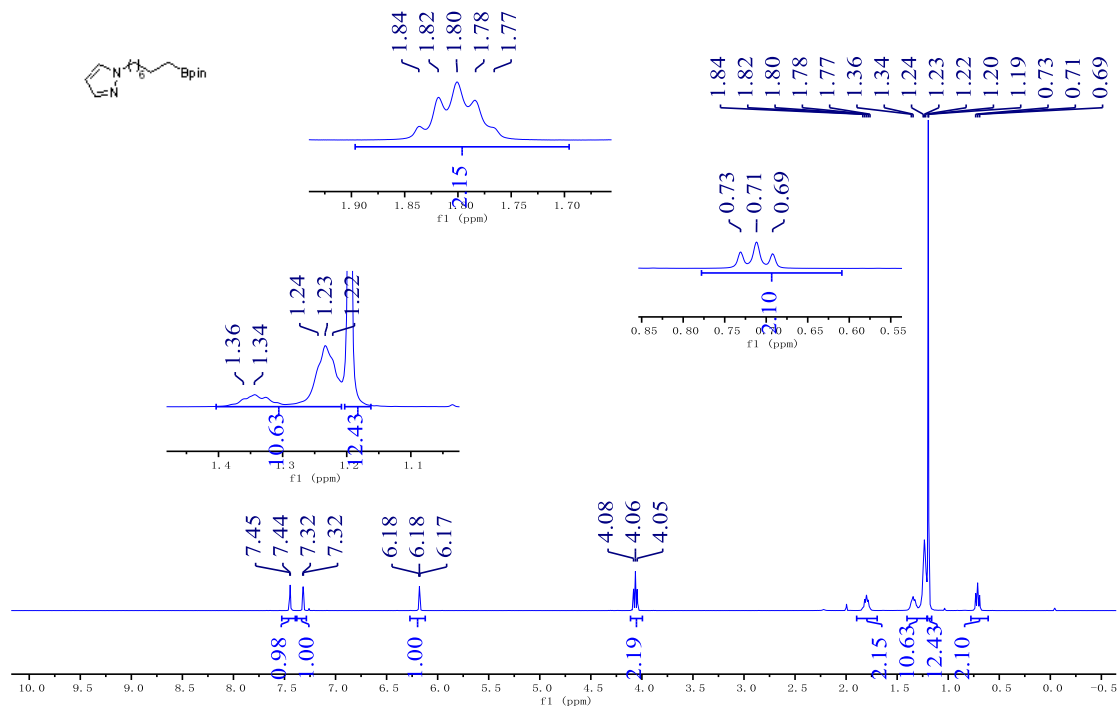

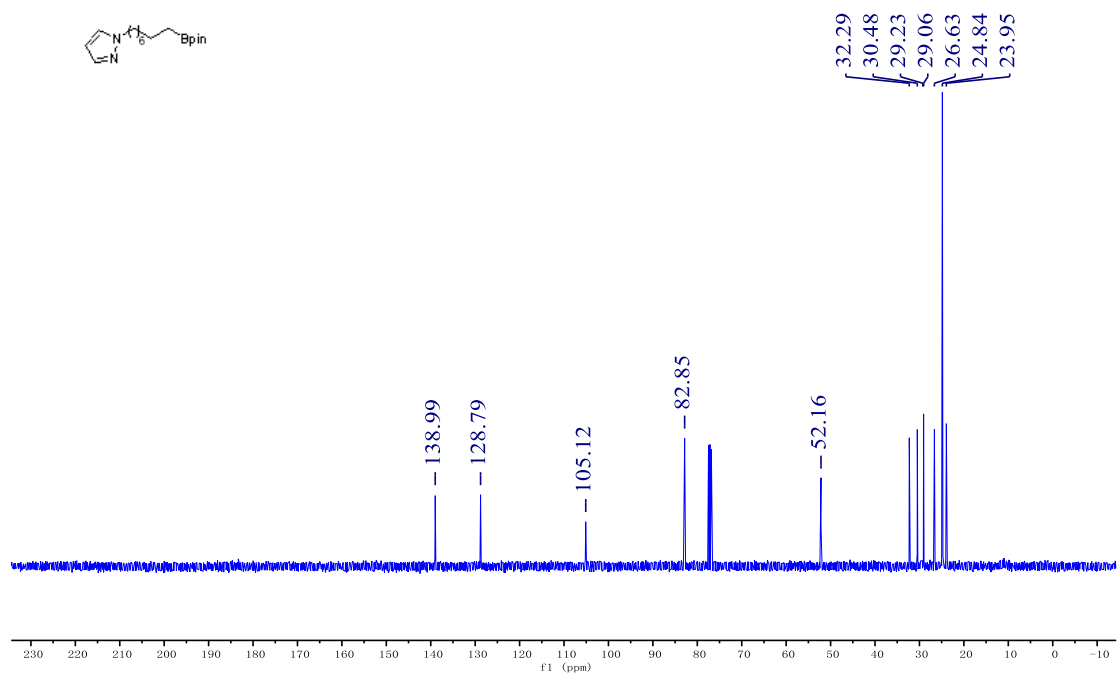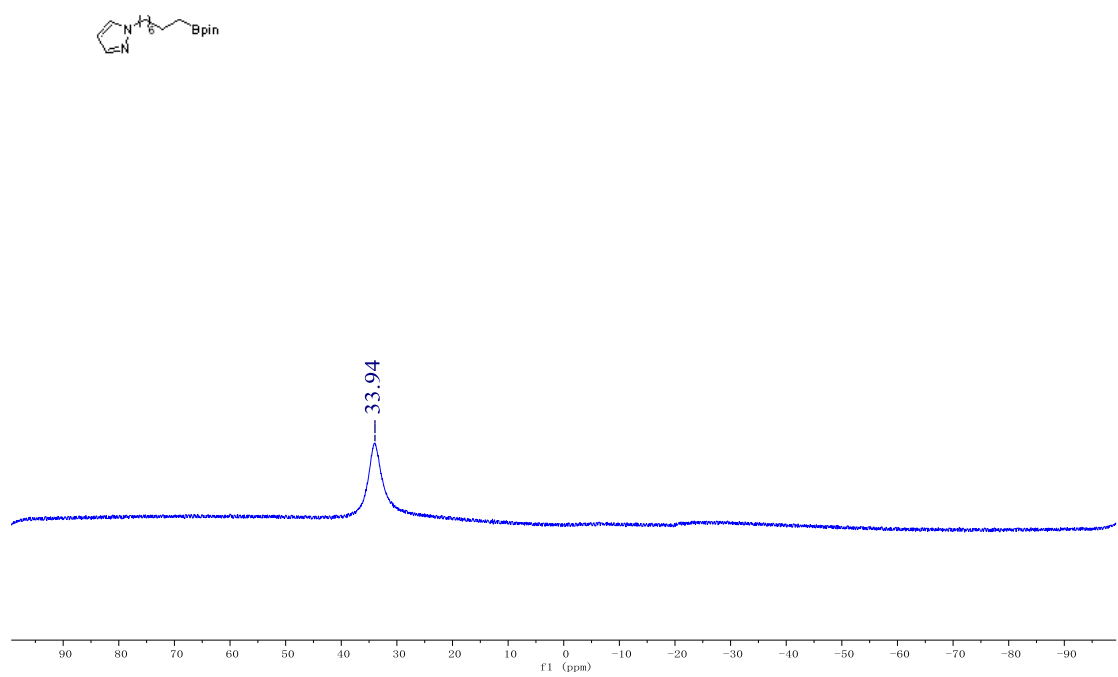

5a

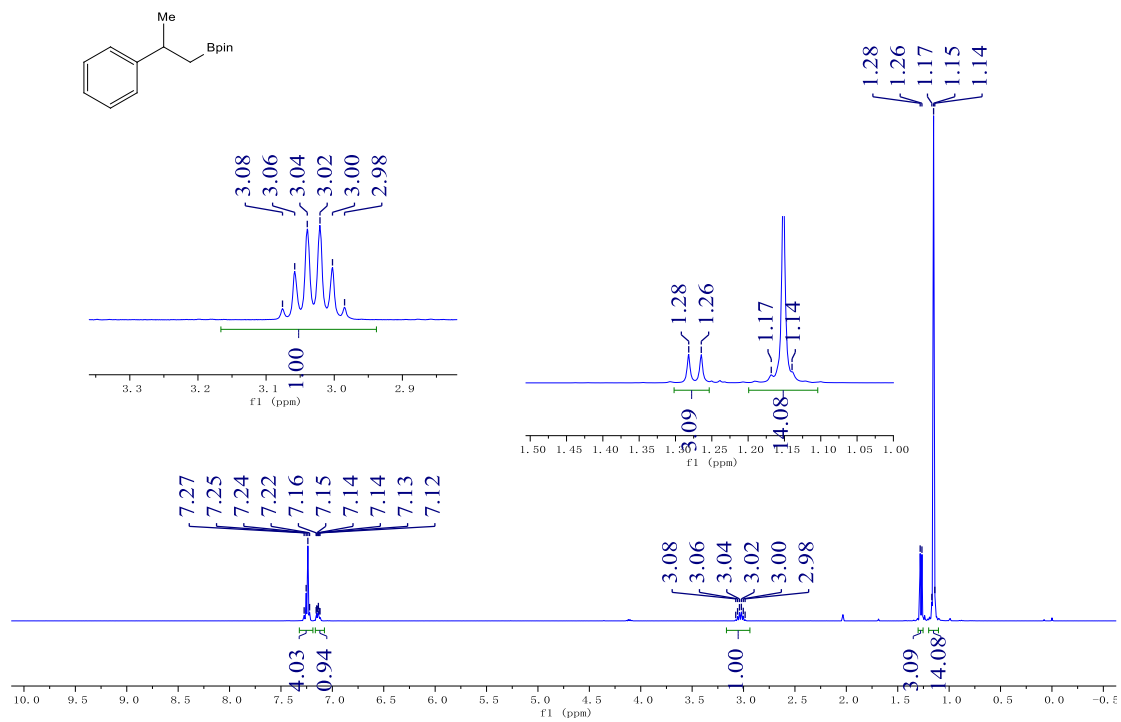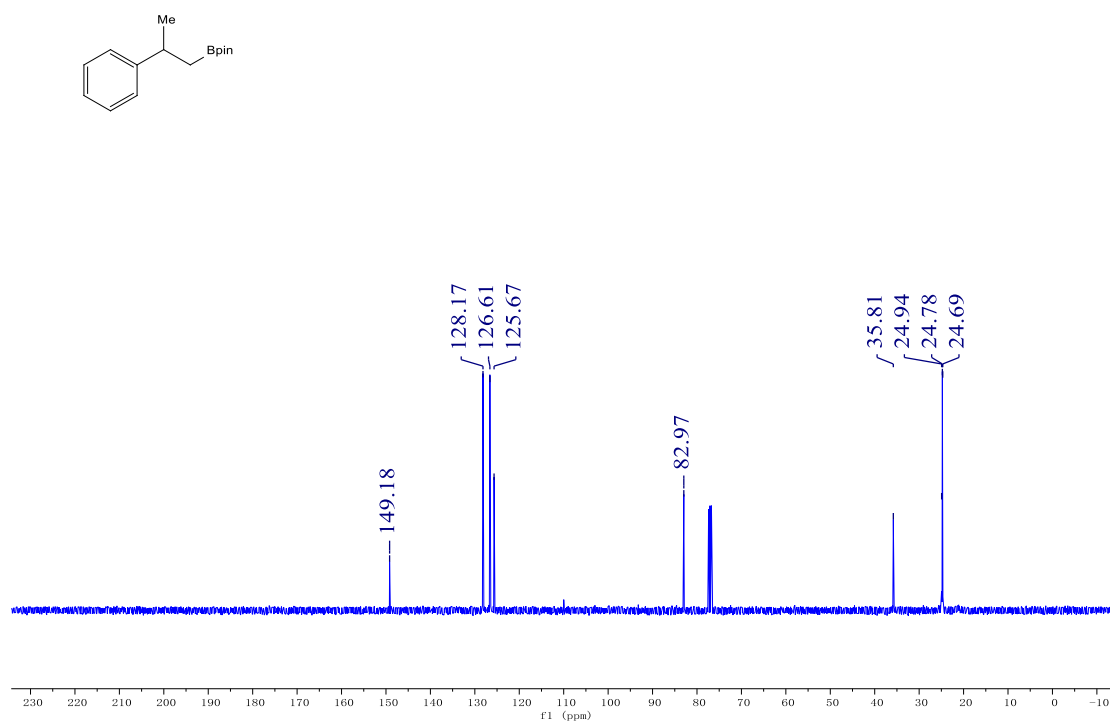

5b

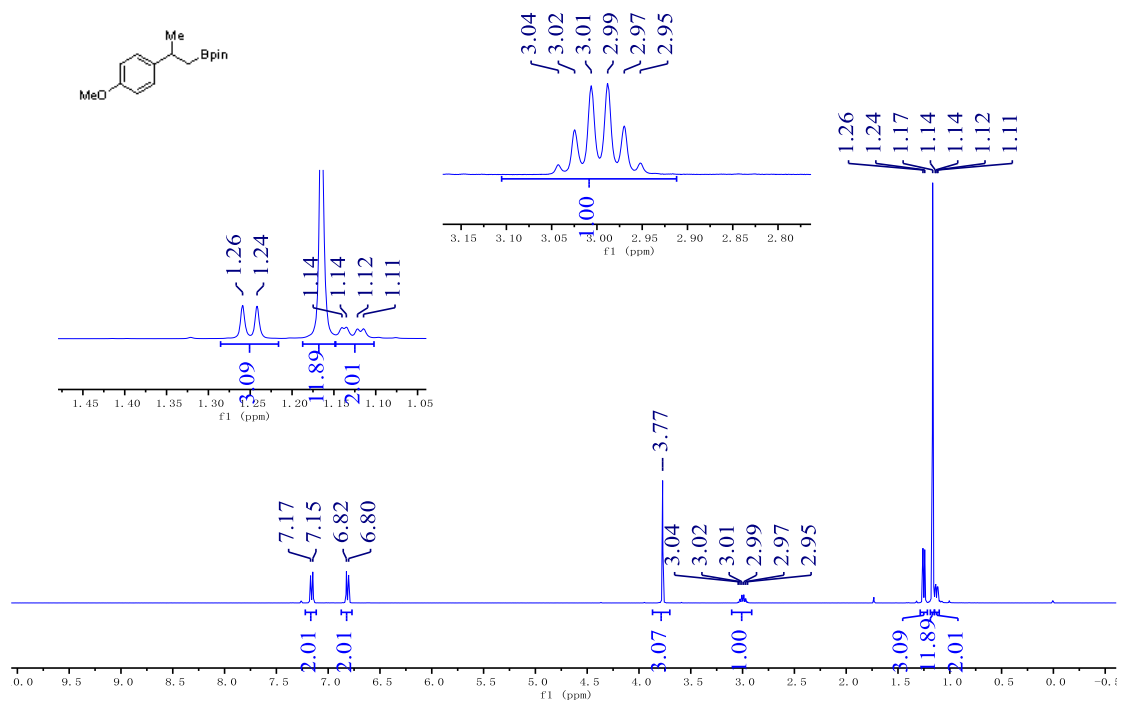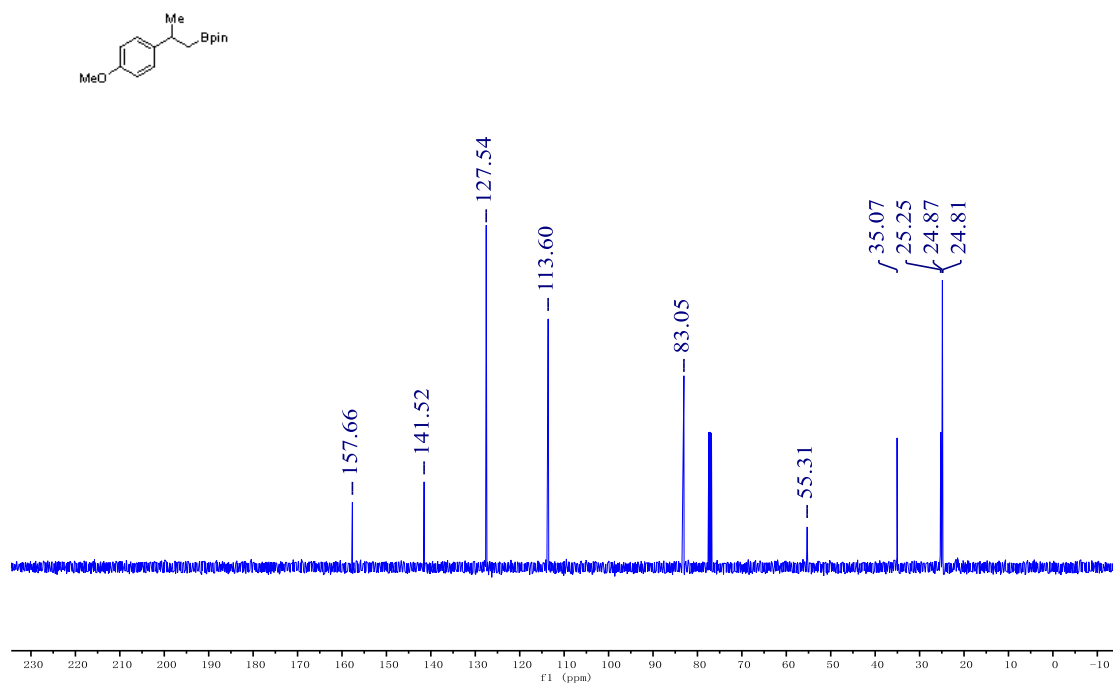

5c

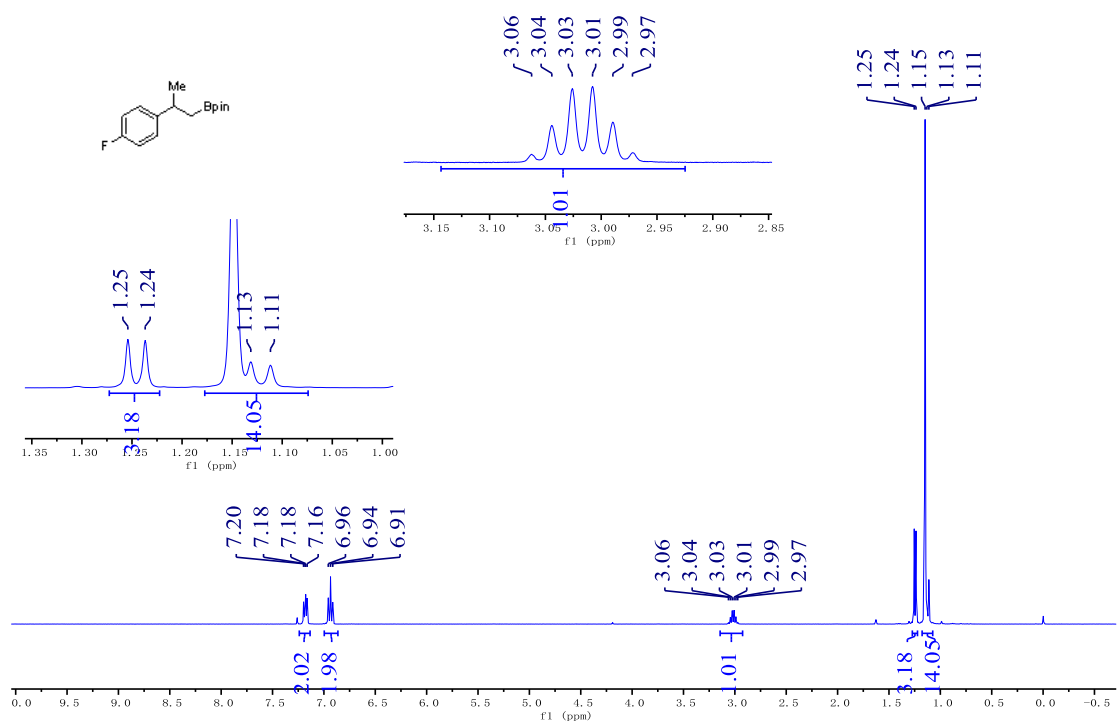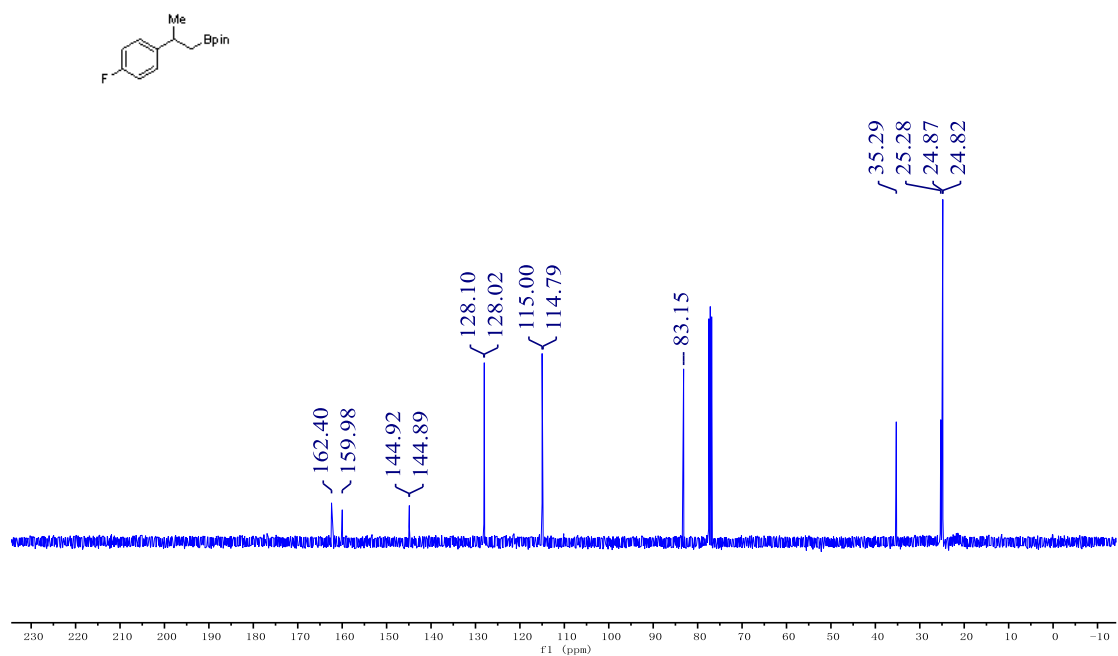



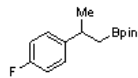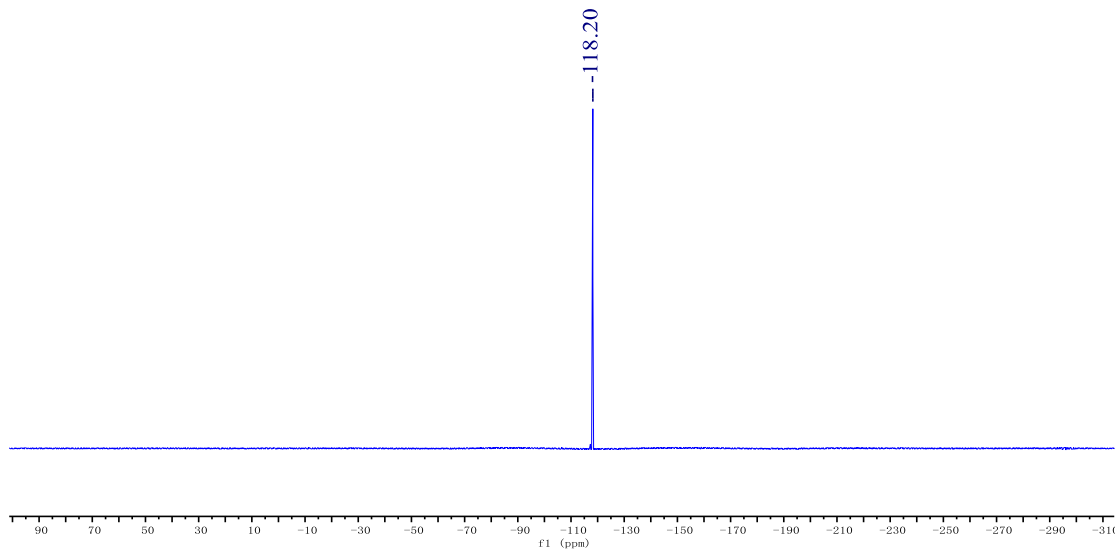

5d

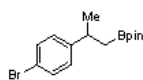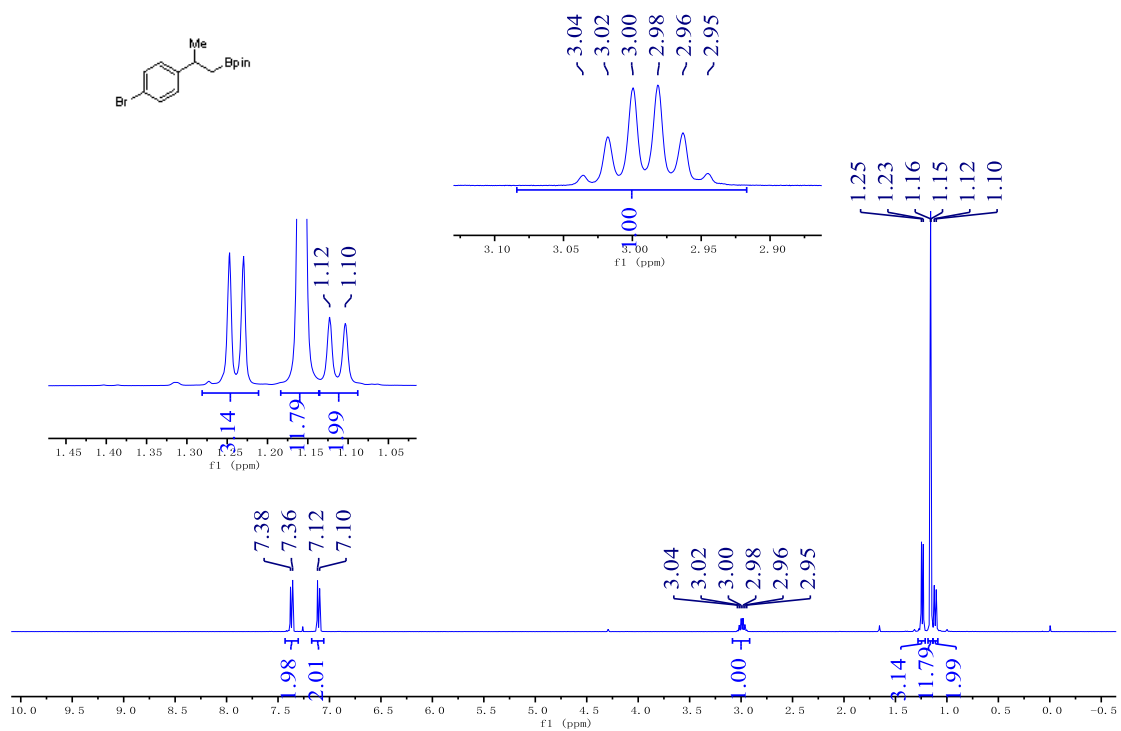

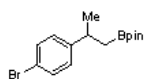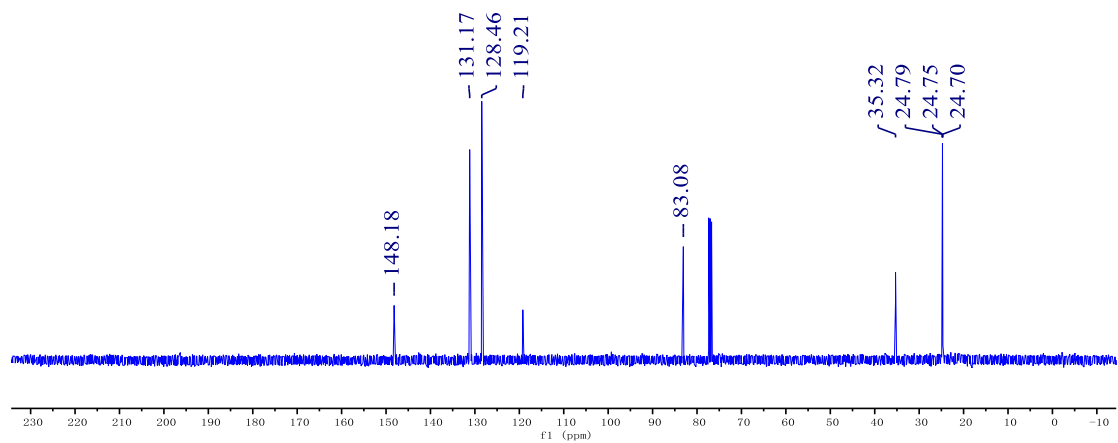

5e

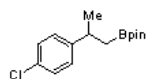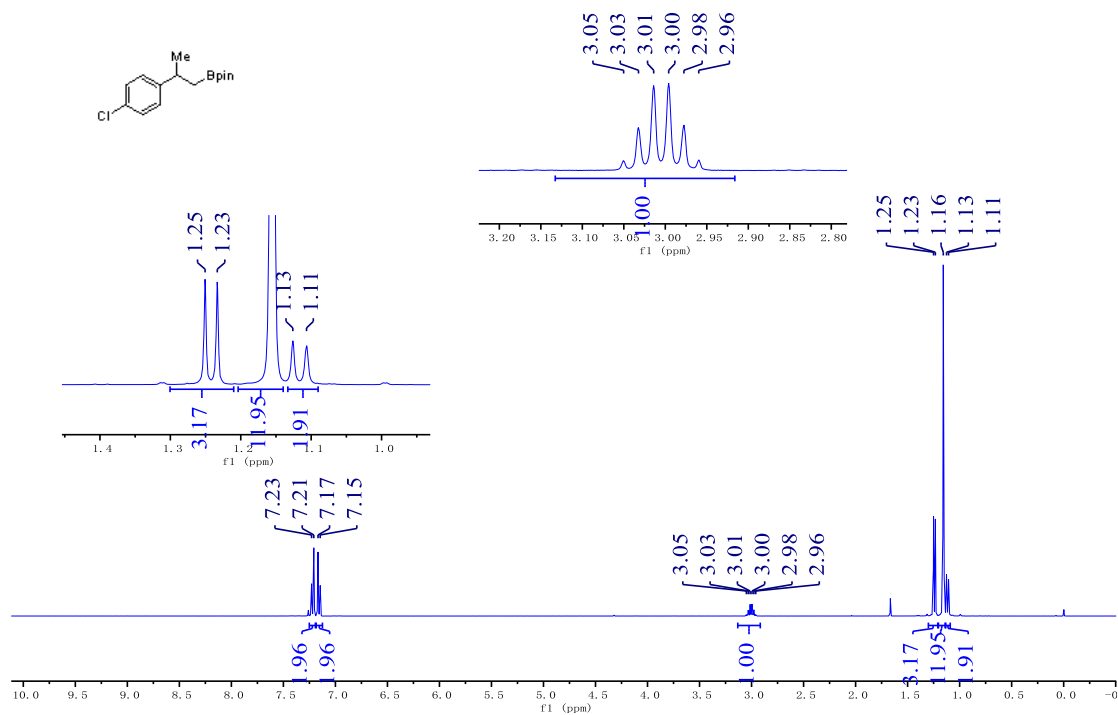

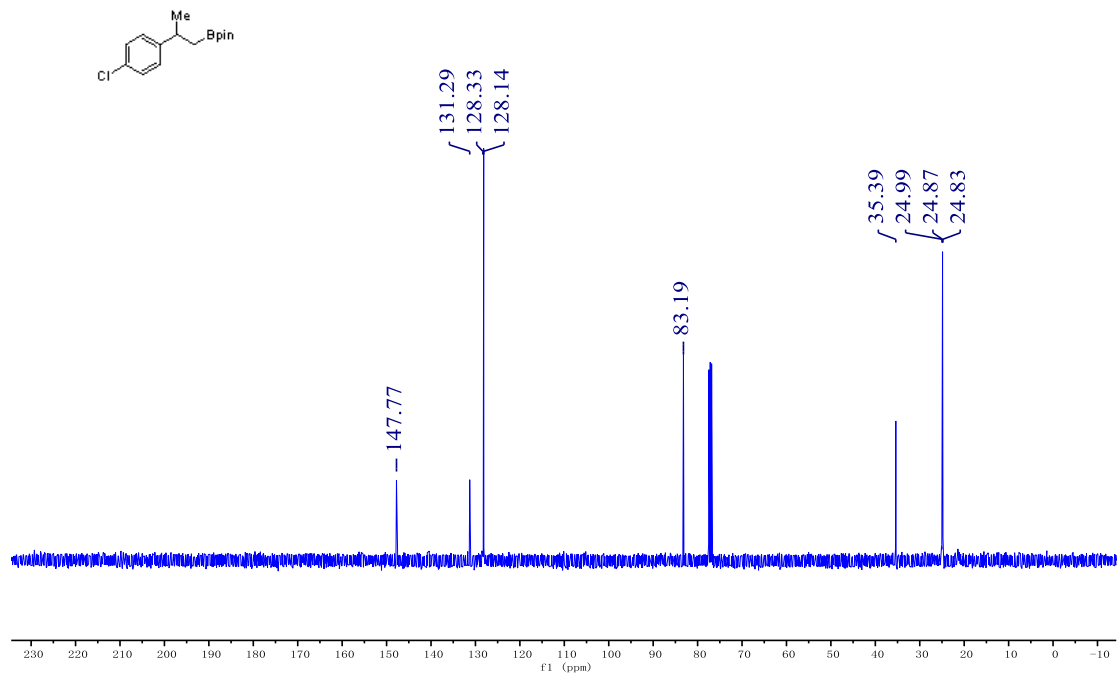

5f

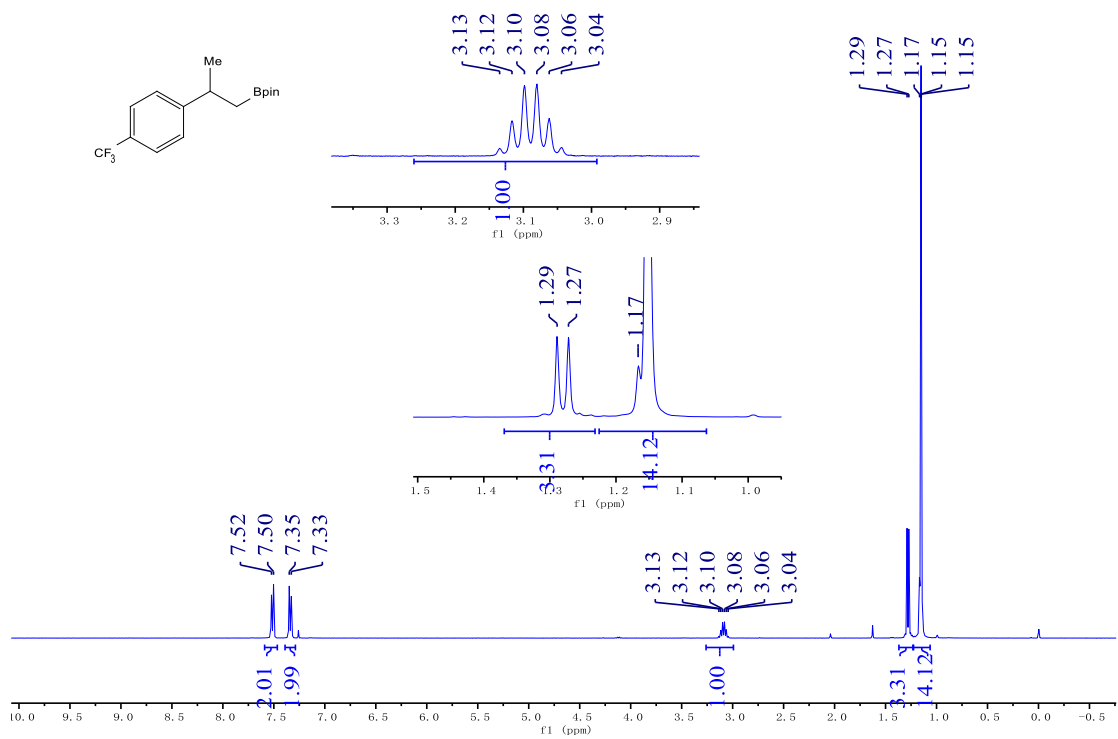

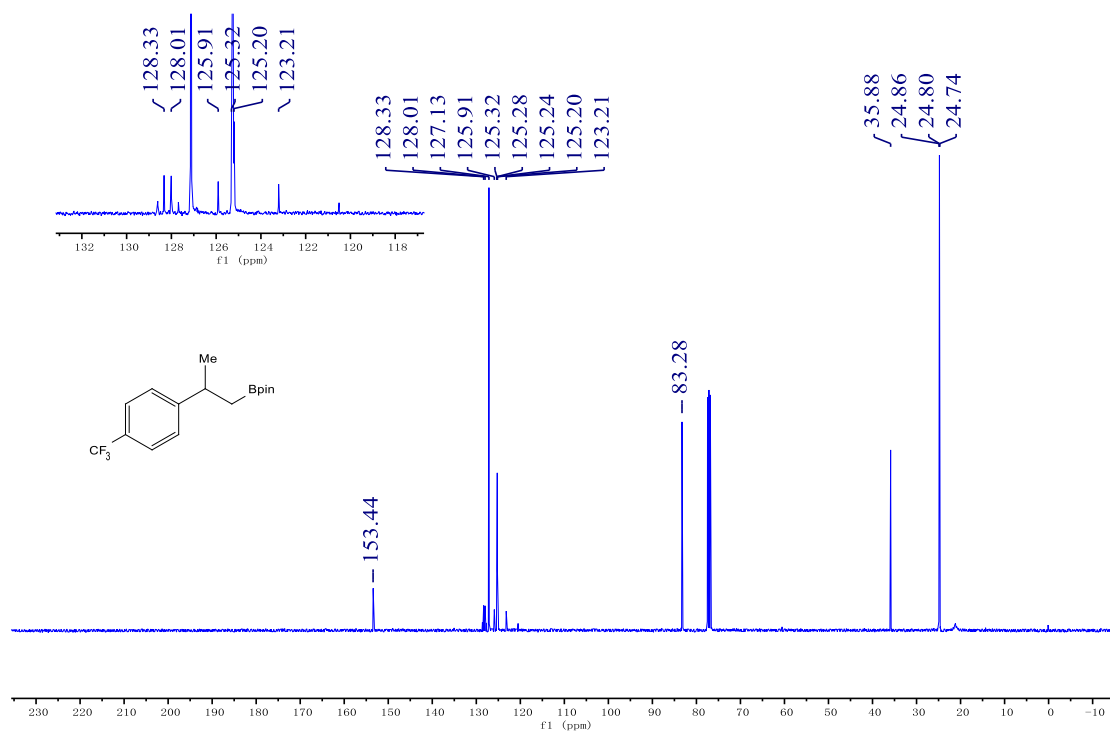

**5g**

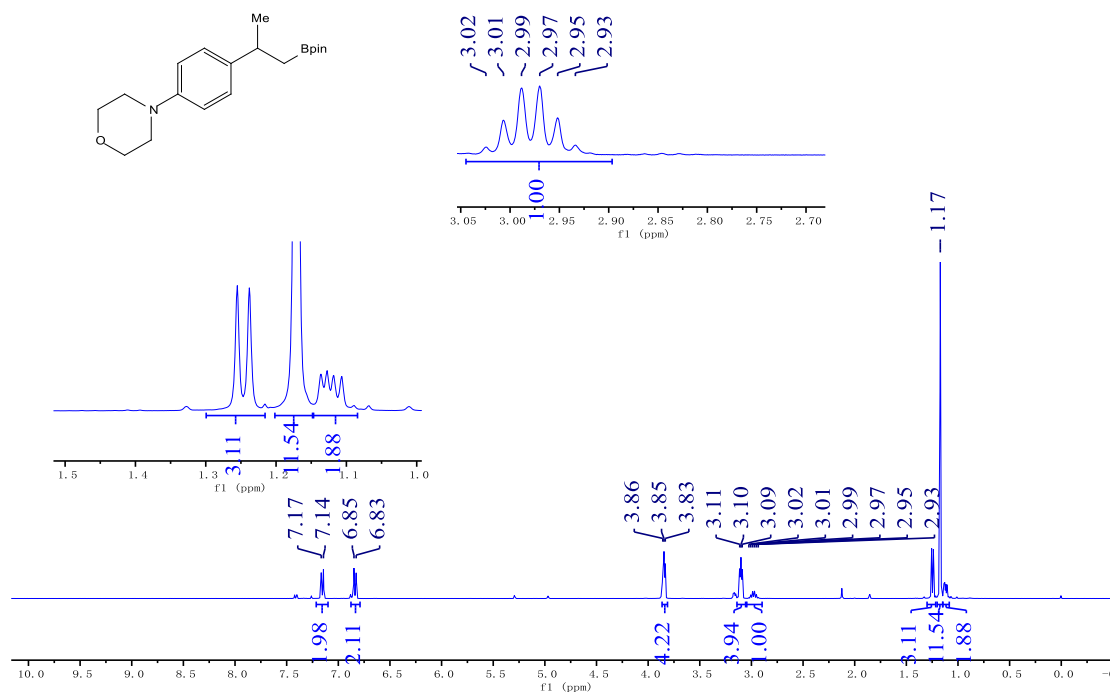

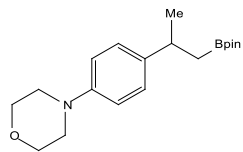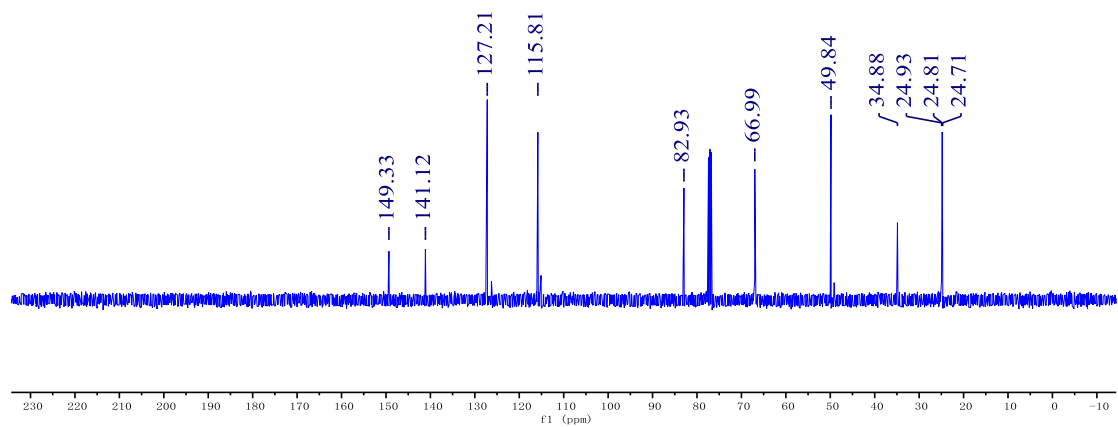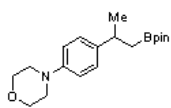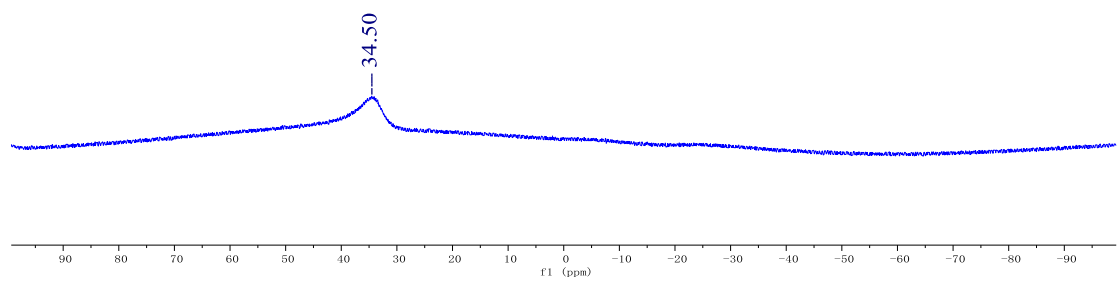

5h

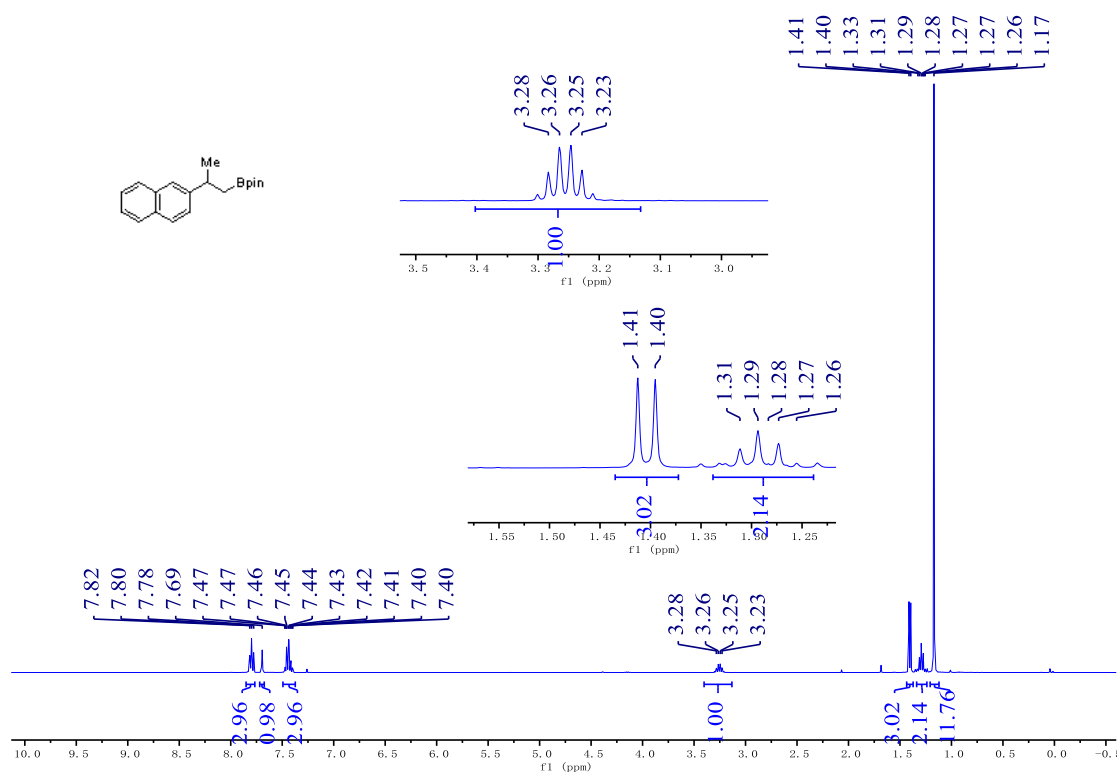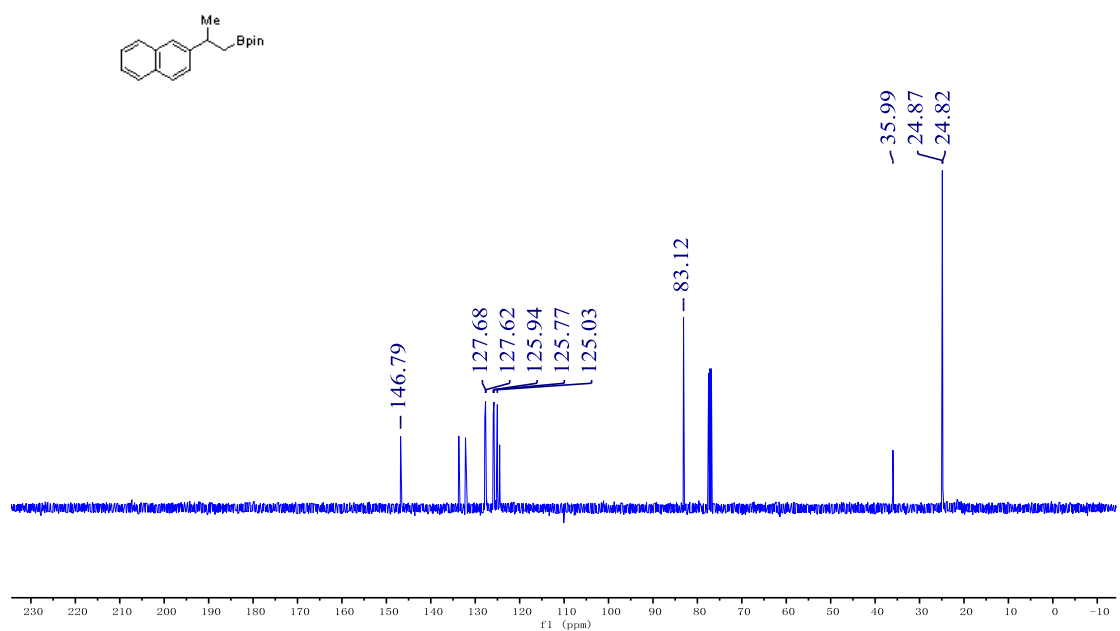

5i

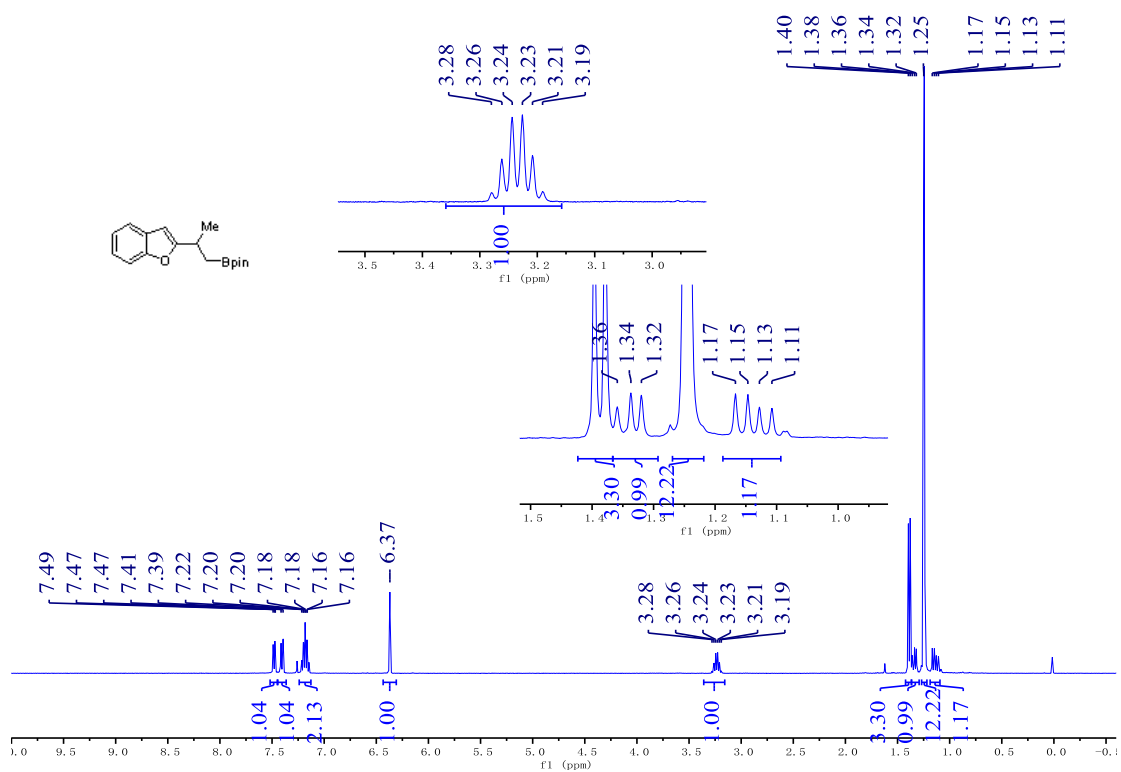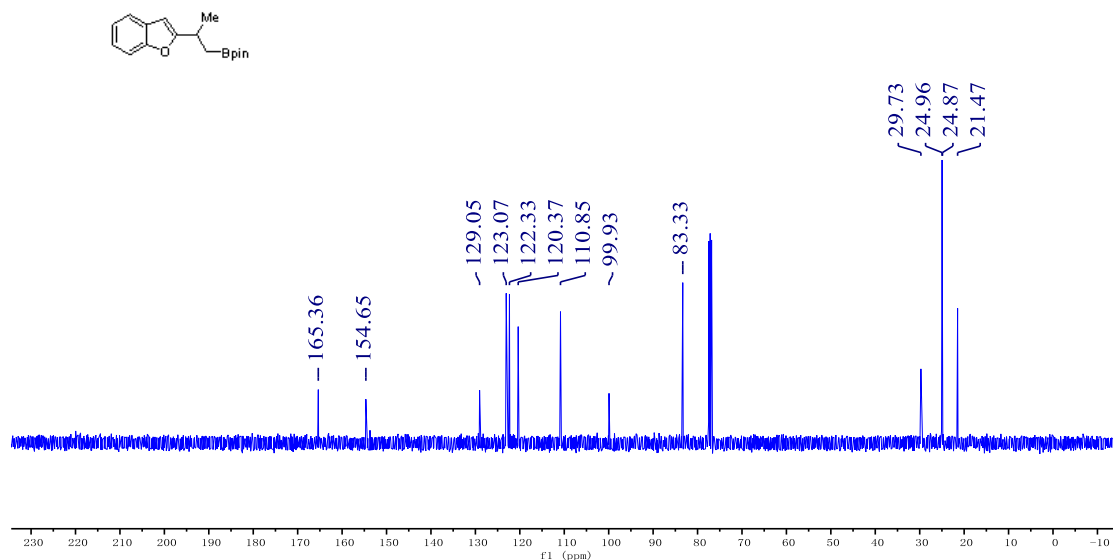

5j

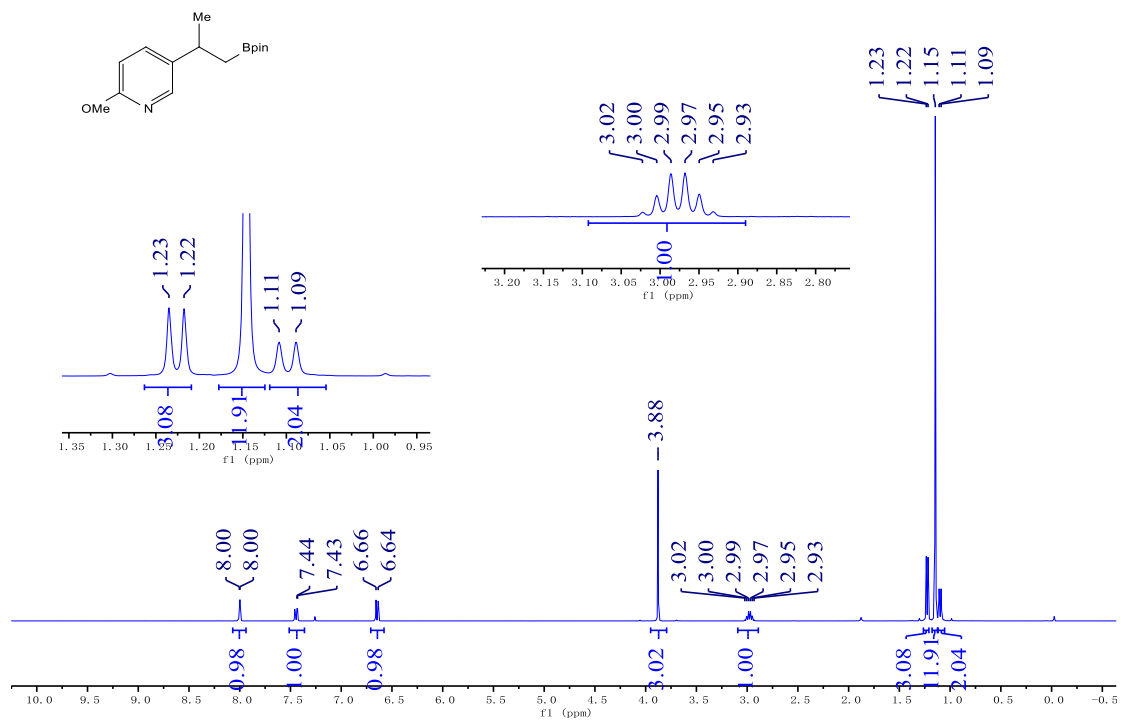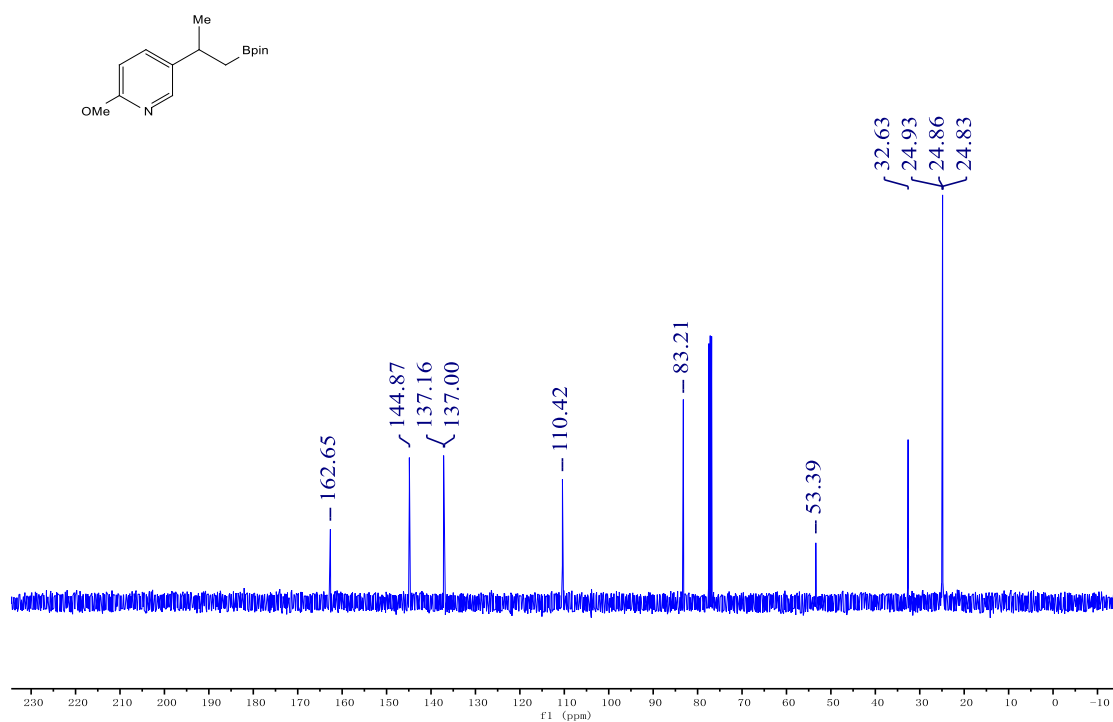



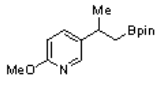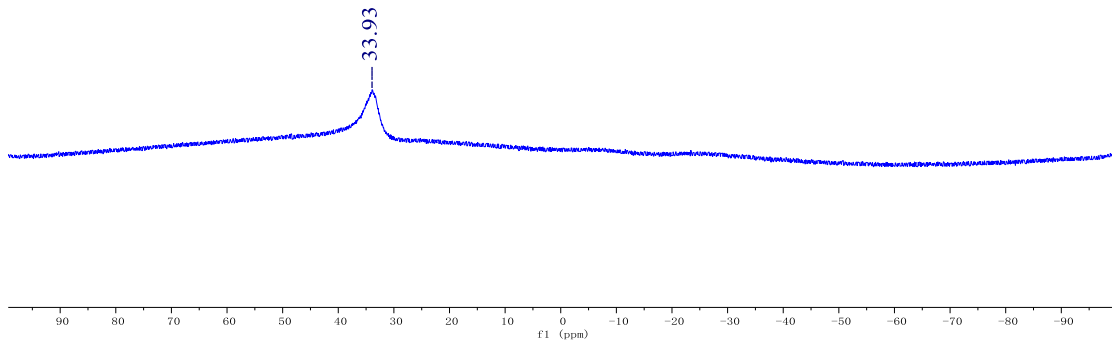

5k

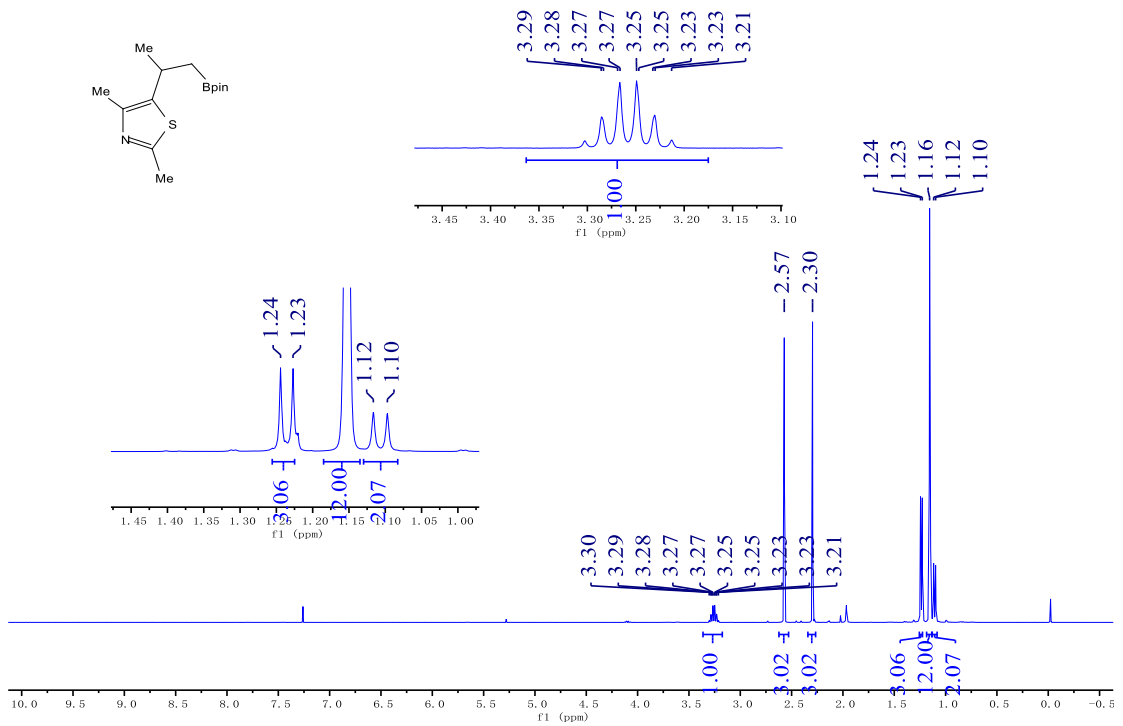

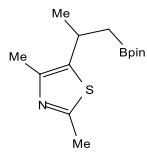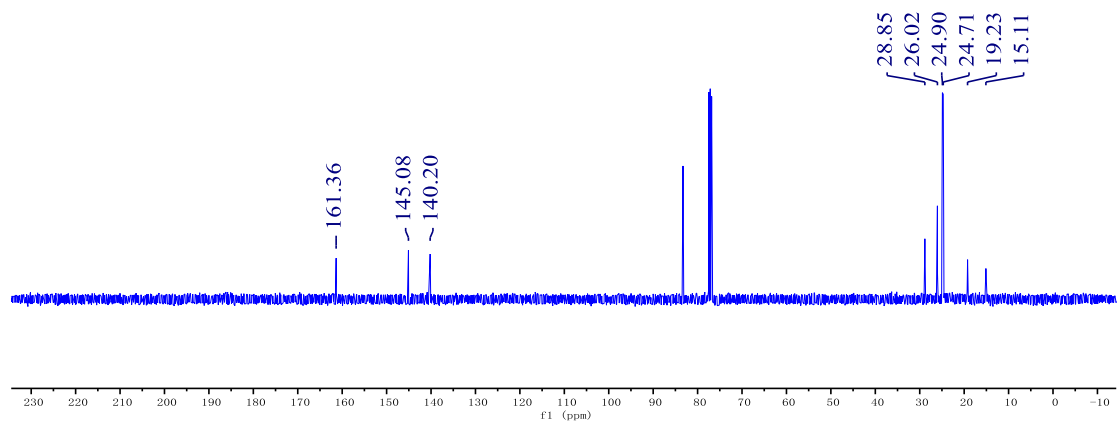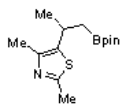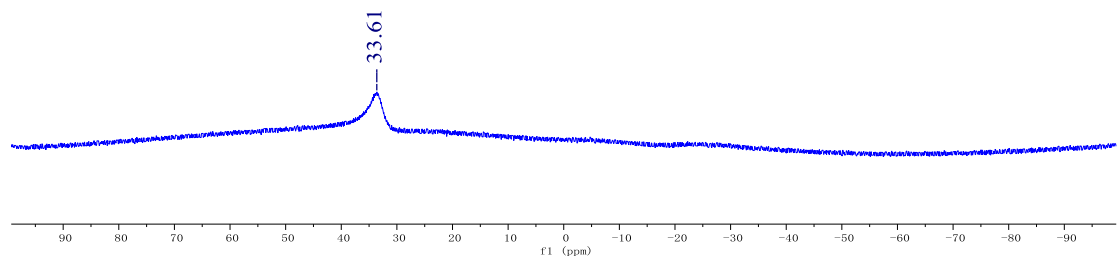

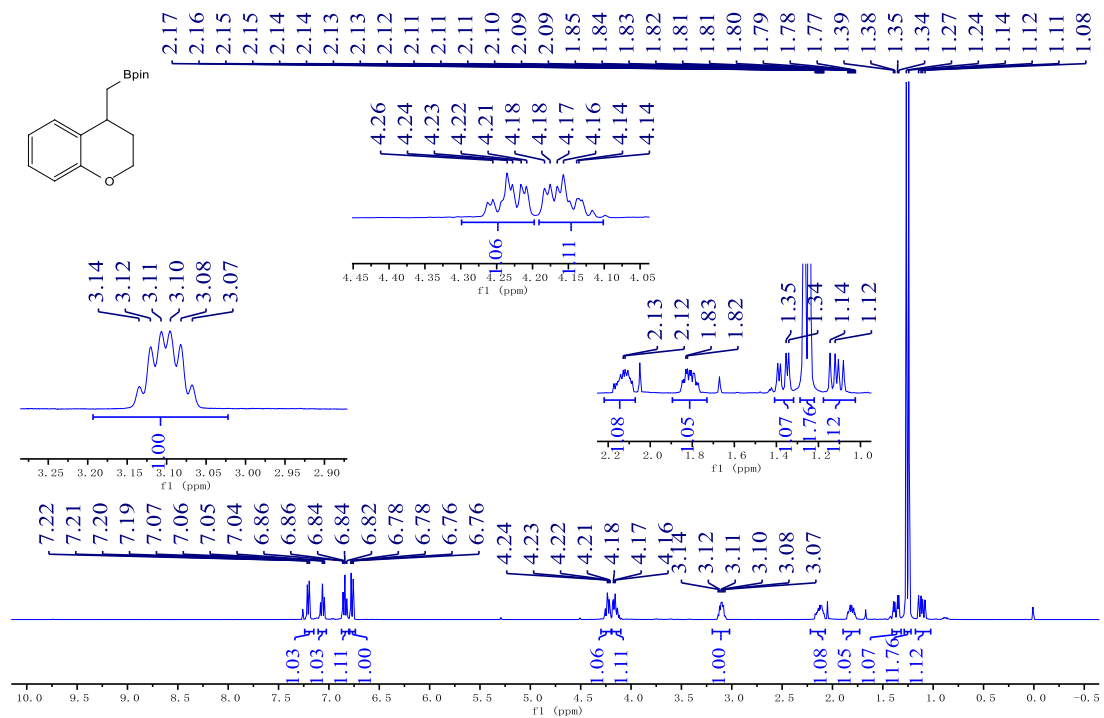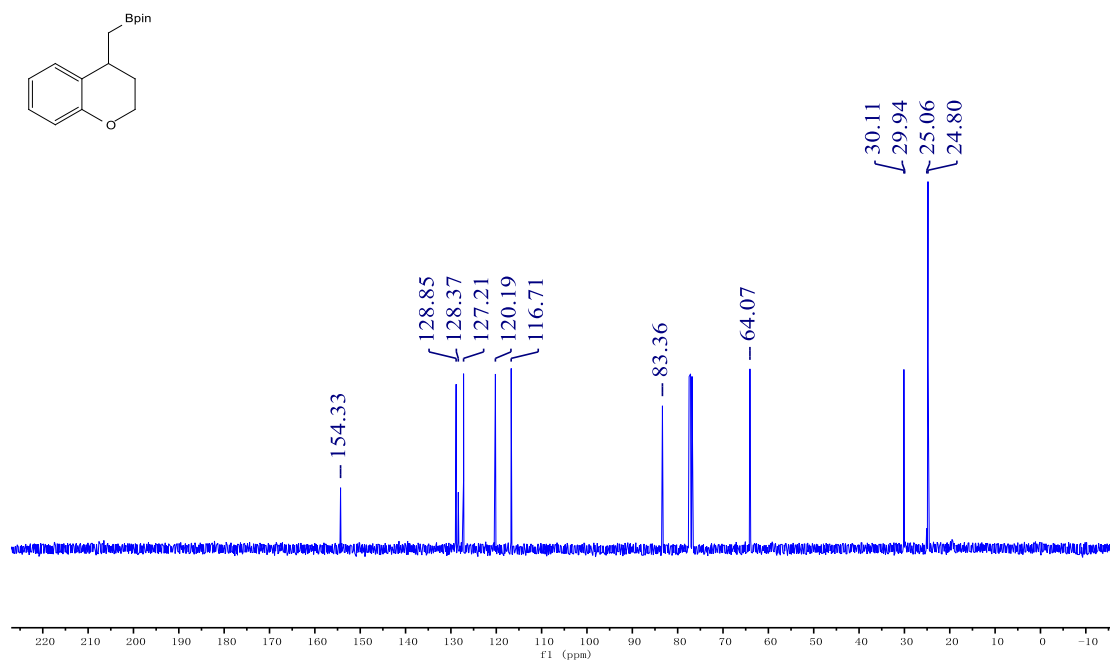

5m

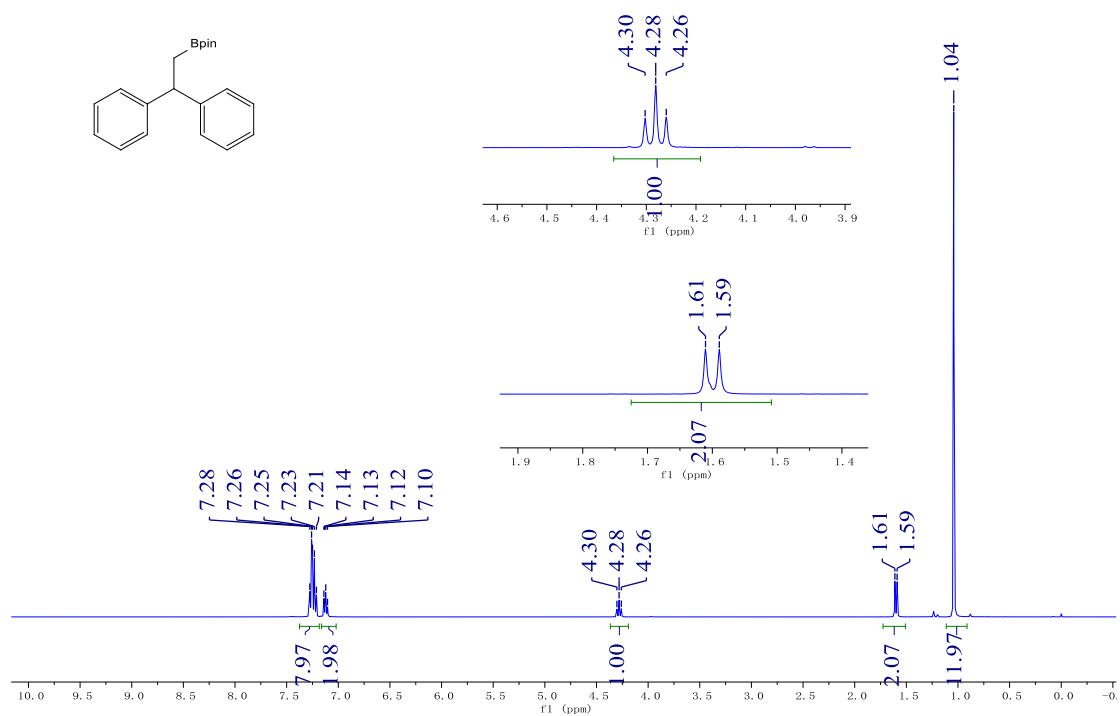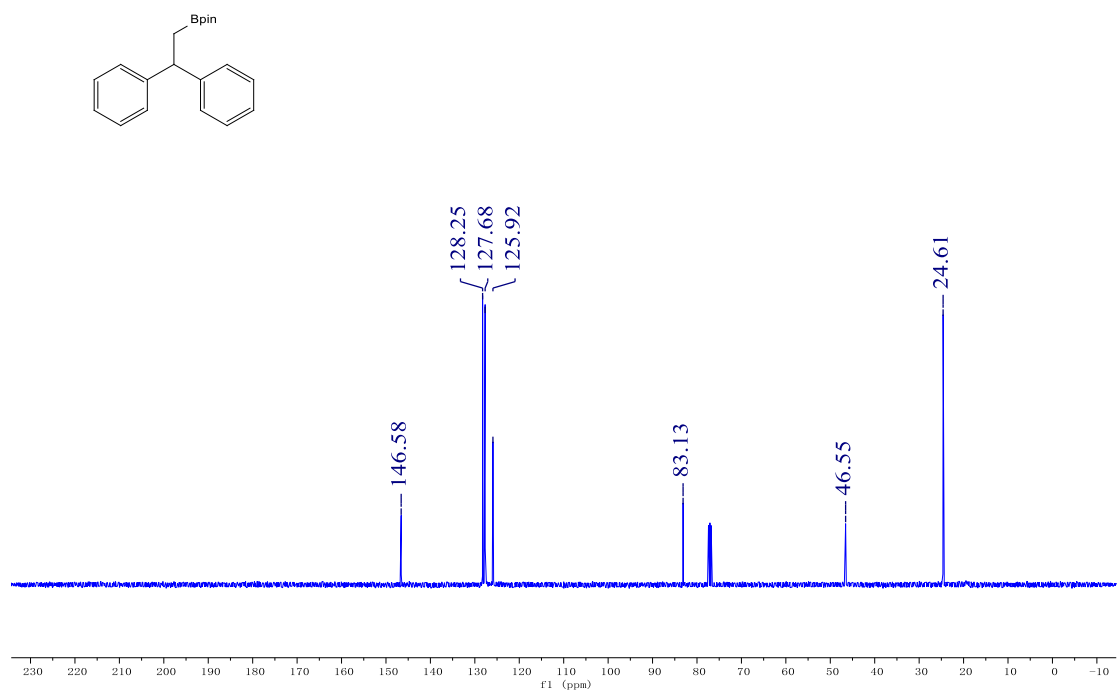

5n

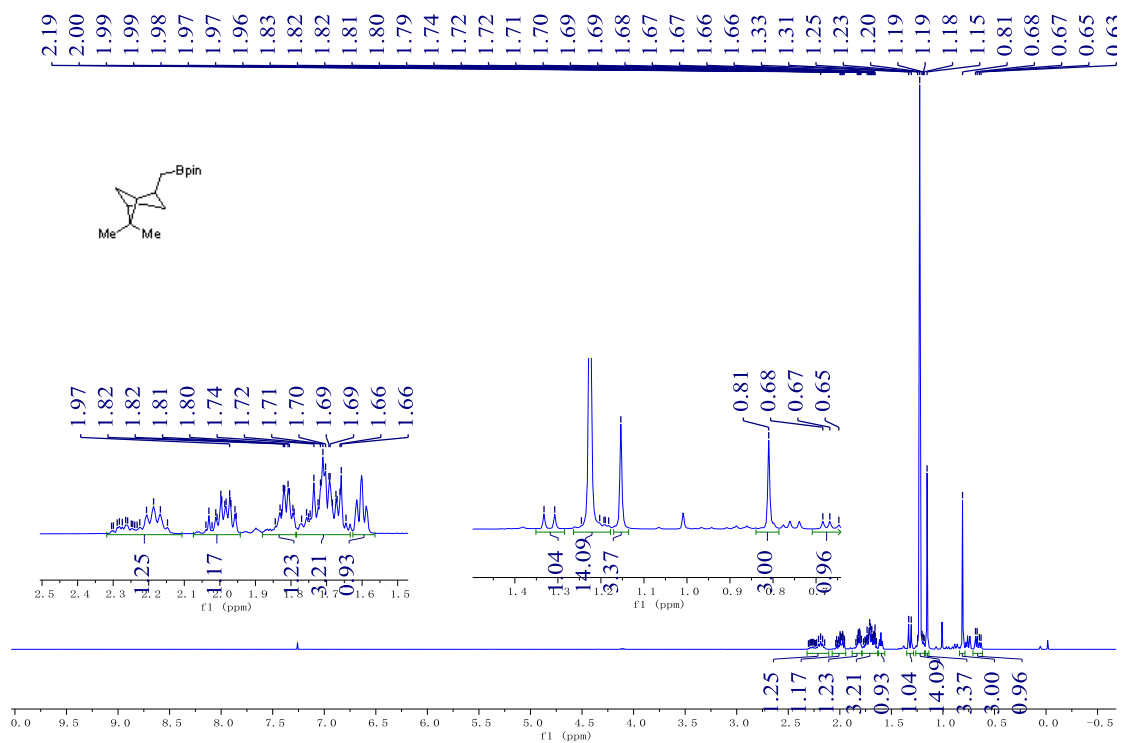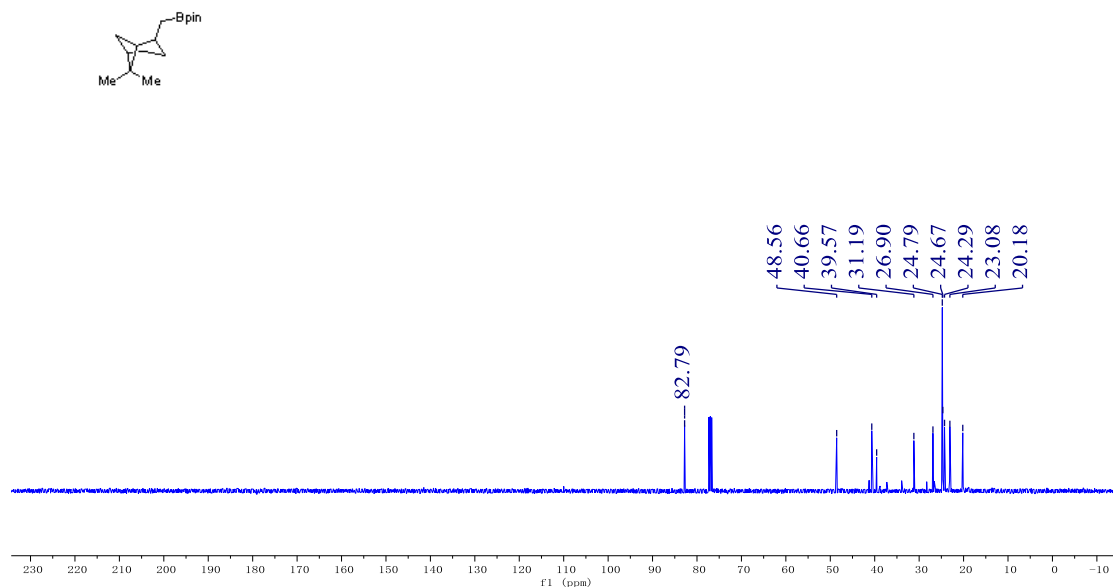

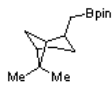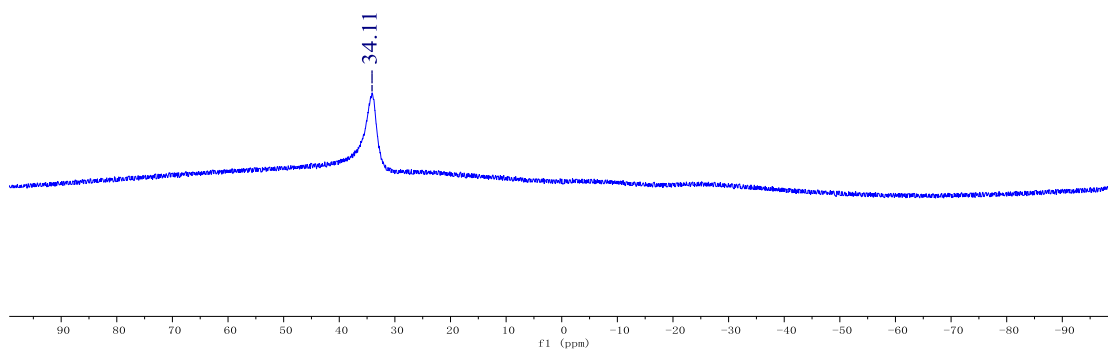

50

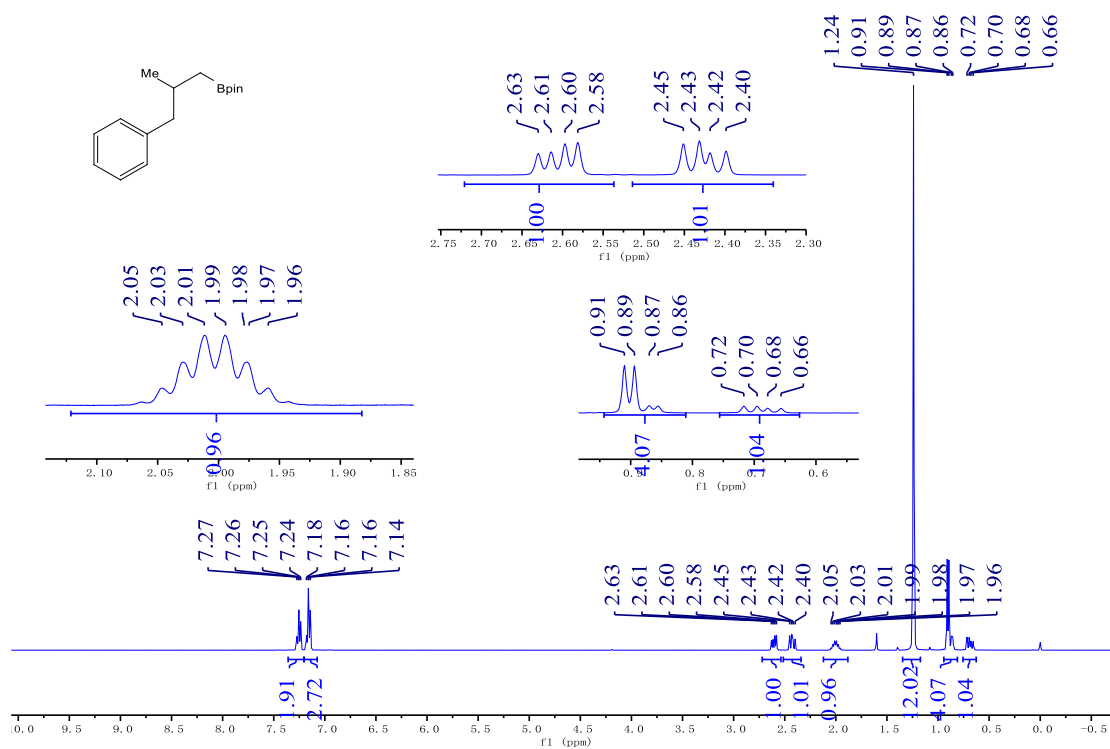

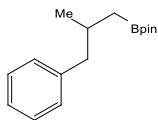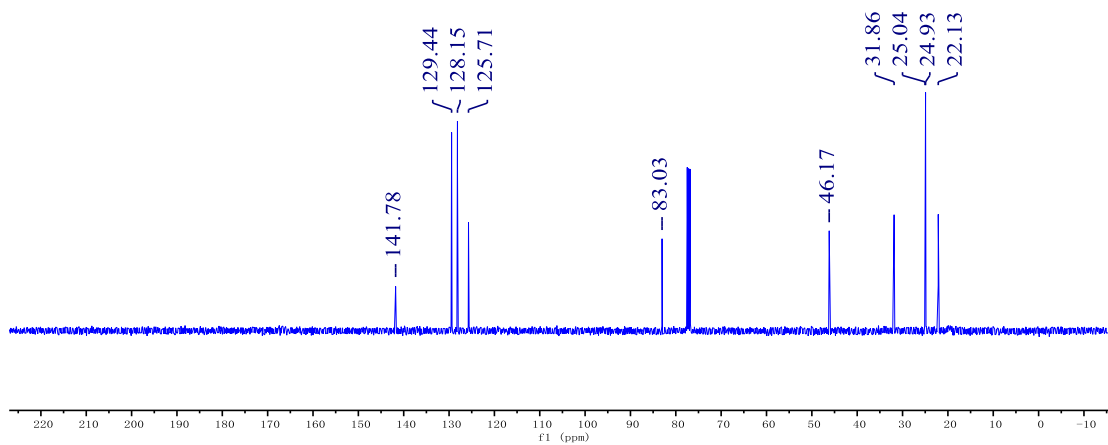

5p

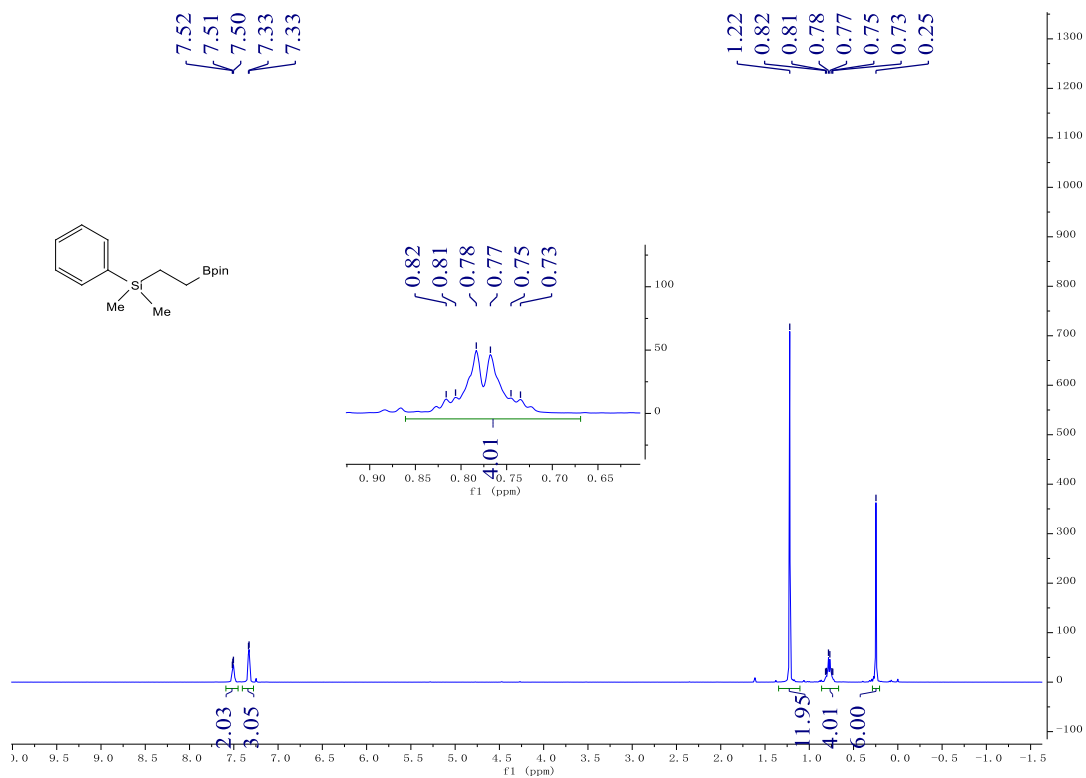

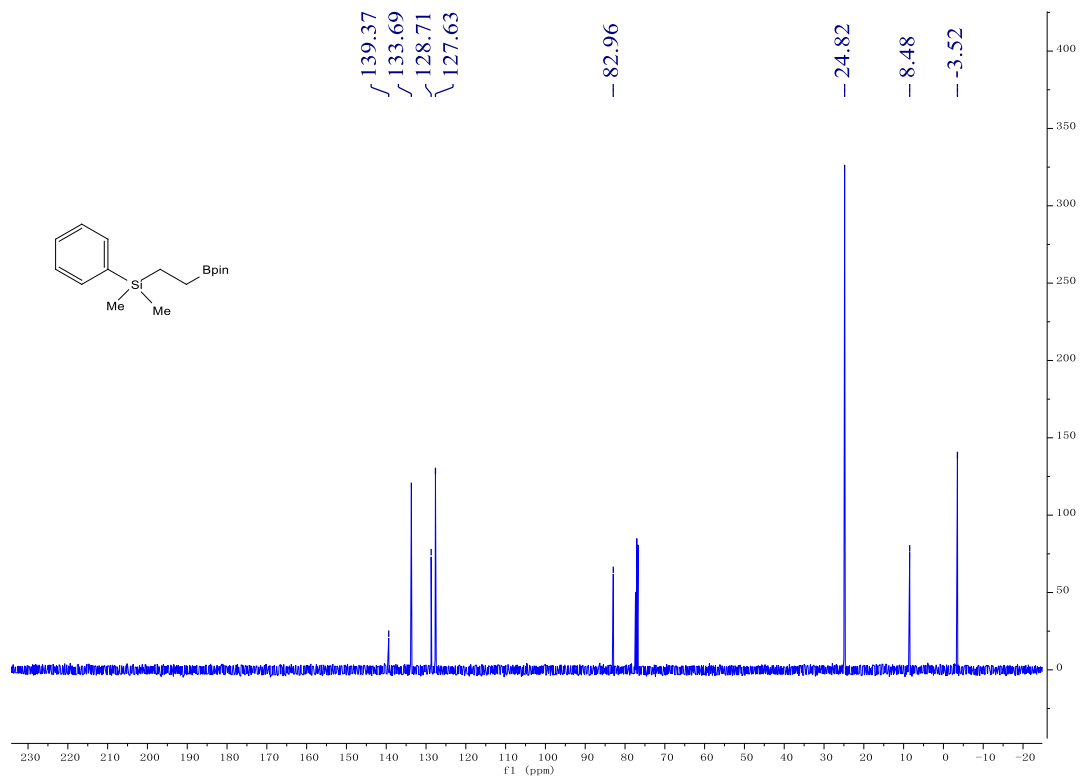

7a

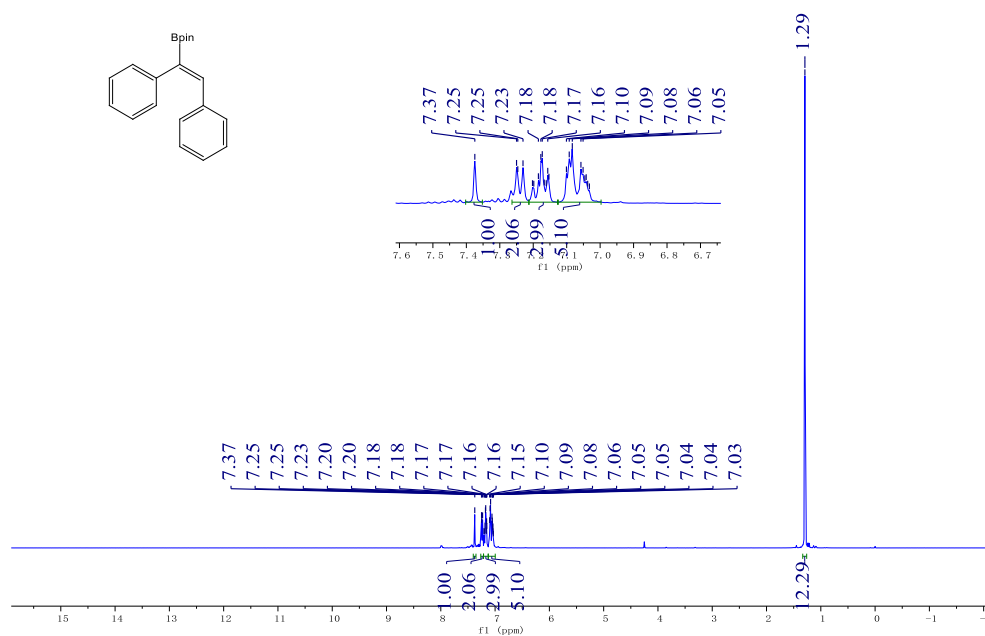



7b

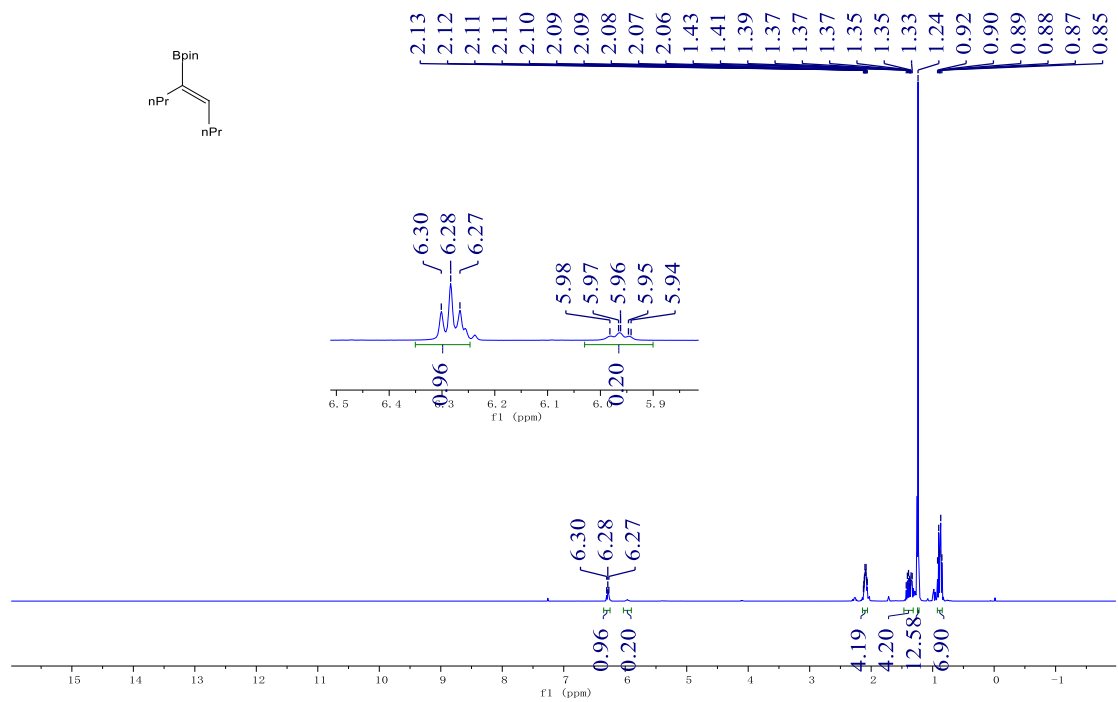

7c

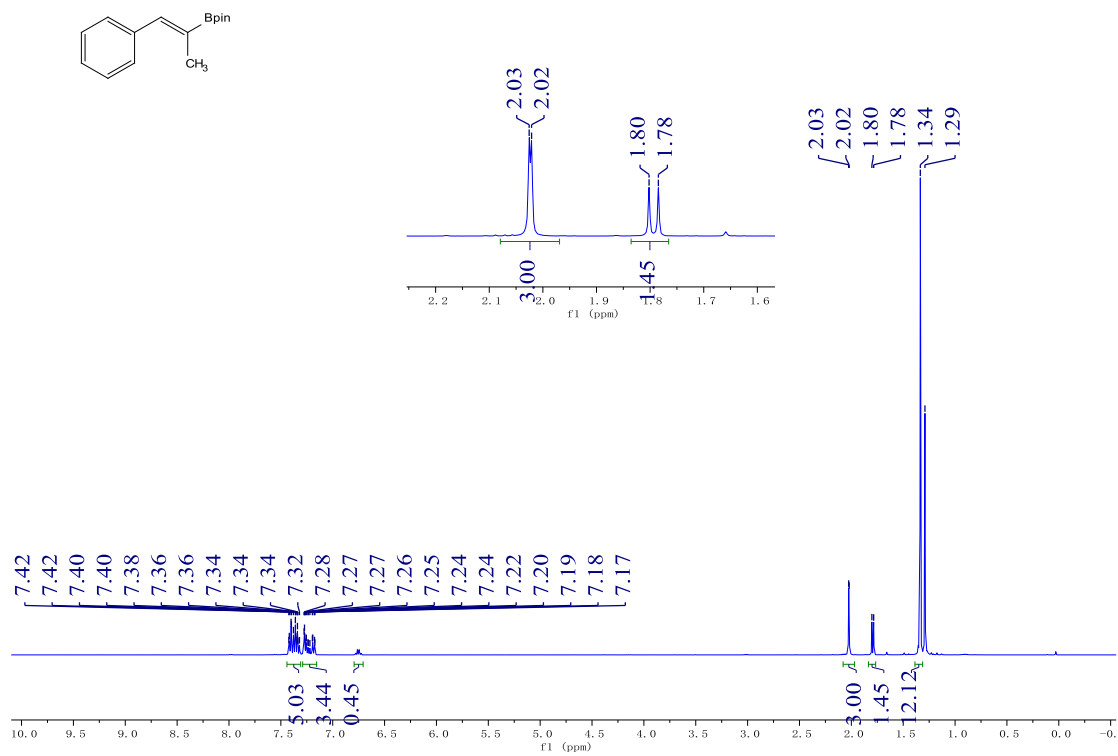

7d

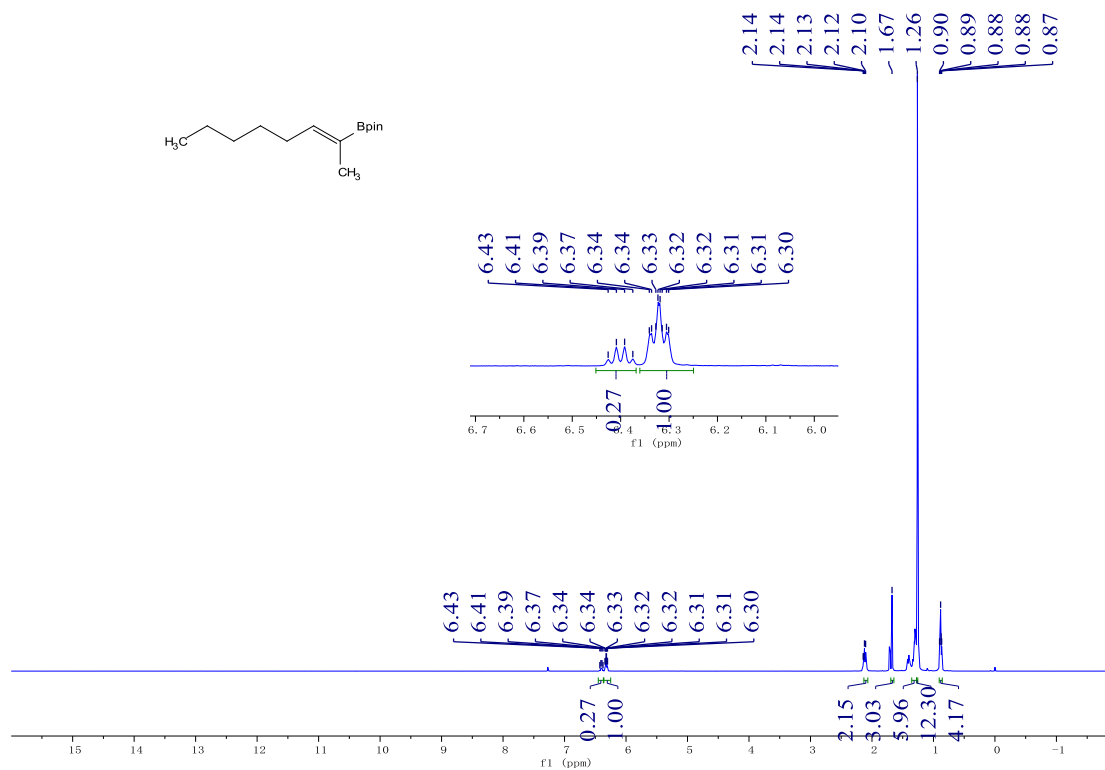

7e

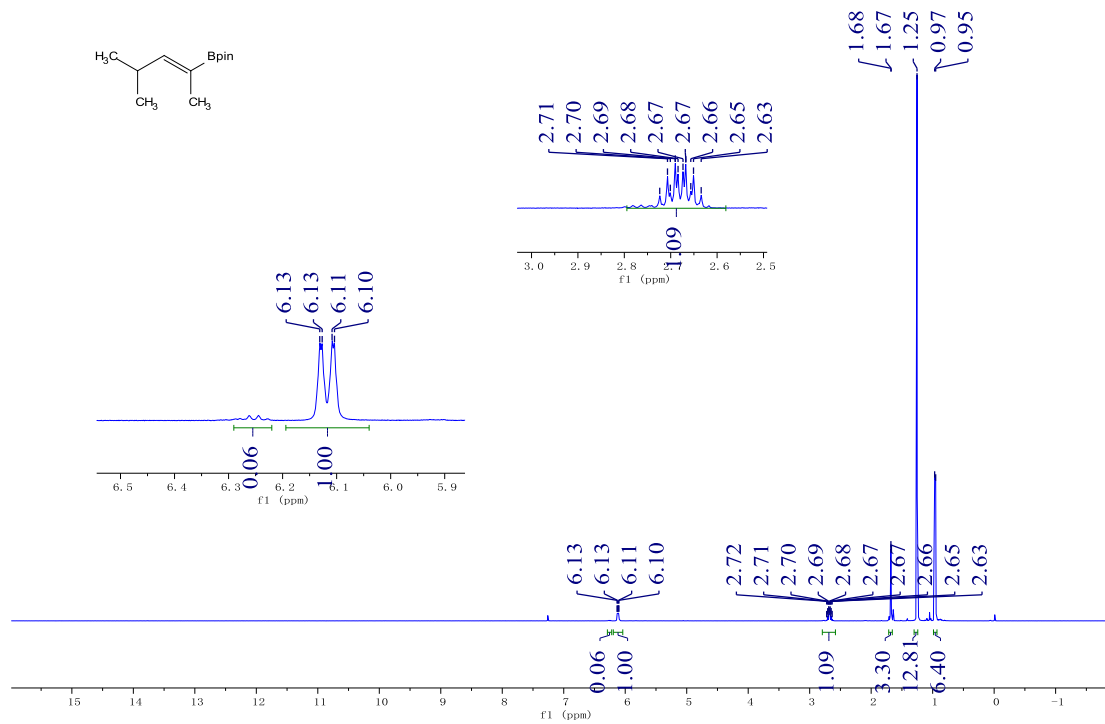

7f

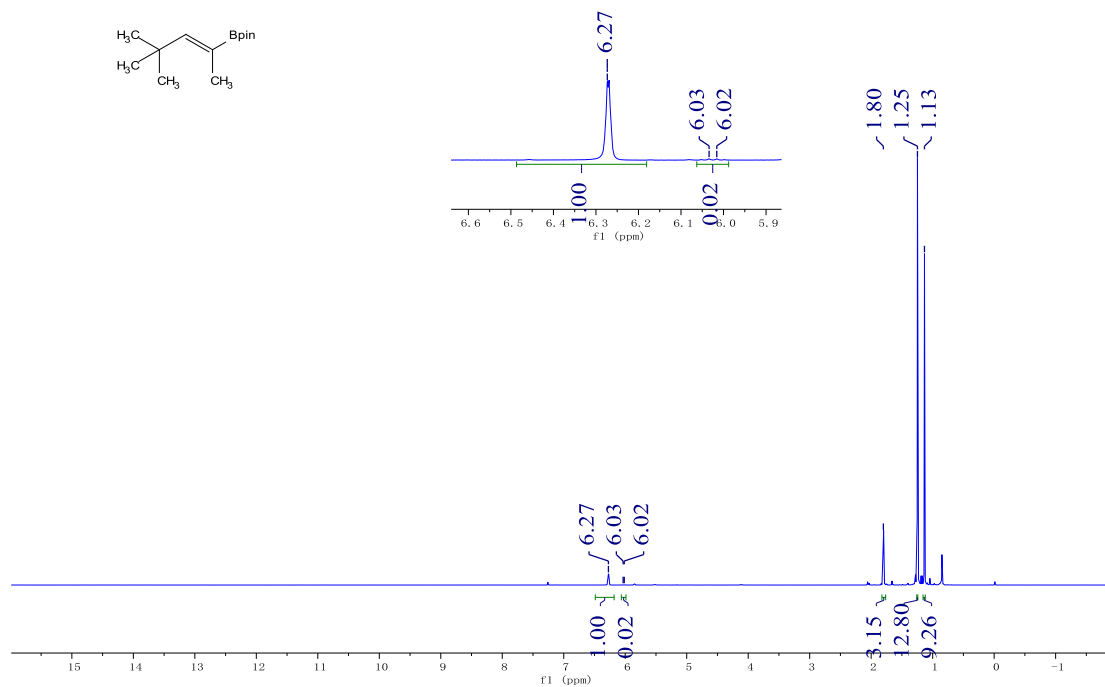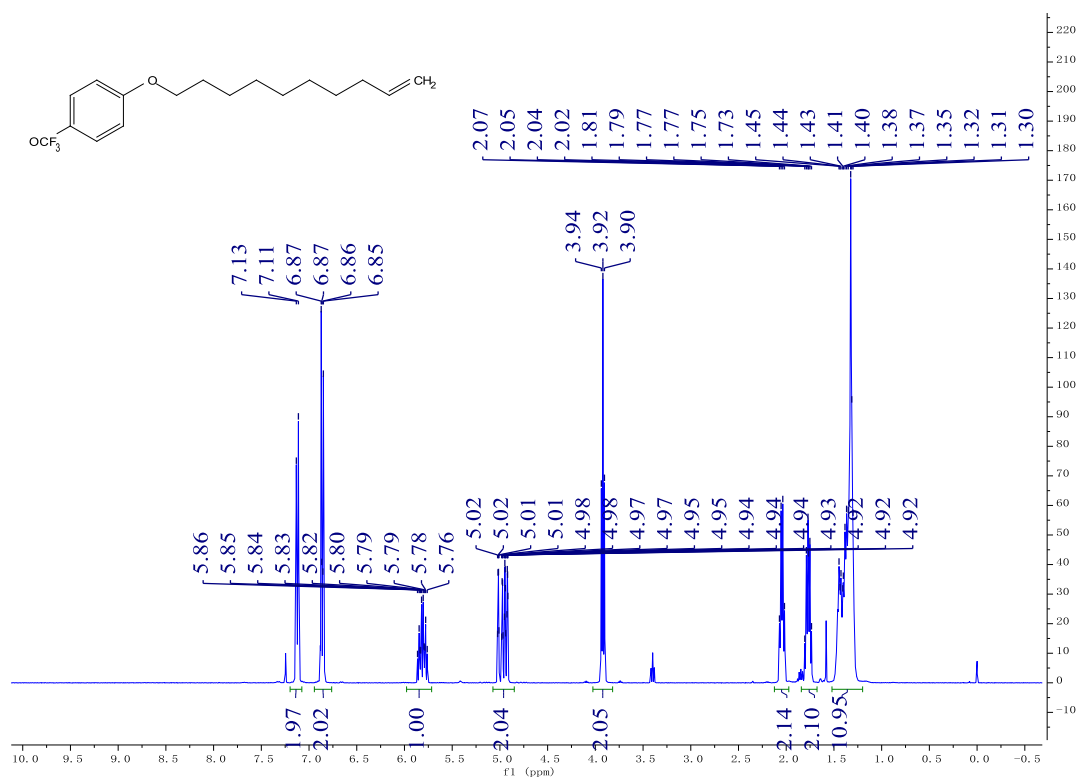

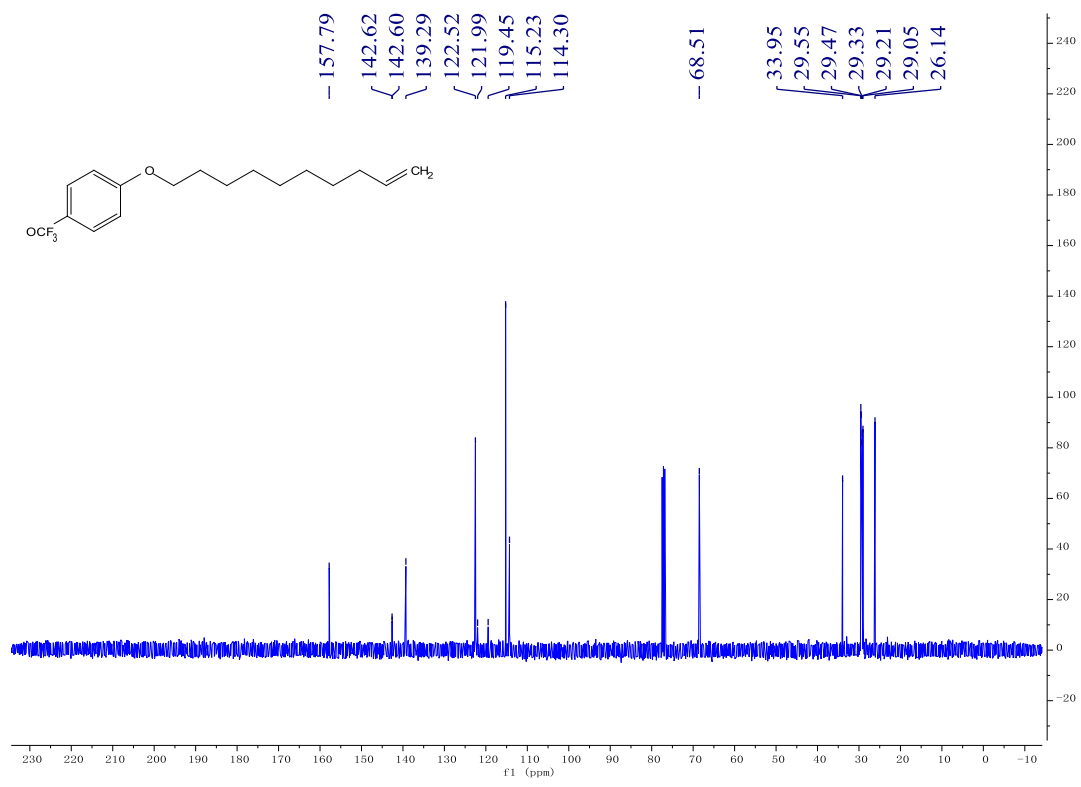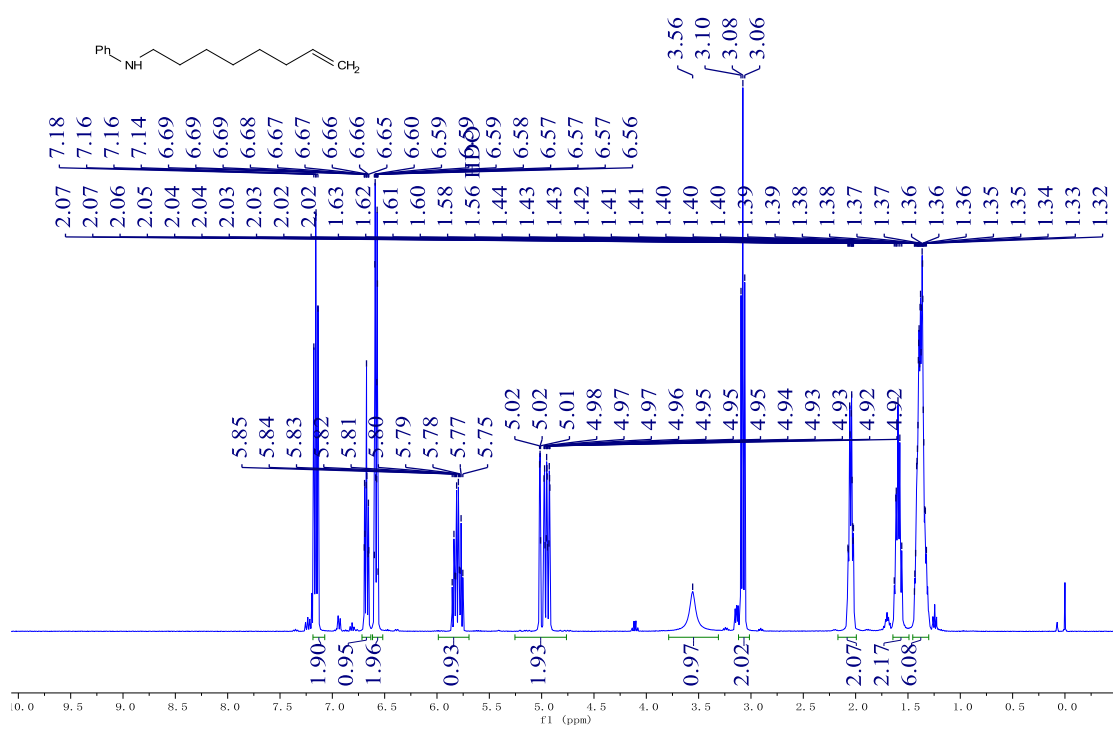

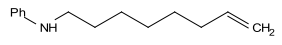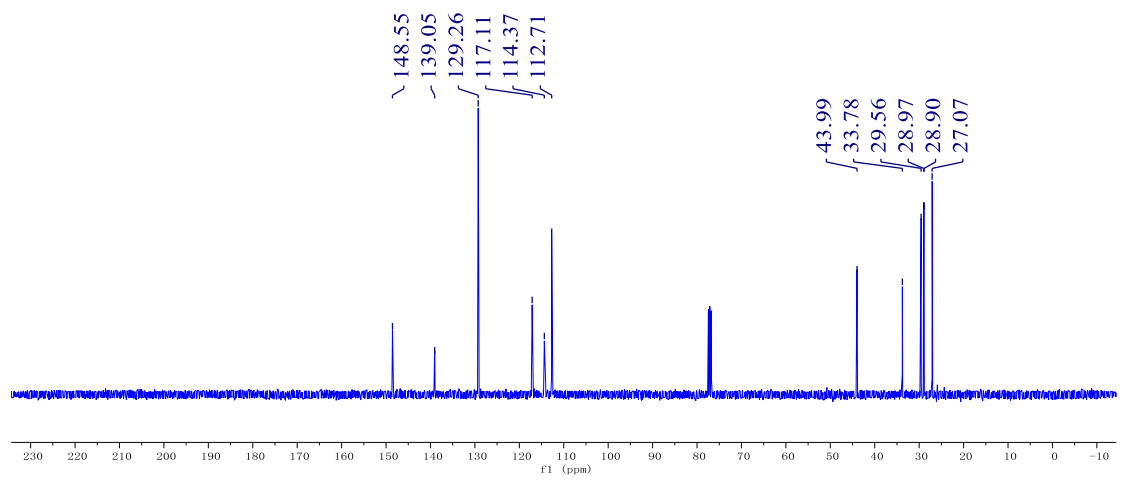

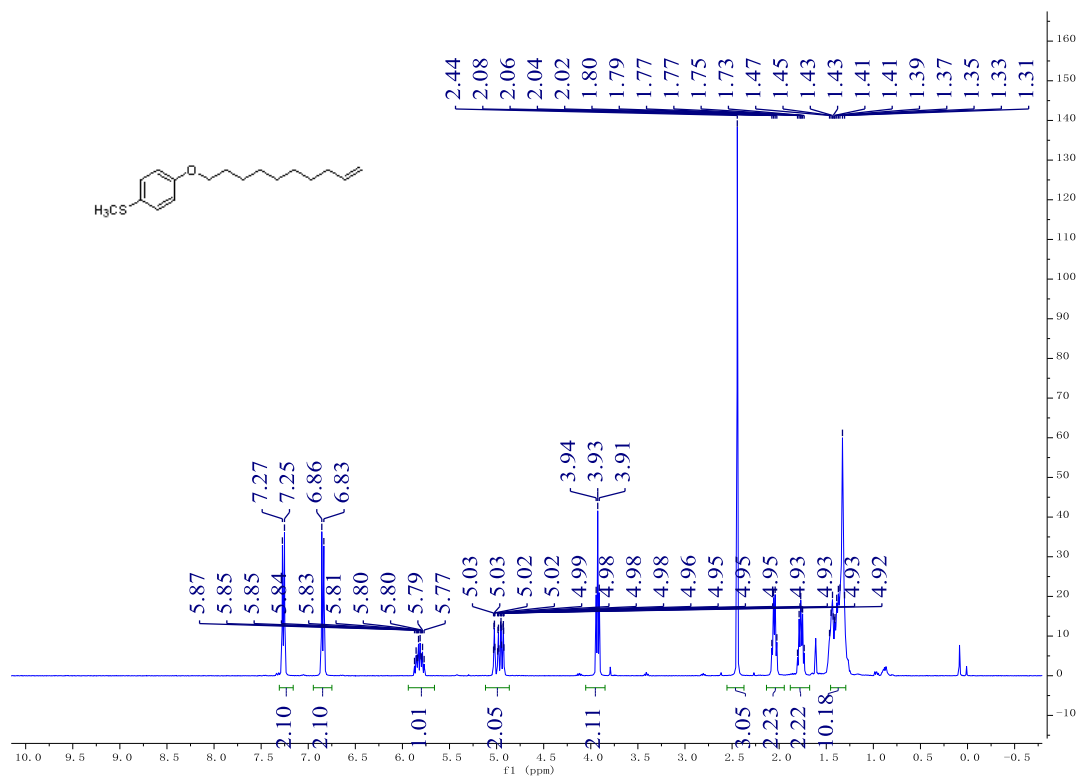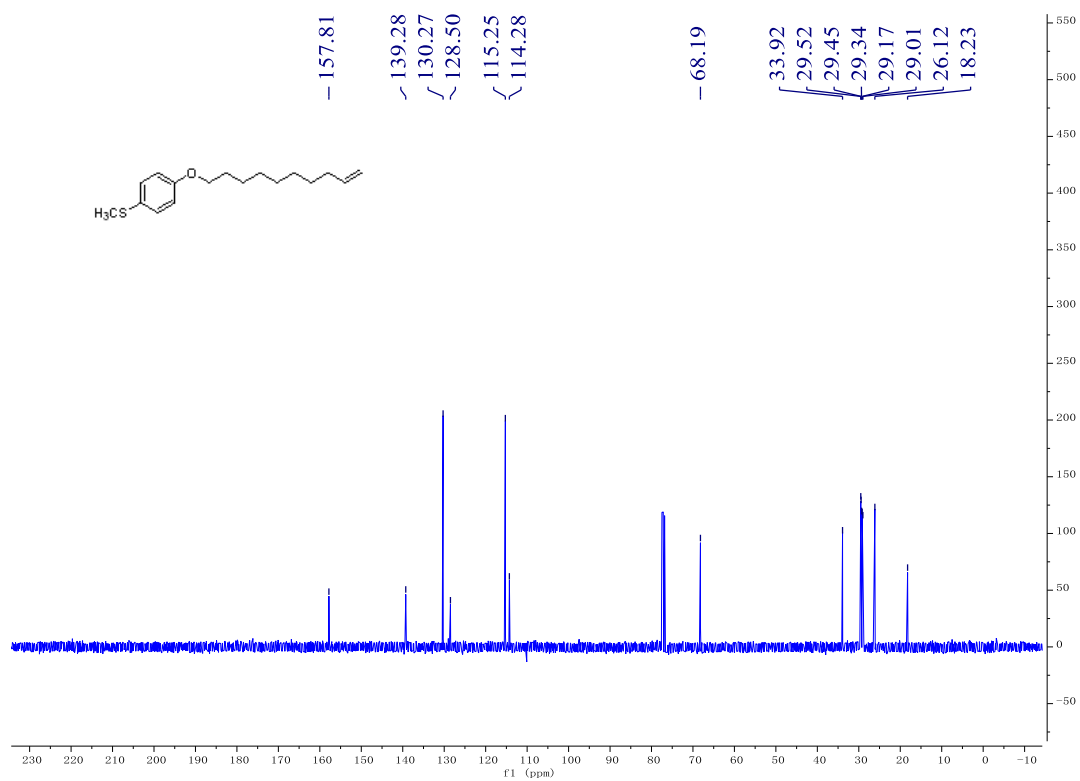

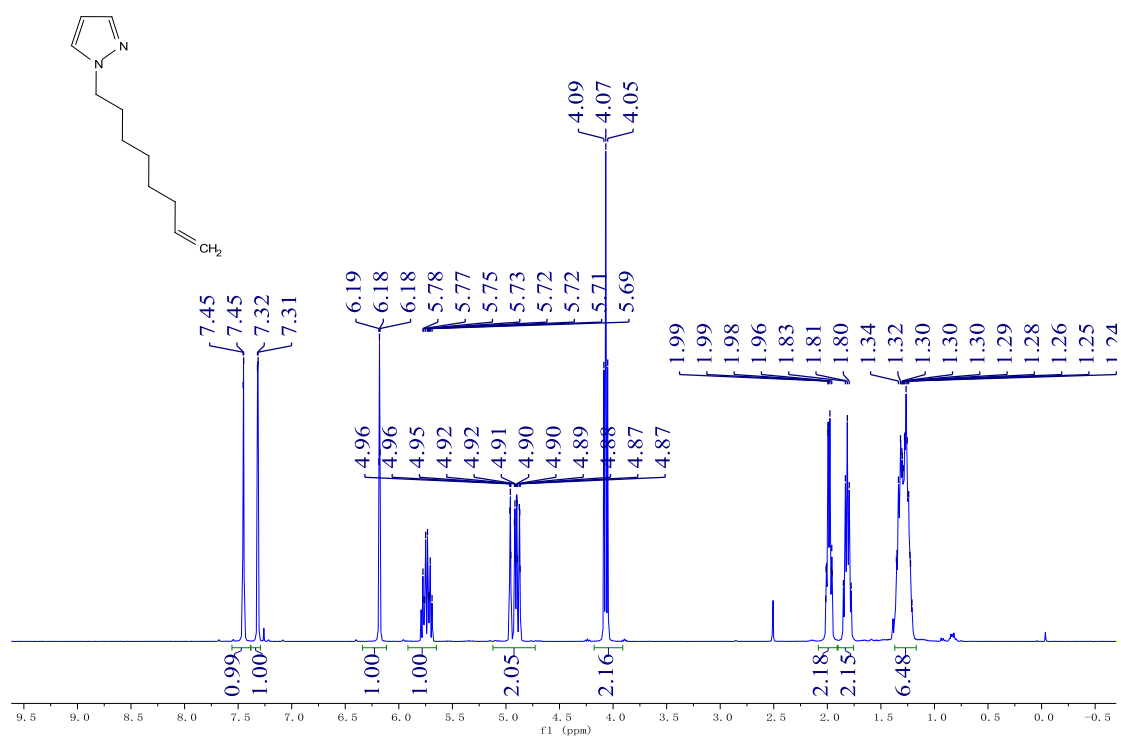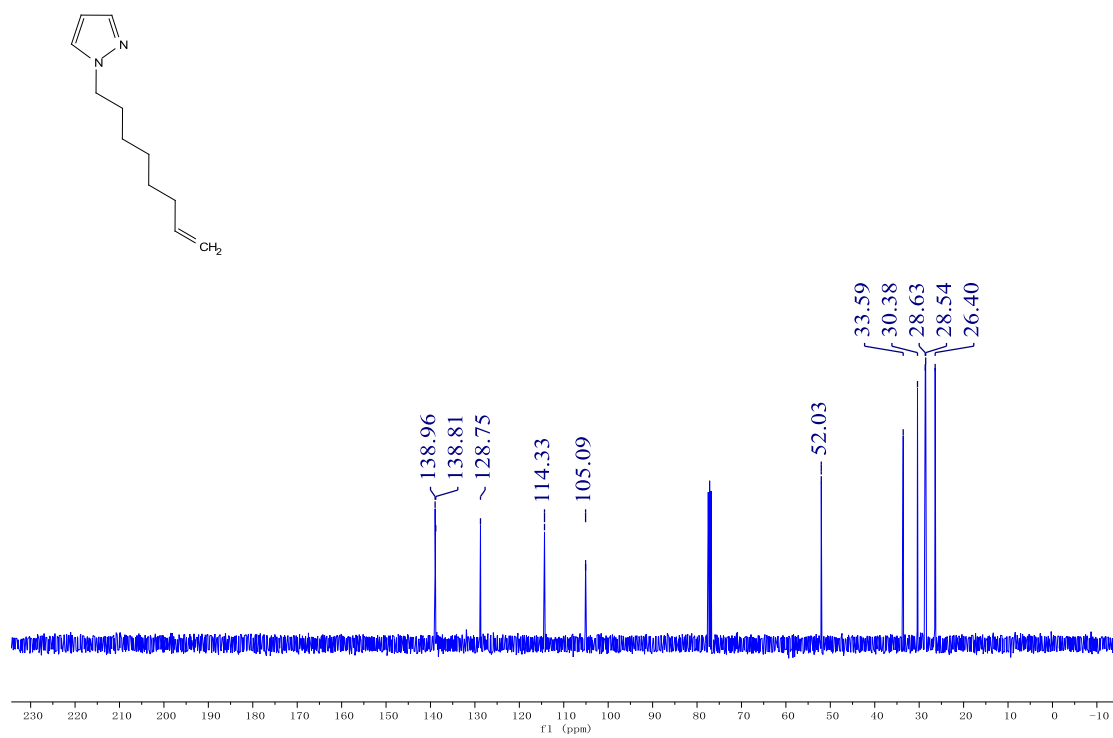

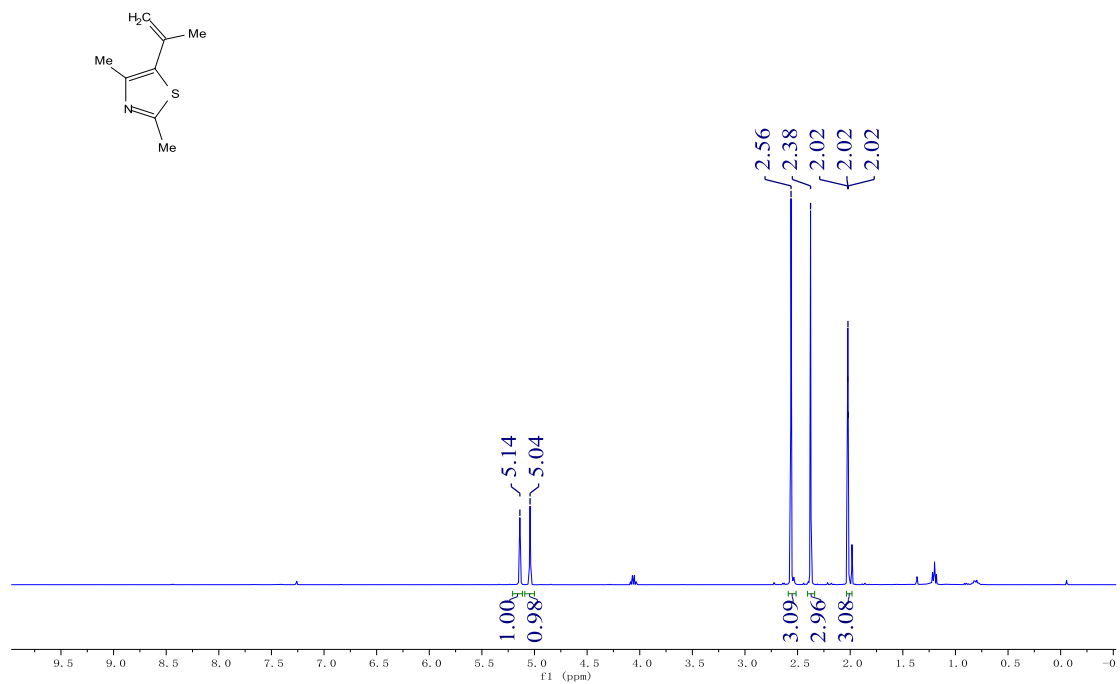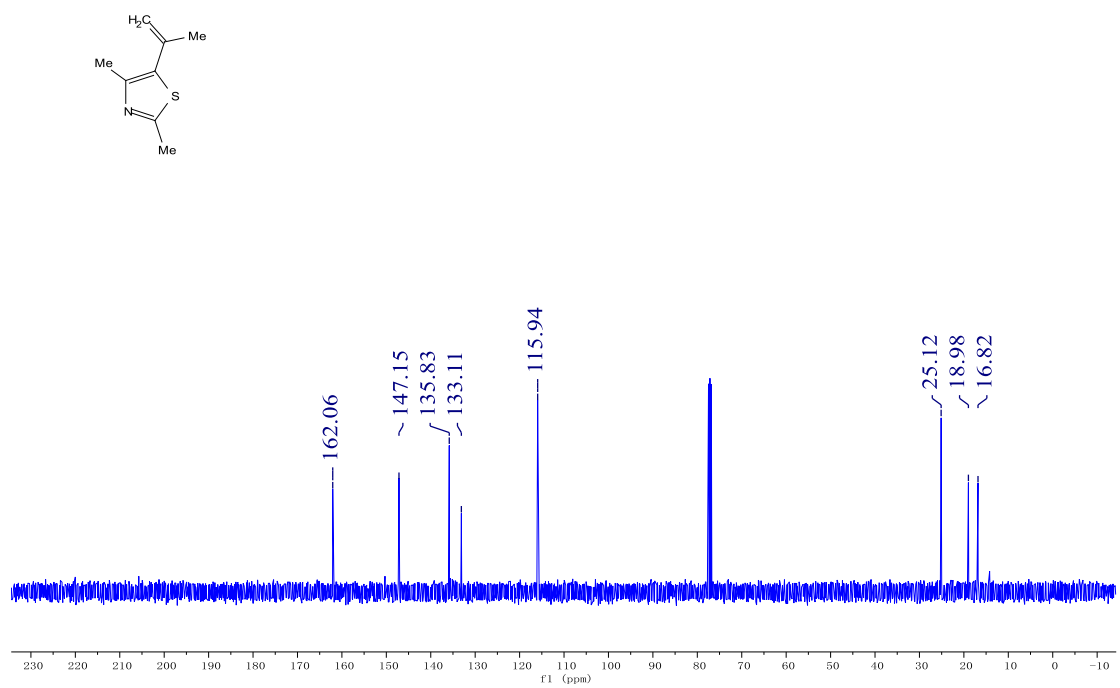



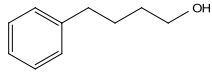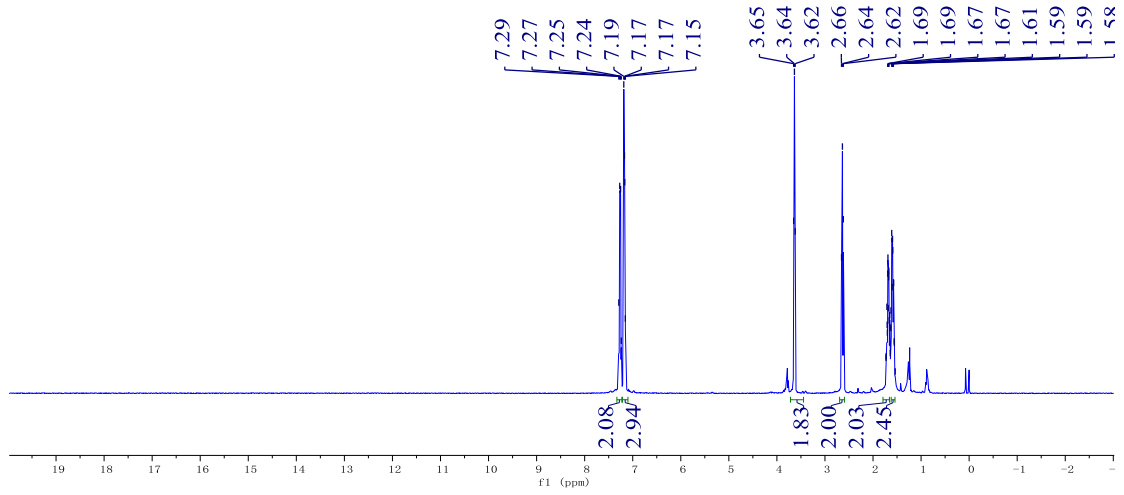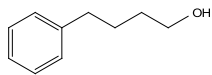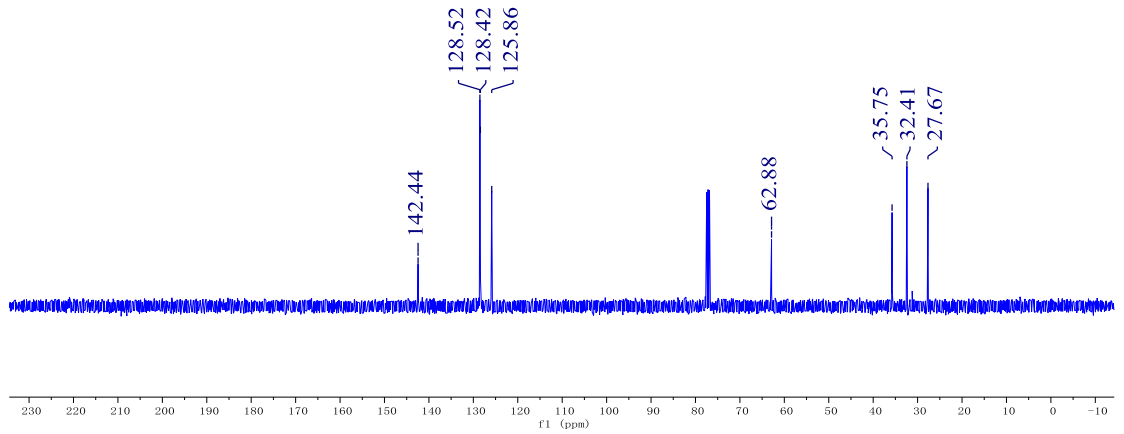

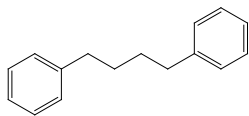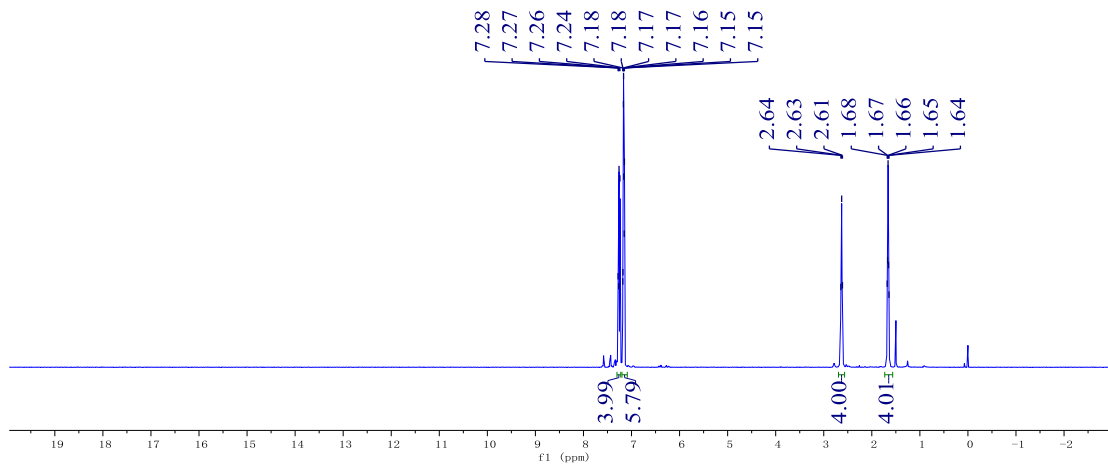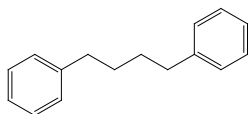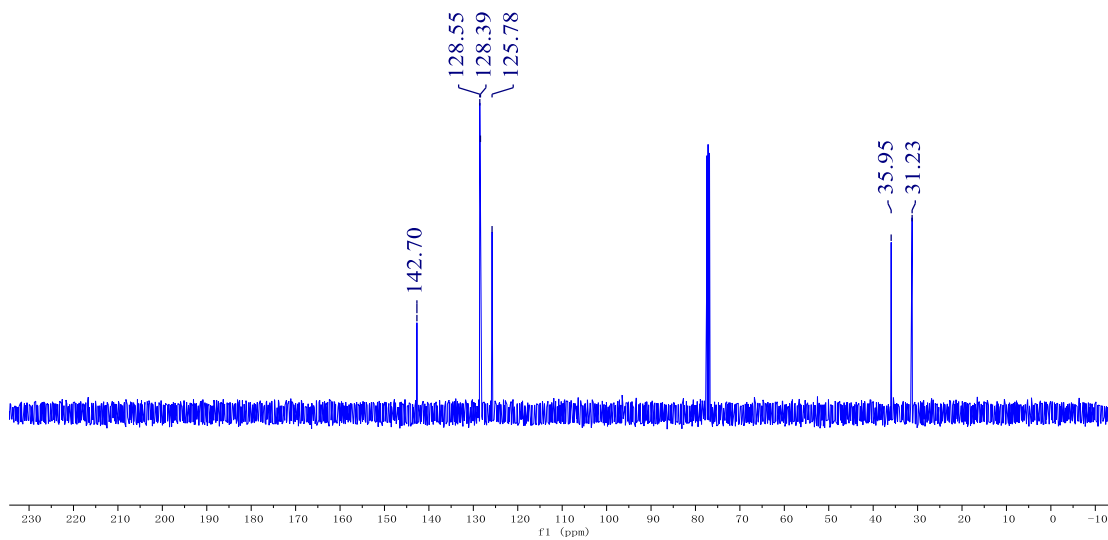

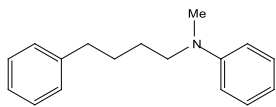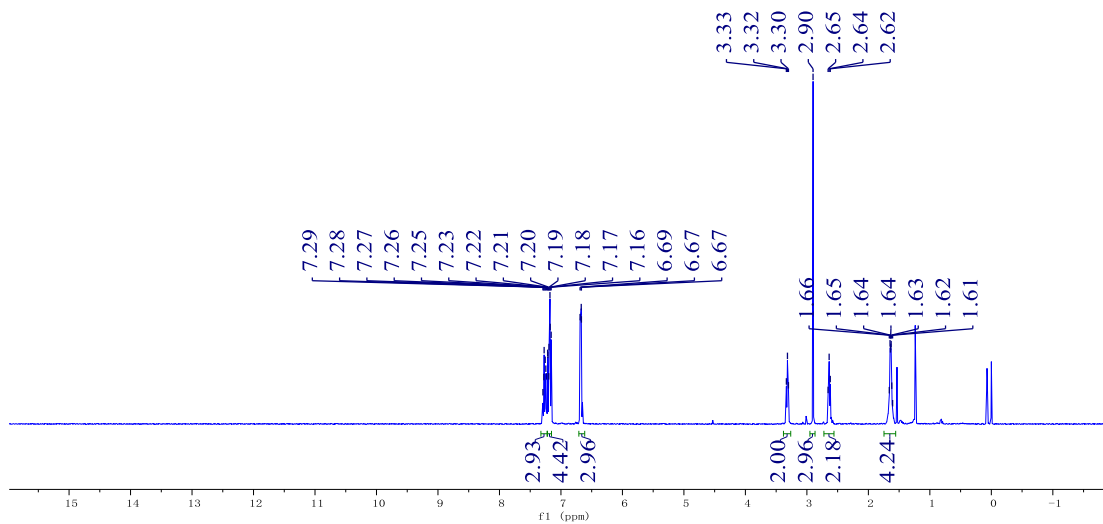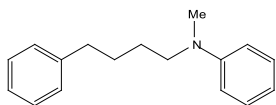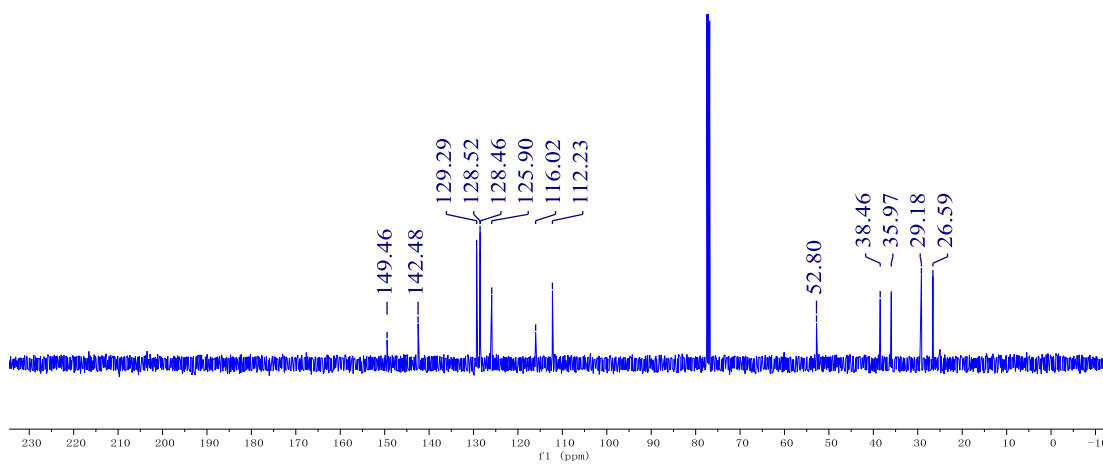

Supplement: c9qo00750d1.pdf [file c9qo00750d1.pdf]
